# Supplementary material for: Synthesis of isoxazoloazaborines via gold(i)-catalyzed propargyl aza-Claisen rearrangement/borylative cyclization cascade
Source: Royal Society of Chemistry journal article supplement (doi:10.1039/d1cc07002a), 2022-01-01

**Supporting Information (67 pages)**

**Synthesis of Isoxazoloazaborines via Gold(I)-Catalyzed Propargyl Aza-Claisen Rearrangement/Borylative Cyclization Cascade**

Masato Tsuda,<sup>1</sup> Taiki Morita,<sup>1,2</sup> Hiroyuki Nakamura\*<sup>1,2</sup>

- 1) *School of Life Science and Engineering, Tokyo Institute of Technology, 4259 Nagatsuta-cho Midori-ku, Yokohama, 226-8503, Japan*
- 2) *Laboratory for Chemistry and Life Science, Institute of Innovative Research, Tokyo Institute of Technology, 4259 Nagatsuta-cho Midori-ku, Yokohama, 226-8503, Japan*

*Corresponding E-mail: hiro@res.titech.ac.jp*

**Table of Contents**

|                                                                                                                                       |     |
|---------------------------------------------------------------------------------------------------------------------------------------|-----|
| 1. General techniques                                                                                                                 | S2  |
| 2. Synthesis of 3-substituted-4-aminoisoxazoles                                                                                       | S2  |
| 3. <i>N</i> -Propargylation of 4-aminoisoxazoles                                                                                      | S3  |
| 4. Synthesis of isoxazoloazaborines <b>3</b>                                                                                          | S4  |
| 5. Synthesis of isoxazoloazaborines <b>5</b> via gold(I)-catalyzed propargyl aza-Claisen rearrangement/borylative cyclization cascade | S5  |
| 6. Synthesis of oxazine-fused azaborine <b>6</b> via methylene insertion into N-O bond of isoxazoloazaborine <b>5a</b>                | S14 |
| 7. References                                                                                                                         | S15 |
| 8. NMR spectra                                                                                                                        | S16 |

## 1. General techniques

NMR spectra were recorded on a Bruker biospin AVANCE II (400 MHz for  $^1\text{H}$ , 100 MHz for  $^{13}\text{C}$ , 128 MHz for  $^{11}\text{B}$ ) or a Bruker biospin AVANCE III (500 MHz for  $^1\text{H}$ , 125 MHz for  $^{13}\text{C}$ , 160 MHz for  $^{11}\text{B}$ ) instrument in the indicated solvent. Chemical shifts are reported in units parts per million (ppm) relative to the signal (0.00 ppm) for internal tetramethylsilane for solutions in  $\text{CDCl}_3$  (7.26 ppm for  $^1\text{H}$ , 77.16 ppm for  $^{13}\text{C}$ ).  $^{11}\text{B}$  NMR chemical shifts are externally referenced to  $\text{BF}_3 \cdot \text{Et}_2\text{O}$  (0.00 ppm). Multiplicities are reported using the following abbreviations: s; singlet, d; doublet, dd; doublet of doublets, t; triplet, dt; doublet of triplets q; quartet, quint; quintet, m; multiplet, br; broad, *J*; coupling constants in Hertz. IR spectra were recorded on a JASCO FT/IR-4200 spectrometer. Only the strongest and/or structurally important peaks are reported as IR data given in  $\text{cm}^{-1}$ . Mass spectra were measured using a JMS-700 Mstation and Bruker micrOTOF II. HRMS (EI, 70 eV) was calibrated as perfluorokerosene and HRMS (ESI-TOF) was calibrated as sodium formate. All reactions were monitored by thin-layer chromatography carried out on 0.2 mm E. Merck silica gel plates (60F-254) with UV light (254 nm), and were visualized using an aqueous alkaline  $\text{KMnO}_4$  solution. Gel permeation chromatography (GPC) for purification was performed on Japan Analytical Industry Model LC-9225 NEXT (recycling preparative HPLC) and a Japan Analytical Industry Model UV-600 NEXT ultraviolet detector with a polystyrene gel column (JAIGEL-1H, 20 mm  $\times$  600 mm), using chloroform as solvent (3.5 mL/min). Column chromatography was performed on Silica Gel 60 N, purchased from Fuji Silysia Chemical Ltd. Preparative thin-layer chromatography (PTLC) was performed using Wakogel B5-F silica coated plates (1.0 mm) prepared in our laboratory. 4-*N*-Propargylaminoisoxazoles such as 3-(4-chlorophenyl)-*N*-(4-(trimethylsilyl)but-3-yn-2-yl)isoxazol-4-amine **1a**, 3-phenyl-*N*-(4-(trimethylsilyl)but-3-yn-2-yl)isoxazol-4-amine **1b**, 3-(*p*-tolyl)-*N*-(4-(trimethylsilyl)but-3-yn-2-yl)isoxazol-4-amine **1c**, 3-(*tert*-butyl)-*N*-(4-(trimethylsilyl)but-3-yn-2-yl)isoxazol-4-amine **1e**, 3-(4-chlorophenyl)-*N*-(1-(trimethylsilyl)hept-1-yn-3-yl)isoxazol-4-amine **1g**, and 3-(4-chlorophenyl)-*N*-(4-(dimethyl(phenyl)silyl)but-3-yn-2-yl)isoxazol-4-amine **1i**<sup>1</sup> and potassium organotrifluoroborates<sup>2</sup> were synthesized according to the literatures.

## 2. Synthesis of 3-substituted-4-aminoisoxazoles

### Synthesis of 3-(4-methoxyphenyl)isoxazol-4-amine

To a mixture of (*Z*)-*N*-hydroxy-4-methoxybenzimidoyl chloride<sup>3</sup> (3.71 g, 20.0 mmol) and ethyl (*E*)-3-(pyrrolidin-1-yl)acrylate<sup>4</sup> (3.38 g, 20.0 mmol) in MeCN (2 mL/mmol of 3-(pyrrolidin-1-yl)acrylate), triethylamine (3.3 mL, 24 mmol) was added dropwise at 0 °C under an argon atmosphere. After being stirred at room temperature for 3 h, the residue was poured into diethyl ether and water. The aqueous layer was extracted with diethyl ether. The combined extract was washed with brine, dried over  $\text{MgSO}_4$  and concentrated *in vacuo*. The residue was dissolved in acetic acid (4 mL/mmol of 3-(pyrrolidin-1-yl)acrylate), 6 M HCl (10 mL/mmol of 3-(pyrrolidin-1-yl)acrylate) was added under an argon atmosphere. After being refluxed for 6 h, the residue was poured into ethyl acetate and water. The aqueous layer was extracted with two portions of ethyl acetate. The combined extract was washed with brine, dried over  $\text{MgSO}_4$  and concentrated *in vacuo*. The residue was dissolved in *tert*-butyl alcohol (3 mL/mmol of 3-(pyrrolidin-1-yl)acrylate), diphenyl phosphoryl azide (4.3 mL, 20 mmol) and triethylamine (2.8 mL, 20 mmol) were added. After being stirred at 85 °C for 12 h, the residue was passed through a pad of silica gel and concentrated *in vacuo*. Then, 4 M HCl in dioxane (10 mL/mmol of 3-(pyrrolidin-1-yl)acrylate) was added to the residue. After being stirred at room

temperature for 3 h, saturated aq. NaHCO<sub>3</sub> was added. The mixture was poured into ethyl acetate, the aqueous layer was extracted with two portions of ethyl acetate. The combined extract was washed with brine, dried over MgSO<sub>4</sub> and concentrated *in vacuo* to afford 3-(4-methoxyphenyl)isoxazol-4-amine (983 mg, 5.12 mmol, 26 % in 4 steps) as a white solid. Mp 73-74 °C. <sup>1</sup>H NMR (500 MHz, CDCl<sub>3</sub>) δ 8.03 (s, 1H), 7.73 (d, *J* = 7.9 Hz, 2H), 7.46-7.41 (m, 3H), 3.13 (brs, 2H); <sup>13</sup>C NMR (125 MHz, CDCl<sub>3</sub>) δ 155.7, 144.1, 129.6, 129.0, 128.4, 127.6, 125.6; FT-IR (neat): 3400, 3333, 3222, 3124, 3124, 3065, 1633, 1454, 1396, 895, 698 cm<sup>-1</sup>; HRMS (ESI-TOF): calcd. for [C<sub>10</sub>H<sub>10</sub>N<sub>2</sub>O<sub>2</sub>+Na]<sup>+</sup>, 213.0634; found 213.0634.

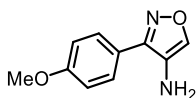

### 3. *N*-Propargylation of 4-aminoisoxazoles

#### Representative procedure for the synthesis of 3-(4-methoxyphenyl)-*N*-(1-phenyl-3-(trimethylsilyl)prop-2-yn-1-yl)isoxazol-4-amine (**1d**)

A mixture of 4-(trimethylsilyl)but-3-yn-2-one (743 μL, 4.5 mmol, 1.5 equiv.), 3-(4-methoxyphenyl)isoxazol-4-amine (570 mg, 3.0 mmol, 1.0 equiv.) and acetic acid (360 μL, 6.0 mmol, 2.0 equiv.) in MeOH (4 mL/1 mmol of 4-aminoisoxazoles) was stirred at 0 °C for 10 min. To the solution was added NaBH<sub>3</sub>CN (566 mg, 9.0 mmol, 3.0 equiv.) at 0 °C. After addition, the mixture was stirred at room temperature for 2 h. The reaction was quenched by addition of water. The resultant mixture was extracted with CH<sub>2</sub>Cl<sub>2</sub> and the combined organic layers were dried over MgSO<sub>4</sub> and filtered. The solvent was removed *in vacuo*, and the residue was purified silica gel column chromatography with hexane : ethyl acetate (19 : 1) to give the desired compound **1d** (380 mg, 0.962 mmol, 32%) as an orange oil. <sup>1</sup>H NMR (400 MHz, CDCl<sub>3</sub>) δ 8.16 (s, 1H), 7.73 (d, *J* = 8.8 Hz, 2H), 7.01 (d, *J* = 8.8, 2H), 3.89-3.84 (m, 4H), 3.00 (brs, 1H), 1.49 (d, *J* = 6.8 Hz, 3H), 0.14 (s, 9H); <sup>13</sup>C NMR (100 MHz, CDCl<sub>3</sub>) δ 160.8, 155.2, 143.5, 129.3, 127.6, 121.2, 114.6, 106.5, 88.1, 55.5, 45.2, 22.4, 0.04; FT-IR (neat): 2972, 2842, 1635, 1611, 1463, 1251, 1051, 1032, 894, 837 cm<sup>-1</sup>; HRMS (ESI-TOF): calcd. for [C<sub>17</sub>H<sub>22</sub>N<sub>2</sub>O<sub>2</sub>Si +Na]<sup>+</sup>, 337.1343; found 337.1343.

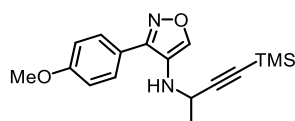

#### 3-Pentyl-*N*-(4-(trimethylsilyl)but-3-yn-2-yl)isoxazol-4-amine (**1f**)

Following the representative procedure using 4-(trimethylsilyl)but-3-yn-2-one (619 μL, 3.8 mmol) and 3-pentylisoxazol-4-amine (392 mg, 2.5 mmol),<sup>1</sup> purification by silica gel column chromatography with hexane : ethyl acetate (19 : 1) afforded the desired compound **1f** (380 mg, 0.962 mmol, 32%) as a yellow solid. Mp 120-122 °C. <sup>1</sup>H NMR (400 MHz, CDCl<sub>3</sub>) δ 8.02 (s, 1H), 3.84 (brs, 1H), 2.69 (brs, 1H), 2.57 (t, *J* = 7.6 Hz, 2H), 1.73-1.69 (m, 2H), 1.48 (d, *J* = 6.8 Hz, 3H), 1.38-1.35 (m, 4H), 0.90 (t, *J* = 6.8 Hz, 3H), 0.13 (s, 9H); <sup>13</sup>C NMR (100 MHz, CDCl<sub>3</sub>) δ 157.2, 142.7, 127.7, 106.7, 88.0, 45.2, 31.7, 26.8, 24.3, 22.3, 14.1, 0.03; FT-IR (neat): 2957, 2867, 1732, 1698, 1558, 1541, 1507, 1457, 1052, 1032, 838, 762 cm<sup>-1</sup>; HRMS (ESI-TOF): calcd. for [C<sub>15</sub>H<sub>26</sub>N<sub>2</sub>O<sub>2</sub>Si +Na]<sup>+</sup>, 310.1707; found 310.1703.

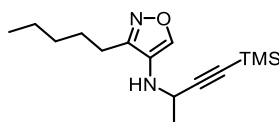

### 3-(4-Chlorophenyl)-N-(1-phenyl-4-(trimethylsilyl)but-3-yn-2-yl)isoxazol-4-amine (**1h**)

Following the representative procedure using 3-(4-chlorophenyl)isoxazol-4-amine (584 mg, 3.0 mmol)<sup>5</sup> and 1-phenyl-4-(trimethylsilyl)but-3-yn-2-one (631 mg, 4.5 mmol),<sup>6</sup> purification by silica gel column chromatography with hexane : ethyl acetate (19 : 1) afforded the desired compound **1h** (380 mg, 0.962 mmol, 32%) as a brown oil. <sup>1</sup>H NMR (500 MHz, CDCl<sub>3</sub>) δ 8.22 (s, 1H), 7.58 (d, *J* = 8.5 Hz, 2H), 7.38 (d, *J* = 8.5, 2H), 7.34-7.25 (m, 5H), 3.97 (t, *J* = 6.0 Hz, 1H), 3.08 (dd, *J* = 16.5, 6.5 Hz, 2H), 2.97 (brs, 1H), 0.15 (s, 9H); <sup>13</sup>C NMR (125 MHz, CDCl<sub>3</sub>) δ 154.6, 144.4, 136.5, 135.8, 129.8, 129.3, 129.0, 128.7, 127.3, 127.2, 104.8, 90.3, 50.9, 41.6, -0.05; FT-IR (neat): 3338, 2958, 2898, 2167, 1618, 1494, 1413, 1249, 1093, 878, 843 cm<sup>-1</sup>; HRMS (ESI-TOF): *m/z* [C<sub>22</sub>H<sub>23</sub>ClN<sub>2</sub>OSi + Na]<sup>+</sup> calcd. for, 417.1160: found 417.1160.

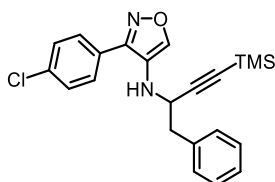

## 4. Synthesis of isoxazoloazaborines **3**

### 3-(4-Chlorophenyl)-6-(1-hydroxyethyl)-7-(trimethylsilyl)isoxazolo[5,4-*e*][1,2]azaborinin-5(4*H*)-ol (**3a**)

To a mixture of RuPhosAuCl (7.0 mg, 0.010 mmol) and AgOTf (2.6 mg, 0.010 mmol) in a sealed vial, 4-propargylaminoisoxazole **1a** (31.9 mg, 0.10 mmol) in acetonitrile (1 mL) was added at room temperature under an argon atmosphere. After stirred at room temperature for 2 h, the mixture was passed through a pad of celite and concentrated *in vacuo*. The allene residue **2a** was dissolved in dichloromethane (3 mL). After the mixture was cooled at -40 °C, boron trichloride solution (1.0 M in heptane, 400 μL, 0.40 mmol) was added. The reaction mixture was stirred at 80 °C for 16 h. The reaction was quenched with H<sub>2</sub>O. The resultant mixture was extracted with ethyl acetate and the combined organic layers were dried over MgSO<sub>4</sub> and filtered. The solvent was removed *in vacuo*, and the residue was purified by PTLC with hexane : ethyl acetate (19 : 1) to give 3-(4-chlorophenyl)-6-(1-hydroxyethyl)-7-(trimethylsilyl)isoxazolo[5,4-*e*][1,2]azaborinin-5(4*H*)-ol **3a** (18.2 mg, 0.050 mmol, 50%) as a yellow solid. Mp 169-170 °C. <sup>1</sup>H NMR (500 MHz, CDCl<sub>3</sub>) δ 7.66 (d, *J* = 8.5 Hz, 2H), 7.51 (d, *J* = 8.5 Hz, 2H), 6.75 (brs, 1H), 6.56 (brs, 1H), 5.36 (q, *J* = 6.5 Hz, 1H), 1.48 (d, *J* = 6.5 Hz, 3H), 0.48 (s, 9H); <sup>13</sup>C NMR (125 MHz, CDCl<sub>3</sub>) δ 158.9, 151.3, 139.6, 136.2, 129.8, 128.7, 127.2, 120.7, 72.6, 29.4, 25.4, 1.8; <sup>11</sup>B NMR (160 MHz, CDCl<sub>3</sub>) δ 28.39; FT-IR (neat): 3345, 3270, 1410, 1275, 1046, 840 cm<sup>-1</sup>; HRMS (EI, 70 eV): calcd. for [C<sub>16</sub>H<sub>20</sub>ClN<sub>2</sub>O<sub>3</sub>SiB]<sup>+</sup>, 362.1025: found 362.1020.

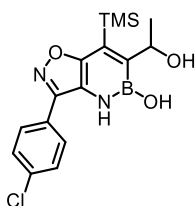

### 3-(4-Chlorophenyl)-7-(trimethylsilyl)-6-vinylisoxazolo[5,4-*e*][1,2]azaborinin-5(4*H*)-ol (3b)

To a mixture of RuPhosAuCl (7.0 mg, 0.010 mmol) and AgOTf (2.6 mg, 0.010 mmol) in a sealed vial, 4-propargylaminoisoxazole **1a** (31.9 mg, 0.100 mmol) in acetonitrile (1 mL) was added at room temperature under an argon atmosphere. After stirred at room temperature for 2 h, the mixture was cooled at -40 °C, then boron trichloride solution (1.0 M in heptane, 400 μL, 0.400 mmol) was added. The reaction mixture was warmed to 100 °C, and stirred for 16 h. The reaction was quenched with H<sub>2</sub>O. The resultant mixture was extracted with ethyl acetate and the combined organic layers were dried over MgSO<sub>4</sub> and filtered. The solvent was removed *in vacuo*, and the residue was purified by PTLC with hexane : ethyl acetate (19 : 1) to give 3-(4-chlorophenyl)-7-(trimethylsilyl)-6-vinylisoxazolo[5,4-*e*][1,2]azaborinin-5(4*H*)-ol **3b** (17.5 mg, 0.051 mmol, 51%) as a yellow solid. Mp 135-136 °C. <sup>1</sup>H NMR (500 MHz, CDCl<sub>3</sub>) δ 7.68 (d, *J* = 9.0 Hz, 2H), 7.52 (d, *J* = 9.0 Hz, 2H), 7.03 (dd, *J* = 18.0, 11.5 Hz, 1H), 6.29 (brs, 1H), 5.51 (dd, *J* = 11.0, 1.5 Hz, 1H), 5.37 (dd, *J* = 18.0, 1.5 Hz, 1H), 4.54 (brs, 1H), 0.47 (s, 9H); <sup>13</sup>C NMR (125 MHz, CDCl<sub>3</sub>) δ 159.5, 151.3, 142.5, 140.2, 136.2, 129.9, 128.7, 127.2, 120.4, 118.0, 1.2; <sup>11</sup>B NMR (160 MHz, CDCl<sub>3</sub>) δ 27.78; FT-IR (neat): 3318, 2923, 1410, 1251, 1015, 834 cm<sup>-1</sup>; HRMS (EI, 70 eV): calcd. for [C<sub>16</sub>H<sub>18</sub>BClN<sub>2</sub>O<sub>2</sub>Si]<sup>+</sup>, 345.0995; found 345.0985.

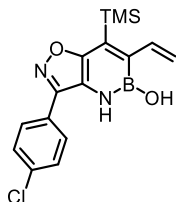

## 5. Synthesis of isoxazoloazaborines **5** via gold-catalyzed propargyl aza-Claisen rearrangement/borylative cyclization cascade

### General procedure of isoxazoloazaborines **5** synthesis

To a mixture of RuPhosAuCl (0.10 equiv.) and AgOTf (0.10 equiv.) in a Biotage microwave vial, 4-propargylaminoisoxazole **1** (1.0 equiv.) in acetonitrile (10 mL/mmol of **1**) was added at room temperature under an argon atmosphere. After stirred at room temperature for 2 h, potassium organotrifluoroborate (2.0 equiv.), silicon tetrachloride (2.0 equiv.) and triethylamine (2.5 equiv.) were added to the mixture in the glovebox. The reaction mixture was stirred at 100 °C for 1 h. After cooling the reaction mixture to room temperature, the mixture was passed through a pad of celite and concentrated *in vacuo*. The residue was purified by PTLC to afford the desired products **5**.

### 3-(4-Chlorophenyl)-5-phenyl-7-(trimethylsilyl)-6-vinyl-4,5-dihydroisoxazolo[5,4-*e*][1,2]azaborinine (**5a**)

Following the general procedure using 3-(4-chlorophenyl)-*N*-(4-(trimethylsilyl)but-3-yn-2-yl)isoxazol-4-amine **1a** (319 mg, 1.0 mmol) and potassium phenyltrifluoroborate (368 mg, 2.0 mmol), purification by PTLC (hexane : acetone = 39 : 1) afforded the desired product **5a** (317 mg, 0.783 mmol, 78%) as a yellow solid. Mp 103-104 °C. <sup>1</sup>H NMR (500 MHz, CDCl<sub>3</sub>) δ 7.80 (brs, 1H), 7.71 (d, *J* = 8.5 Hz, 2H), 7.61-7.59 (m, 2H), 7.54 (d, *J* = 8.5 Hz, 2H), 7.41-7.38 (m, 3H), 7.14 (dd, *J* = 17.5, 11 Hz, 1H), 5.26 (dd, *J* = 11.5, 2.0 Hz, 1H), 5.03 (dd, *J* = 17.5, 1.5 Hz, 1H), 0.54 (s, 9H); <sup>13</sup>C NMR (125 MHz, CDCl<sub>3</sub>) δ 162.5, 151.2, 141.3, 140.5, 136.4, 133.1, 130.0,

128.9, 128.5, 128.0, 127.0, 120.8, 120.2, 1.83;  $^{11}\text{B}$  NMR (128 MHz,  $\text{CDCl}_3$ )  $\delta$  33.90; FT-IR (neat): 3404, 2955, 2924, 1600, 1502, 1408, 1251, 869, 834  $\text{cm}^{-1}$ ; HRMS (EI, 70 eV): calcd. for  $[\text{C}_{22}\text{H}_{22}\text{BClN}_2\text{OSi}]^+$ , 404.1283: found 404.1283

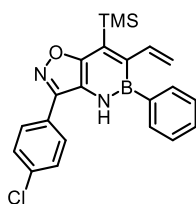

### 3-(4-Chlorophenyl)-5-(*p*-tolyl)-7-(trimethylsilyl)-6-vinyl-4,5-dihydroisoxazolo[5,4-*e*][1,2]azaborinine (5b)

Following the general procedure using 3-(4-chlorophenyl)-*N*-(4-(trimethylsilyl)but-3-yn-2-yl)isoxazol-4-amine **1a** (31.8 mg, 0.10 mmol) and potassium *p*-tolyltrifluoroborate (39.6 mg, 0.20 mmol),<sup>2</sup> purification by PTLC (hexane : acetone = 39 : 1) afforded the desired product **5b** (35.4 mg, 0.0845 mmol, 85%) as a brown oil.  $^1\text{H}$  NMR (500 MHz,  $\text{CDCl}_3$ )  $\delta$  7.76 (brs, 1H), 7.71 (d,  $J$  = 8.0 Hz, 2H), 7.54 (d,  $J$  = 8.5 Hz, 2H), 7.50 (d,  $J$  = 8.0 Hz, 2H), 7.23 (d,  $J$  = 7.5 Hz, 2H), 7.13 (dd,  $J$  = 17.5, 11 Hz, 1H), 5.26 (dd,  $J$  = 11.0, 1.5 Hz, 1H), 5.05 (dd,  $J$  = 17.5, 2.0 Hz, 1H), 2.40 (s, 3H) 0.53 (s, 9H);  $^{13}\text{C}$  NMR (125 MHz,  $\text{CDCl}_3$ )  $\delta$  162.5, 151.2, 141.1, 140.7, 138.4, 136.4, 133.2, 130.0, 128.9, 128.8, 127.0, 120.1, 21.6, 1.86;  $^{11}\text{B}$  NMR (160 MHz,  $\text{CDCl}_3$ )  $\delta$  35.08; FT-IR (neat): 3404, 2954, 2920, 1606, 1500, 1408, 1250, 869, 834  $\text{cm}^{-1}$ ; HRMS (EI, 70 eV): calcd. for  $[\text{C}_{23}\text{H}_{24}\text{BClN}_2\text{OSi}]^+$ , 418.1439: found 418.1451.

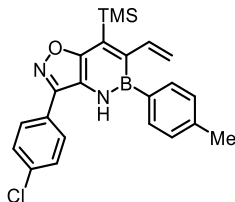

### 3-(4-Chlorophenyl)-5-(4-methoxyphenyl)-7-(trimethylsilyl)-6-vinyl-4,5-dihydroisoxazolo[5,4-*e*][1,2]azaborinine (5c)

Following the general procedure using 3-(4-chlorophenyl)-*N*-(4-(trimethylsilyl)but-3-yn-2-yl)isoxazol-4-amine **1a** (31.9 mg, 0.10 mmol) and potassium trifluoro(4-methoxyphenyl)borate (42.8 mg, 0.20 mmol), purification by PTLC (hexane : acetone = 39 : 1) afforded the desired product **5c** (34.4 mg, 0.0791 mmol, 79%) as a brown oil.  $^1\text{H}$  NMR (500 MHz,  $\text{CDCl}_3$ )  $\delta$  7.73-7.70 (m, 3H), 7.56-7.53 (m, 4H), 7.13 (dd,  $J$  = 17.5, 11.5 Hz, 1H), 6.95 (d,  $J$  = 8.5 Hz, 2H), 5.27 (dd,  $J$  = 11.0, 1.5 Hz, 1H), 5.06 (dd,  $J$  = 17.5, 2.0 Hz, 1H), 3.85 (s, 3H), 0.52 (s, 9H);  $^{13}\text{C}$  NMR (125 MHz,  $\text{CDCl}_3$ )  $\delta$  162.3, 160.2, 154.9, 151.2, 141.0, 140.8, 136.4, 134.7, 131.7, 130.0, 128.9, 127.1, 120.9, 119.9, 113.7, 55.2, 1.88;  $^{11}\text{B}$  NMR (160 MHz,  $\text{CDCl}_3$ )  $\delta$  35.13; FT-IR (neat): 3403, 2954, 2898, 1601, 1499, 1407, 1234, 1179, 868, 832  $\text{cm}^{-1}$ ; HRMS (EI, 70 eV): calcd. for  $[\text{C}_{23}\text{H}_{24}\text{BClN}_2\text{O}_2\text{Si}]^+$ , 434.1389: found 434.1387.

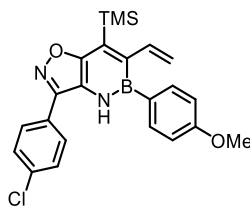

**5-(4-(*tert*-Butyl)phenyl)-3-(4-chlorophenyl)-7-(trimethylsilyl)-6-vinyl-4,5-dihydroisoxazolo[5,4-*e*][1,2]azaborinine (5d)**

Following the general procedure using 3-(4-chlorophenyl)-*N*-(4-(trimethylsilyl)but-3-yn-2-yl)isoxazol-4-amine **1a** (31.9 mg, 0.10 mmol) and potassium (4-(*tert*-butyl)phenyl)trifluoroborate (48.0 mg, 0.20 mmol), purification by PTLC (hexane : acetone = 39 : 1) afforded the desired product **5d** (18.1 mg, 0.0393 mmol, 39%) as a yellow oil. <sup>1</sup>H NMR (500 MHz, CDCl<sub>3</sub>) δ 7.80 (brs, 1H), 7.71 (d, *J* = 8.5 Hz, 2H), 7.61-7.59 (m, 2H), 7.54 (d, *J* = 8.5 Hz, 2H), 7.41-7.38 (m, 3H), 7.14 (dd, *J* = 17.5, 11 Hz, 1H), 5.26 (dd, *J* = 11.5, 2.0 Hz, 1H), 5.03 (dd, *J* = 17.5, 1.5 Hz, 1H), 0.54 (s, 9H); <sup>13</sup>C NMR (125 MHz, CDCl<sub>3</sub>) δ 162.5, 151.2, 141.3, 140.5, 136.4, 133.1, 130.0, 128.9, 128.5, 128.0, 127.0, 120.8, 120.2, 1.83; <sup>11</sup>B NMR (160 MHz, CDCl<sub>3</sub>) δ 34.41; FT-IR (neat): 3400, 2961, 2865, 1603, 1541, 1249, 1092, 869, 831 cm<sup>-1</sup>; HRMS (EI, 70 eV): calcd. for [C<sub>26</sub>H<sub>30</sub>BClN<sub>2</sub>OSi]<sup>+</sup>, 460.1909; found 460.1914.

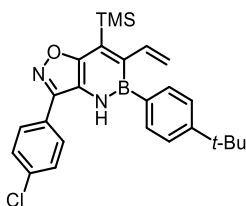

**3,5-Bis(4-chlorophenyl)-7-(trimethylsilyl)-6-vinyl-4,5-dihydroisoxazolo[5,4-*e*][1,2]azaborinine (5e)**

Following the general procedure using 3-(4-chlorophenyl)-*N*-(4-(trimethylsilyl)but-3-yn-2-yl)isoxazol-4-amine **1a** (31.9 mg, 0.10 mmol) and potassium (4-chlorophenyl)trifluoroborate (43.7 mg, 0.20 mmol),<sup>2</sup> purification by PTLC (hexane : acetone = 39 : 1) afforded the desired product **5e** (19.1 mg, 0.0434 mmol, 43%) as a brown solid. Mp 123-124 °C. <sup>1</sup>H NMR (500 MHz, CDCl<sub>3</sub>) δ 7.76 (brs, 1H), 7.70 (d, *J* = 8.5 Hz, 2H), 7.55 (d, *J* = 8.5 Hz, 2H), 7.51 (d, *J* = 8.5 Hz, 2H), 7.36 (d, *J* = 8.5 Hz, 2H), 7.09 (dd, *J* = 17.5, 11.5 Hz, 1H), 5.25 (dd, *J* = 11.5, 1.5 Hz, 1H), 4.99 (dd, *J* = 17.5, 1.5 Hz, 1H), 0.52 (s, 9H); <sup>13</sup>C NMR (125 MHz, CDCl<sub>3</sub>) δ 162.5, 151.2, 141.3, 140.5, 136.4, 133.1, 130.0, 128.9, 128.5, 128.0, 127.0, 120.8, 120.2, 1.83; <sup>11</sup>B NMR (160 MHz, CDCl<sub>3</sub>) δ 35.26; FT-IR (neat): 3398, 2954, 2927, 1588, 1433, 1409, 1250, 1091, 869, 834 cm<sup>-1</sup>; HRMS (EI, 70 eV): calcd. for [C<sub>22</sub>H<sub>21</sub>BCl<sub>2</sub>N<sub>2</sub>OSi]<sup>+</sup>, 438.0893; found 438.0883.

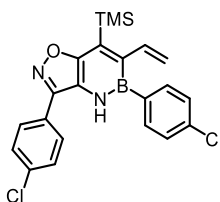

#### 4-(3-(4-Chlorophenyl)-7-(trimethylsilyl)-6-vinylisoxazolo[5,4-*e*][1,2]azaborinin-5(4*H*)-yl)benzonitrile (**5f**)

Following the general procedure using 3-(4-chlorophenyl)-*N*-(4-(trimethylsilyl)but-3-yn-2-yl)isoxazol-4-amine **1a** (31.9 mg, 0.10 mmol) and potassium (4-cyanophenyl)trifluoroborate (41.8 mg, 0.20 mmol), purification by PTLC (hexane : acetone = 39 : 1) afforded the desired product **5f** (27.8 mg, 0.0647 mmol, 65%) as a yellow solid. Mp 229-230 °C. <sup>1</sup>H NMR (500 MHz, CDCl<sub>3</sub>) δ 7.80 (brs, 1H), 7.71 (d, *J* = 8.5 Hz, 2H), 7.61-7.59 (m, 2H), 7.54 (d, *J* = 8.5 Hz, 2H), 7.41-7.38 (m, 3H), 7.14 (dd, *J* = 17.5, 11 Hz, 1H), 5.26 (dd, *J* = 11.5, 2.0 Hz, 1H), 5.03 (dd, *J* = 17.5, 1.5 Hz, 1H), 0.54 (s, 9H); <sup>13</sup>C NMR (125 MHz, CDCl<sub>3</sub>) δ 162.5, 151.2, 141.3, 140.5, 136.4, 133.1, 130.0, 128.9, 128.5, 128.0, 127.0, 120.8, 120.2, 1.83; <sup>11</sup>B NMR (160 MHz, CDCl<sub>3</sub>) δ 34.59; FT-IR (neat): 2956, 2921, 2849, 1716, 1698, 1540, 1507, 1014, 832 cm<sup>-1</sup>; HRMS (EI, 70 eV): calcd. for [C<sub>23</sub>H<sub>21</sub>BClN<sub>3</sub>OSi]<sup>+</sup>, 429.1235: found 429.1224.

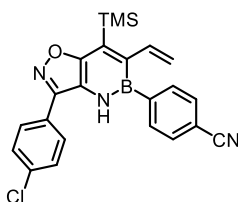

#### 5-(2-Bromophenyl)-3-(4-chlorophenyl)-7-(trimethylsilyl)-6-vinyl-4,5-dihydroisoxazolo[5,4-*e*][1,2]azaborinine (**5g**)

Following the general procedure using 3-(4-chlorophenyl)-*N*-(4-(trimethylsilyl)but-3-yn-2-yl)isoxazol-4-amine **1a** (31.9 mg, 0.10 mmol) and potassium (2-bromophenyl)trifluoroborate (52.6 mg, 0.20 mmol),<sup>2</sup> purification by PTLC (hexane : acetone = 39 : 1) afforded the desired product **5g** (13.0 mg, 0.0269 mmol, 27%) as a yellow solid. Mp 145-146 °C. <sup>1</sup>H NMR (500 MHz, CDCl<sub>3</sub>) δ 7.85 (brs, 1H), 7.71 (d, *J* = 8.5 Hz, 2H), 7.57-7.53 (m, 1H), 7.33-7.31 (m, 2H), 7.25-7.21 (m, 2H), 7.08 (dd, *J* = 17.5, 11 Hz, 1H), 5.12 (dd, *J* = 11.0, 1.5 Hz, 1H), 4.91 (dd, *J* = 17.5, 1.5 Hz, 1H), 0.54 (s, 9H); <sup>13</sup>C NMR (125 MHz, CDCl<sub>3</sub>) δ 162.5, 151.3, 141.6, 139.9, 136.5, 134.2, 132.1, 130.0, 129.9, 128.9, 126.9, 126.72, 126.65, 120.3, 119.6, 1.67; <sup>11</sup>B NMR (160 MHz, CDCl<sub>3</sub>) δ 35.10; FT-IR (neat): 3400, 2955, 2925, 1716, 1600, 1503, 1251, 1092, 1337, 1250, 869, 833 cm<sup>-1</sup>; HRMS (EI, 70 eV): calcd. for [C<sub>22</sub>H<sub>21</sub>BBrClN<sub>2</sub>OSi]<sup>+</sup>, 482.0388: found 482.0380.

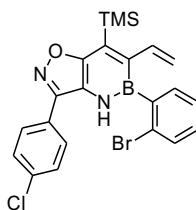

#### 3-(4-Chlorophenyl)-5-(naphthalen-2-yl)-7-(trimethylsilyl)-6-vinyl-4,5-dihydroisoxazolo[5,4-*e*][1,2]azaborinine (**5h**)

Following the general procedure using 3-(4-chlorophenyl)-*N*-(4-(trimethylsilyl)but-3-yn-2-yl)isoxazol-4-amine **1a** (31.9 mg, 0.10 mmol) and potassium 2-naphthalenyltrifluoroborate (46.8 mg, 0.20 mmol),<sup>2</sup> purification by PTLC (hexane : acetone = 39 : 1) afforded the desired product **5h** (25.0 mg, 0.0549 mmol, 55%) as a brown



oil.  $^1\text{H}$  NMR (500 MHz,  $\text{CDCl}_3$ )  $\delta$  8.06 (brs, 1H), 7.89-7.84 (m, 4H), 7.73 (d,  $J = 8.5$  Hz, 2H), 7.68 (dd,  $J = 8.5, 1.0$  Hz, 1H), 7.54 (d,  $J = 8.5, 2\text{H}$ ), 7.51-7.49 (m, 2H), 8.18 (dd,  $J = 17.5, 11.5$  Hz, 1H), 5.24 (dd,  $J = 11.5, 2.0$  Hz, 1H), 5.04 (dd,  $J = 17.5, 1.5$  Hz, 1H), 0.56 (s, 9H);  $^{13}\text{C}$  NMR (125 MHz,  $\text{CDCl}_3$ )  $\delta$  162.6, 151.3, 141.5, 140.3, 136.4, 133.4, 133.3, 132.9, 130.4, 130.0, 128.9, 128.2, 127.9, 127.04, 127.01, 126.4, 126.1, 120.9, 120.6, 1.82;  $^{11}\text{B}$  NMR (160 MHz,  $\text{CDCl}_3$ )  $\delta$  35.37; FT-IR (neat): 3400, 3052, 2956, 1598, 1545, 1467, 1250, 1092, 869, 833  $\text{cm}^{-1}$ ; HRMS (EI, 70 eV): calcd. for  $[\text{C}_{26}\text{H}_{24}\text{BClN}_2\text{OSi}]^+$ , 454.1439; found 454.1484.

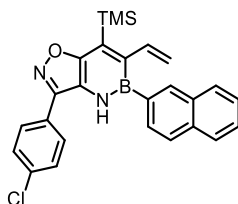

### 3-(4-Chlorophenyl)-5-(thiophen-3-yl)-7-(trimethylsilyl)-6-vinyl-4,5-dihydroisoxazolo[5,4-*e*][1,2]azaborinine (5i)

Following the general procedure using 3-(4-chlorophenyl)-*N*-(4-(trimethylsilyl)but-3-yn-2-yl)isoxazol-4-amine **1a** (31.9 mg, 0.10 mmol) and potassium 3-thienyltrifluoroborate (38.0 mg, 0.20 mmol),<sup>2</sup> purification by PTLC (hexane : acetone = 39 : 1) afforded the desired product **5i** (18.8 mg, 0.0458 mmol, 46%) as a yellow solid. Mp 97-98 °C.  $^1\text{H}$  NMR (500 MHz,  $\text{CDCl}_3$ )  $\delta$  7.80 (brs, 1H), 7.72 (d,  $J = 8.5$  Hz, 2H), 7.64 (dd,  $J = 2.5, 1.0$  Hz, 1H), 7.56 (d,  $J = 8.0$  Hz, 2H), 7.41 (dd,  $J = 5.0, 3.0$  Hz, 1H), 7.35 (dd,  $J = 4.5, 1.0$  Hz, 1H), 7.15 (dd,  $J = 17.5, 11$  Hz, 1H), 5.26 (dd,  $J = 11.5, 2.0$  Hz, 1H), 5.03 (dd,  $J = 17.5, 1.5$  Hz, 1H), 0.54 (s, 9H);  $^{13}\text{C}$  NMR (125 MHz,  $\text{CDCl}_3$ )  $\delta$  162.4, 151.2, 141.2, 141.0, 136.5, 131.7, 131.1, 130.0, 128.9, 127.0, 125.6, 120.8, 119.6, 1.88;  $^{11}\text{B}$  NMR (160 MHz,  $\text{CDCl}_3$ )  $\delta$  32.51; FT-IR (neat): 3404, 2954, 2897, 1600, 1542, 1434, 1249, 1091, 869, 833  $\text{cm}^{-1}$ ; HRMS (EI, 70 eV): calcd. for  $[\text{C}_{20}\text{H}_{20}\text{BClN}_2\text{OSSi}]^+$ , 410.0847; found 410.0848.

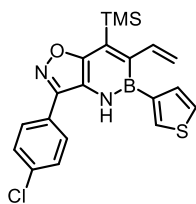

### 3-(4-Chlorophenyl)-5-methyl-7-(trimethylsilyl)-6-vinyl-4,5-dihydroisoxazolo[5,4-*e*][1,2]azaborinine (5j)

Following the general procedure using 3-(4-chlorophenyl)-*N*-(4-(trimethylsilyl)but-3-yn-2-yl)isoxazol-4-amine **1a** (31.9 mg, 0.10 mmol) and potassium trifluoro(methyl)borate (24.3 mg, 0.20 mmol), purification by PTLC (hexane : acetone = 39 : 1) afforded the desired product **5j** (17.3 mg, 0.0504 mmol, 50%) as a brown oil.  $^1\text{H}$  NMR (400 MHz,  $\text{CDCl}_3$ )  $\delta$  7.71 (d,  $J = 8.4$  Hz, 2H), 7.57-7.55 (m, 3H), 7.08 (dd,  $J = 17.6, 11.2$  Hz, 1H), 5.39 (dd,  $J = 11.6, 2.0$  Hz, 1H), 5.25 (dd,  $J = 18.0, 2.0$  Hz, 1H), 0.79 (s, 3H), 0.49 (s, 9H);  $^{13}\text{C}$  NMR (125 MHz,  $\text{CDCl}_3$ )  $\delta$  162.2, 150.9, 141.2, 139.5, 136.3, 129.9, 128.9, 127.3, 120.5, 118.3, 1.69;  $^{11}\text{B}$  NMR (128 MHz,  $\text{CDCl}_3$ )  $\delta$  37.26; FT-IR (neat): 3410, 2955, 2898, 1601, 1548, 1409, 1251, 1093, 920, 833  $\text{cm}^{-1}$ ; HRMS (EI, 70 eV): calcd. for  $[\text{C}_{17}\text{H}_{20}\text{BClN}_2\text{OSi}]^+$ , 342.1126; found 342.1118.

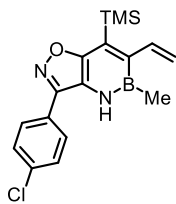

### 3-(4-Chlorophenyl)-5-cyclopropyl-7-(trimethylsilyl)-6-vinyl-4,5-dihydroisoxazolo[5,4-*e*][1,2]azaborinine (**5k**)

Following the general procedure using 3-(4-chlorophenyl)-*N*-(4-(trimethylsilyl)but-3-yn-2-yl)isoxazol-4-amine **1a** (31.9 mg, 0.10 mmol) and potassium cyclopropyltrifluoroborate (29.6 mg, 0.20 mmol), purification by PTLC (hexane : acetone = 39 : 1) afforded the desired product **5k** (12.8 mg, 0.0347 mmol, 35%) as a yellow solid. Mp 119-120 °C. <sup>1</sup>H NMR (500 MHz, CDCl<sub>3</sub>) δ 7.65 (d, *J* = 9.0 Hz, 2H), 7.56 (d, *J* = 8.5 Hz, 2H), 7.15 (dd, *J* = 18.0, 11.5 Hz, 1H), 7.04 (brs, 1H), 5.48 (dd, *J* = 18.0, 2.0 Hz, 1H), 5.44 (dd, *J* = 11.0, 2.0 Hz, 1H), 0.88-0.84 (m, 2H), 0.63-0.58 (m, 1H), 0.49 (s, 9H), 0.45-0.42 (m, 2H); <sup>13</sup>C NMR (125 MHz, CDCl<sub>3</sub>) δ 162.0, 150.9, 140.7, 139.3, 136.3, 120.3, 118.9, 6.86, 1.68; <sup>11</sup>B NMR (160 MHz, CDCl<sub>3</sub>) δ 36.90; FT-IR (neat): 3412, 3071, 2957, 1600, 1541, 1500, 1409, 1251, 1093, 867, 833 cm<sup>-1</sup>; HRMS (EI, 70 eV): calcd. for [C<sub>19</sub>H<sub>22</sub>BClN<sub>2</sub>OSi]<sup>+</sup>, 368.1283; found 368.1274.

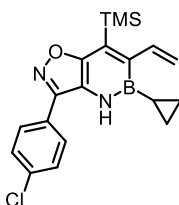

### 3-(4-Chlorophenyl)-7-(trimethylsilyl)-5,6-divinyl-4,5-dihydroisoxazolo[5,4-*e*][1,2]azaborinine (**5l**)

Following the general procedure using 3-(4-chlorophenyl)-*N*-(4-(trimethylsilyl)but-3-yn-2-yl)isoxazol-4-amine **1a** (31.9 mg, 0.10 mmol) and potassium trifluoro(vinyl)borate (26.8 mg, 0.20 mmol), purification by PTLC (hexane : acetone = 39 : 1) afforded the desired product **5l** (25.8 mg, 0.0727 mmol, 73%) as a brown solid. Mp 110-111 °C. <sup>1</sup>H NMR (500 MHz, CDCl<sub>3</sub>) δ 7.79 (brs, 1H), 7.72 (d, *J* = 8.5 Hz, 2H), 7.57 (d, *J* = 8.5 Hz, 2H), 7.13 (dd, *J* = 17.5, 11.5 Hz, 1H), 6.73-6.66 (m, 1H), 5.85-5.81 (m, 2H), 5.44 (dd, *J* = 11.0, 1.5 Hz, 1H), 5.31 (dd, *J* = 18.0, 2.0 Hz, 1H), 0.502 (s, 9H); <sup>13</sup>C NMR (125 MHz, CDCl<sub>3</sub>) δ 162.5, 151.2, 140.8, 140.2, 139.2, 136.4, 130.0, 128.9, 128.2, 127.1, 120.5, 119.6, 1.60; <sup>11</sup>B NMR (160 MHz, CDCl<sub>3</sub>) δ 32.28; FT-IR (neat): 3406, 3049, 2953, 1601, 1541, 1499, 1404, 1250, 1092, 1011, 868, 832 cm<sup>-1</sup>; HRMS (EI, 70 eV): calcd. for [C<sub>18</sub>H<sub>20</sub>BClN<sub>2</sub>OSi]<sup>+</sup>, 354.1126; found 354.1132.

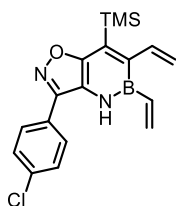

### 3-(4-Chlorophenyl)-5-(prop-1-en-2-yl)-7-(trimethylsilyl)-6-vinyl-4,5-dihydroisoxazolo[5,4-*e*][1,2]azaborinine

**(5m)**

Following the general procedure using 3-(4-chlorophenyl)-*N*-(4-(trimethylsilyl)but-3-yn-2-yl)isoxazol-4-amine **1a** (31.9 mg, 0.10 mmol) and potassium trifluoro(prop-1-en-2-yl)borate (29.6 mg, 0.20 mmol), purification by PTLC (hexane : acetone = 39 : 1) afforded the desired product **5m** (29.1 mg, 0.0790 mmol, 79%) as a brown solid. Mp 105-106 °C. <sup>1</sup>H NMR (500 MHz, CDCl<sub>3</sub>) δ 7.71 (d, *J* = 8.5 Hz, 2H), 7.67 (brs, 1H), 7.55 (d, *J* = 8.5 Hz, 2H), 7.14 (dd, *J* = 17.5, 11.0 Hz, 1H), 5.46-5.45 (m, 1H), 5.42 (dd, *J* = 17.5, 2.0 Hz, 1H), 5.33 (dd, *J* = 11.0, 1.5 Hz, 1H), 5.28-5.27 (m, 1H), 1.98 (t, *J* = 1.5 Hz, 3H), 0.50 (s, 9H); <sup>13</sup>C NMR (125 MHz, CDCl<sub>3</sub>) δ 162.4, 151.1, 140.8, 140.7, 136.4, 130.0, 128.9, 127.1, 122.6, 120.3, 119.1, 23.2, 1.77; <sup>11</sup>B NMR (160 MHz, CDCl<sub>3</sub>) δ 34.43; FT-IR (neat): 3410, 2953, 2899, 1601, 1541, 1500, 1408, 1251, 1093, 870, 834 cm<sup>-1</sup>; HRMS (EI, 70 eV): calcd. for [C<sub>19</sub>H<sub>22</sub>BClN<sub>2</sub>OSi]<sup>+</sup>, 368.1283: found 468.1274.

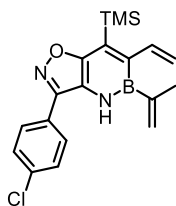**3,5-Diphenyl-7-(trimethylsilyl)-6-vinyl-4,5-dihydroisoxazolo[5,4-*e*][1,2]azaborinine (5n)**

Following the general procedure using 3-phenyl-*N*-(4-(trimethylsilyl)but-3-yn-2-yl)isoxazol-4-amine **1b** (28.4 mg, 0.10 mmol) and potassium phenyltrifluoroborate (36.8 mg, 0.20 mmol), purification by PTLC (hexane : acetone = 39 : 1) afforded the desired product **5n** (29.3 mg, 0.0791 mmol, 79%) as a brown solid. Mp 95-96 °C. <sup>1</sup>H NMR (500 MHz, CDCl<sub>3</sub>) δ 7.80 (brs, 1H), 7.71 (d, *J* = 8.5 Hz, 2H), 7.61-7.59 (m, 2H), 7.54 (d, *J* = 8.5 Hz, 2H), 7.41-7.38 (m, 3H), 7.14 (dd, *J* = 17.5, 11.0 Hz, 1H), 5.26 (dd, *J* = 11.5, 2.0 Hz, 1H), 5.03 (dd, *J* = 17.5, 1.5 Hz, 1H), 0.54 (s, 9H); <sup>13</sup>C NMR (125 MHz, CDCl<sub>3</sub>) δ 162.5, 151.2, 141.3, 140.5, 136.4, 133.1, 130.0, 128.9, 128.5, 128.0, 127.0, 120.8, 120.2, 1.83; <sup>11</sup>B NMR (160 MHz, CDCl<sub>3</sub>) δ 34.45; FT-IR (neat): 3403, 2954, 2897, 1541, 1458, 1395, 1250, 1234, 868, 841 cm<sup>-1</sup>; HRMS (EI, 70 eV): calcd. for [C<sub>22</sub>H<sub>23</sub>BN<sub>2</sub>OSi]<sup>+</sup>, 370.1673: found 370.1674.

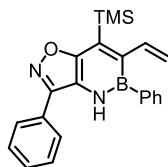**5-Phenyl-3-(*p*-tolyl)-7-(trimethylsilyl)-6-vinyl-4,5-dihydroisoxazolo[5,4-*e*][1,2]azaborinine (5o)**

Following the general procedure using 3-(*p*-tolyl)-*N*-(4-(trimethylsilyl)but-3-yn-2-yl)isoxazol-4-amine **1c** (29.8 mg, 0.10 mmol) and potassium phenyltrifluoroborate (36.8 mg, 0.20 mmol), purification by PTLC (hexane : acetone = 39 : 1) afforded the desired product **5o** (26.0 mg, 0.0725 mmol, 73%) as a brown solid. Mp 75-76 °C. <sup>1</sup>H NMR (500 MHz, CDCl<sub>3</sub>) δ 7.80 (brs, 1H), 7.71 (d, *J* = 8.5 Hz, 2H), 7.61-7.59 (m, 2H), 7.54 (d, *J* = 8.5 Hz, 2H), 7.41-7.38 (m, 3H), 7.14 (dd, *J* = 17.5, 11.0 Hz, 1H), 5.26 (dd, *J* = 11.5, 2.0 Hz, 1H), 5.03 (dd, *J* = 17.5, 1.5 Hz, 1H), 0.54 (s, 9H); <sup>13</sup>C NMR (125 MHz, CDCl<sub>3</sub>) δ 162.5, 151.2, 141.3, 140.5, 136.4, 133.1, 130.0, 128.9, 128.5, 128.0, 127.0, 120.8, 120.2, 1.83; <sup>11</sup>B NMR (160 MHz, CDCl<sub>3</sub>) δ 34.71; FT-IR (neat): 3406, 2954, 2898, 1556, 1519, 1436,

1250, 1235, 869, 841  $\text{cm}^{-1}$ ; HRMS (EI, 70 eV): calcd. for  $[\text{C}_{23}\text{H}_{25}\text{BN}_2\text{OSi}]^+$ , 384.1829: found 384.1839.

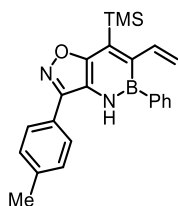

### 3-(4-Methoxyphenyl)-5-phenyl-7-(trimethylsilyl)-6-vinyl-4,5-dihydroisoxazolo[5,4-*e*][1,2]azaborinine (**5p**)

Following the general procedure using 3-(4-methoxyphenyl)-*N*-(4-(trimethylsilyl)but-3-yn-2-yl)isoxazol-4-amine **1d** (31.4 mg, 0.10 mmol) and potassium phenyltrifluoroborate (36.8 mg, 0.20 mmol), purification by PTLC (hexane : acetone = 39 : 1) afforded the desired product **5p** (29.4 mg, 0.0785 mmol, 79%) as an orange oil.  $^1\text{H}$  NMR (500 MHz,  $\text{CDCl}_3$ )  $\delta$  7.80 (brs, 1H), 7.71 (d,  $J = 8.5$  Hz, 2H), 7.61-7.59 (m, 2H), 7.54 (d,  $J = 8.5$  Hz, 2H), 7.41-7.38 (m, 3H), 7.14 (dd,  $J = 17.5, 11.0$  Hz, 1H), 5.26 (dd,  $J = 11.5, 2.0$  Hz, 1H), 5.03 (dd,  $J = 17.5, 1.5$  Hz, 1H), 0.54 (s, 9H);  $^{13}\text{C}$  NMR (125 MHz,  $\text{CDCl}_3$ )  $\delta$  162.5, 151.2, 141.3, 140.5, 136.4, 133.1, 130.0, 128.9, 128.5, 128.0, 127.0, 120.8, 120.2, 1.83;  $^{11}\text{B}$  NMR (160 MHz,  $\text{CDCl}_3$ )  $\delta$  34.83; FT-IR (neat): 3404, 2955, 2898, 1613, 1518, 1434, 1252, 1175, 868, 835  $\text{cm}^{-1}$ ; HRMS (EI, 70 eV): calcd. for  $[\text{C}_{23}\text{H}_{25}\text{BClN}_2\text{O}_2\text{Si}]^+$ , 400.1778: found 400.1786.

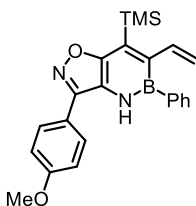

### 3-(*tert*-Butyl)-5-phenyl-7-(trimethylsilyl)-6-vinyl-4,5-dihydroisoxazolo[5,4-*e*][1,2]azaborinine (**5q**)

Following the general procedure using 3-(*tert*-butyl)-*N*-(4-(trimethylsilyl)but-3-yn-2-yl)isoxazol-4-amine **1e** (26.4 mg, 0.10 mmol) and potassium phenyltrifluoroborate (36.8 mg, 0.20 mmol), purification by PTLC (hexane : acetone = 39 : 1) afforded the desired product **5q** (30.0 mg, 0.0856 mmol, 86%) as a yellow solid. Mp 125-126  $^\circ\text{C}$ .  $^1\text{H}$  NMR (500 MHz,  $\text{CDCl}_3$ )  $\delta$  7.68 (brs, 1H), 7.60-7.59 (m, 2H), 7.42-7.40 (m, 3H), 7.10 (dd,  $J = 17.5, 11.0$  Hz, 1H), 5.21 (d,  $J = 11.0$  Hz, 1H), 4.98 (d,  $J = 17.5$ , 1H), 1.52 (s, 9H), 0.49 (s, 9H);  $^{13}\text{C}$  NMR (125 MHz,  $\text{CDCl}_3$ )  $\delta$  161.7, 159.4, 141.3, 140.6, 133.2, 128.3, 128.0, 120.9, 119.8, 32.9, 28.9, 1.87;  $^{11}\text{B}$  NMR (160 MHz,  $\text{CDCl}_3$ )  $\delta$  34.11; FT-IR (neat): 3429, 2961, 2902, 1538, 1395, 1250, 1238, 869, 840  $\text{cm}^{-1}$ ; HRMS (EI, 70 eV): calcd. for  $[\text{C}_{20}\text{H}_{27}\text{BClN}_2\text{OSi}]^+$ , 350.1986: found 350.1981.

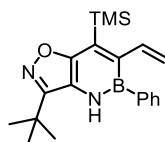

### 3-Pentyl-5-phenyl-7-(trimethylsilyl)-6-vinyl-4,5-dihydroisoxazolo[5,4-*e*][1,2]azaborinine (**5r**)

Following the general procedure using 3-pentyl-*N*-(4-(trimethylsilyl)but-3-yn-2-yl)isoxazol-4-amine **1f** (27.8 mg, 0.10 mmol) and potassium phenyltrifluoroborate (36.8 mg, 0.20 mmol), purification by PTLC (hexane :

acetone = 39 : 1) afforded the desired product **5r** (11.7 mg, 0.0321 mmol, 32%) as a yellow oil. <sup>1</sup>H NMR (500 MHz, CDCl<sub>3</sub>) δ 7.59-7.55 (m, 3H), 7.42-7.37 (m, 3H), 7.10 (dd, *J* = 17.5, 11.0 Hz, 1H), 5.20 (dd, *J* = 11.0, 2.0 Hz, 1H), 4.98 (dd, *J* = 17.5, 2.0 Hz, 1H), 2.84 (t, *J* = 7.5 Hz, 2H), 1.80 (quint, *J* = 7.5 Hz, 2H), 1.45-1.34 (m, 4H), 0.91 (t, *J* = 7.0 Hz, 3H), 0.48 (s, 9H); <sup>13</sup>C NMR (125 MHz, CDCl<sub>3</sub>) δ 161.2, 153.0, 141.2, 140.7, 133.1, 128.3, 128.0, 121.8, 119.9, 31.7, 27.4, 24.5, 22.5, 14.1, 1.82; <sup>11</sup>B NMR (160 MHz, CDCl<sub>3</sub>) δ 34.62; FT-IR (neat): 3254, 2955, 2929, 1541, 1507, 1435, 1405, 1249, 867, 842 cm<sup>-1</sup>; HRMS (EI, 70 eV): calcd. for [C<sub>21</sub>H<sub>29</sub>BClN<sub>2</sub>OSi]<sup>+</sup>, 364.2142: found 364.2131.

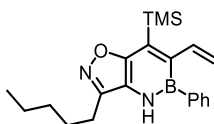

**(E)-3-(4-Chlorophenyl)-6-(pent-1-en-1-yl)-5-phenyl-7-(trimethylsilyl)-4,5-dihydroisoxazolo[5,4-e][1,2]azaborinine (5s)**

Following the general procedure using 3-(4-chlorophenyl)-*N*-(1-(trimethylsilyl)hept-1-yn-3-yl)isoxazol-4-amine **1g** (36.1 mg, 0.10 mmol) and potassium phenyltrifluoroborate (36.8 mg, 0.20 mmol), purification by PTLC (hexane : acetone = 39 : 1) afforded the desired product **5s** (28.1 mg, 0.0628 mmol, 63%) as a yellow oil. <sup>1</sup>H NMR (500 MHz, CDCl<sub>3</sub>) δ 7.75 (brs, 1H), 7.71 (d, *J* = 8.5 Hz, 2H), 7.58-7.53 (m, 4H), 7.41-7.35 (m, 3H), 6.74 (d, *J* = 15.5 Hz, 1H), 5.43 (dt, *J* = 15.5, 7.0 Hz, 1H), 2.06-2.02 (m, 2H), 1.35-1.31 (m, 2H), 0.84 (t, *J* = 7.5 Hz, 3H), 0.52 (s, 9H); <sup>13</sup>C NMR (125 MHz, CDCl<sub>3</sub>) δ 162.5, 151.2, 141.3, 140.5, 136.4, 133.1, 130.0, 128.9, 128.5, 128.0, 127.0, 120.8, 120.2, 1.83; <sup>11</sup>B NMR (160 MHz, CDCl<sub>3</sub>) δ 35.04; FT-IR (neat): 2956, 2925, 1716, 1698, 1541, 1507, 1456, 1338, 1249, 835cm<sup>-1</sup>; HRMS (EI, 70 eV): calcd. for [C<sub>25</sub>H<sub>28</sub>BClN<sub>2</sub>OSi]<sup>+</sup>, 446.1752: found 446.1750.

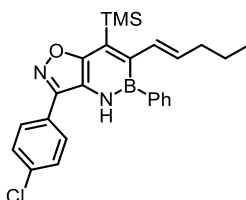

**(E)-3-(4-Chlorophenyl)-5-phenyl-6-styryl-7-(trimethylsilyl)-4,5-dihydroisoxazolo[5,4-e][1,2]azaborinine (5t)**

Following the general procedure using 3-(4-chlorophenyl)-*N*-(1-phenyl-4-(trimethylsilyl)but-3-yn-2-yl)isoxazol-4-amine **1h** (39.5 mg, 0.10 mmol) and potassium phenyltrifluoroborate (36.8 mg, 0.20 mmol), purification by PTLC (hexane : acetone = 39 : 1) afforded the desired product **5t** (31.3 mg, 0.0651 mmol, 65%) as a yellow solid. Mp 158-160 °C. <sup>1</sup>H NMR (400 MHz, CDCl<sub>3</sub>) δ 7.83 (brs, 1H), 7.73 (d, *J* = 8.4 Hz, 2H), 7.63-7.60 (m, 2H), 7.56-7.52 (m, 3H), 7.41-7.39 (m, 3H), 7.32-7.23 (m, 6H), 6.38 (d, *J* = 16.4 Hz, 1H), 0.57 (s, 9H); <sup>13</sup>C NMR (125 MHz, CDCl<sub>3</sub>) δ 162.7, 151.2, 141.2, 137.6, 136.4, 135.1, 133.1, 132.6, 130.0, 129.0, 128.89, 128.84, 128.65, 128.58, 128.2, 127.7, 127.0, 126.5, 120.8, 1.88; <sup>11</sup>B (160 MHz, CDCl<sub>3</sub>) δ 35.26; FT-IR (neat): 2954, 2923, 1748, 1716, 1540, 1507, 1456, 1338, 1092, 835 cm<sup>-1</sup>; HRMS (EI, 70 eV): calcd. for [C<sub>28</sub>H<sub>26</sub>BClN<sub>2</sub>OSi]<sup>+</sup>, 480.1596: found 480.1590.

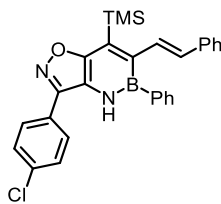

**3-(4-Chlorophenyl)-7-(dimethyl(phenyl)silyl)-5-phenyl-6-vinyl-4,5-dihydroisoxazolo[5,4-*e*][1,2]azaborinine (5u)**

Following the general procedure using 3-(4-chlorophenyl)-*N*-(4-(dimethyl(phenyl)silyl)but-3-yn-2-yl)isoxazol-4-amine **1i** (38.1 mg, 0.10 mmol) and potassium phenyltrifluoroborate (36.8 mg, 0.20 mmol), purification by PTLC (hexane : acetone = 39 : 1) afforded the desired product **5u** (19.3 mg, 0.0411 mmol, 41%) as a brown oil. <sup>1</sup>H NMR (500 MHz, CDCl<sub>3</sub>) δ 7.81 (brs, 1H), 7.72 (d, *J* = 8.5 Hz, 2H), 7.65-7.63 (m, 2H), 7.56-7.53 (m, 4H), 7.38-7.35 (m, 6H), 6.90 (dd, *J* = 17.5, 11.0 Hz, 1H), 5.06 (dd, *J* = 11.3, 2.0 Hz, 1H), 4.90 (dd, *J* = 17.5, 2.0 Hz, 1H), 0.80 (s, 6H); <sup>13</sup>C NMR (125 MHz, CDCl<sub>3</sub>) δ 162.6, 151.3, 140.3, 139.1, 138.7, 136.5, 134.0, 133.1, 130.0, 129.3, 128.9, 128.5, 128.1, 128.0, 127.0, 121.0, 120.6, 0.75; <sup>11</sup>B (160 MHz, CDCl<sub>3</sub>) δ 35.35; FT-IR (neat): 3013, 2956, 2927, 1716, 1683, 1540, 1507, 1260, 913, 813 cm<sup>-1</sup>; HRMS (EI, 70 eV): calcd. for [C<sub>27</sub>H<sub>24</sub>BClN<sub>2</sub>OSi]<sup>+</sup>, 466.1439: found 466.1444.

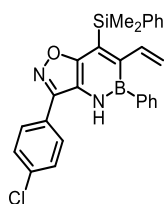

**6. Synthesis of oxazine-fused azaborine 6 via methylene insertion into N-O bond of isoxazoloazaborine 5a**  
**8-(4-Chlorophenyl)-2-phenyl-4-(trimethylsilyl)-3-vinyl-2,6-dihydro-1H-[1,2]azaborinino[6,5-*e*][1,3]oxazine (6)**

To a stirred solution of isoxazoloazaborine **5a** (40.5 mg, 0.10 mmol, 1.0 equiv.) in CH<sub>2</sub>Cl<sub>2</sub> (1 mL), diethylzinc (500 μL, 0.50 mmol, 5 equiv.) was added under an argon atmosphere at 0 °C. After being stirred at 0 °C for 15 min, diiodomethane (80.4 μL, 1.0 mmol, 10 equiv.) was added in dropwise under 0 °C, then the reaction mixture was warmed to room temperature. After being stirred at room temperature for 24 h, saturated aq. NHCl<sub>4</sub> was added to the reaction mixture. The aqueous layer was extracted with two portions of CH<sub>2</sub>Cl<sub>2</sub>. The combined extract was washed with brine, dried over MgSO<sub>4</sub> and concentrated *in vacuo*. The residue was purified by column chromatography on silica gel with hexane : ethyl acetate = 8 : 2 to give the desired compound **6** (20.0 mg, 0.048 mmol, 48%) as a yellow solid. Mp 168-169 °C. <sup>1</sup>H NMR (500 MHz, CDCl<sub>3</sub>) δ 7.59 (d, *J* = 8.5 Hz, 2H), 7.48-7.47 (m, 4H), 7.42 (brs, 1H), 7.35-7.31 (m, 3H), 7.08 (dd, *J* = 17.5, 11.5 Hz, 1H), 5.42 (s, 2H), 5.17 (dd, *J* = 11.0, 1.5 Hz, 1H), 4.96 (dd, *J* = 17.5, 1.5 Hz, 1H), 0.38 (s, 9H); <sup>13</sup>C NMR (125 MHz, CDCl<sub>3</sub>) δ 160.6, 151.6, 147.1, 141.0, 137.1, 133.2, 133.1, 130.2, 129.5, 128.2, 127.9, 119.3, 119.0, 78.6, 2.69; <sup>11</sup>B NMR (160 MHz, CDCl<sub>3</sub>) δ 32.36; FT-IR (neat): 3390, 3003, 2954, 1617, 1508, 1387, 1246, 1015, 916, 835 cm<sup>-1</sup>; HRMS (EI, 70 eV): calcd. for [C<sub>27</sub>H<sub>24</sub>BClN<sub>2</sub>OSi]<sup>+</sup>, 418.1439:

found 418.1445.

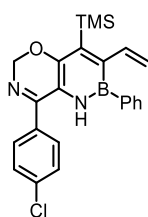

## 7. References

1. M. Tsuda, T. Morita, S. Fukuhara, H. Nakamura, *Org. Biomol. Chem.* 2021, **31**, 387-397.
2. G. A. Molander, B. Biolatto, *Org. Lett.* 2002, **4**, 1867-1870.
3. X. Z. Wang, J. Jia, Y. Zhang, W. R. Xu, W. Liu, F. N. Shi, J. W. Wang, *J. Chin. Chem. Soc.* 2007, **54**, 643-652.
4. E. J. Hanan, A. van Abbema, K. Barrett, W. S. Blair, J. Blaney, C. Chang, C. Eigenbrot, S. Flynn, P. Gibbons, C. A. Hurley, J. R. Kenny, J. Kulagowski, L. Lee, S. R. Magnuson, C. Morris, J. Murray, R. M. Pastor, T. Rawson, M. Siu, M. Ultsch, A. Zhou, D. Sampath, J. P. Lyssikatos, *J. Med. Chem.* 2012, **55**, 10090-10107.
5. T. Morita, S. Fuse, H. Nakamura, *Angew. Chem. Int. Ed.* 2016, **55**, 13580-13584.
6. P. R. Golubev, A. S. Pankova, M. A. Kuznetsov, *Eur. J. Org. Chem.* 2014, **17**, 3614-3621.

## 8. NMR spectra

### 3-(4-Methoxyphenyl)isoxazol-4-amine

$^1\text{H}$  NMR (500 MHz,  $\text{CDCl}_3$ )

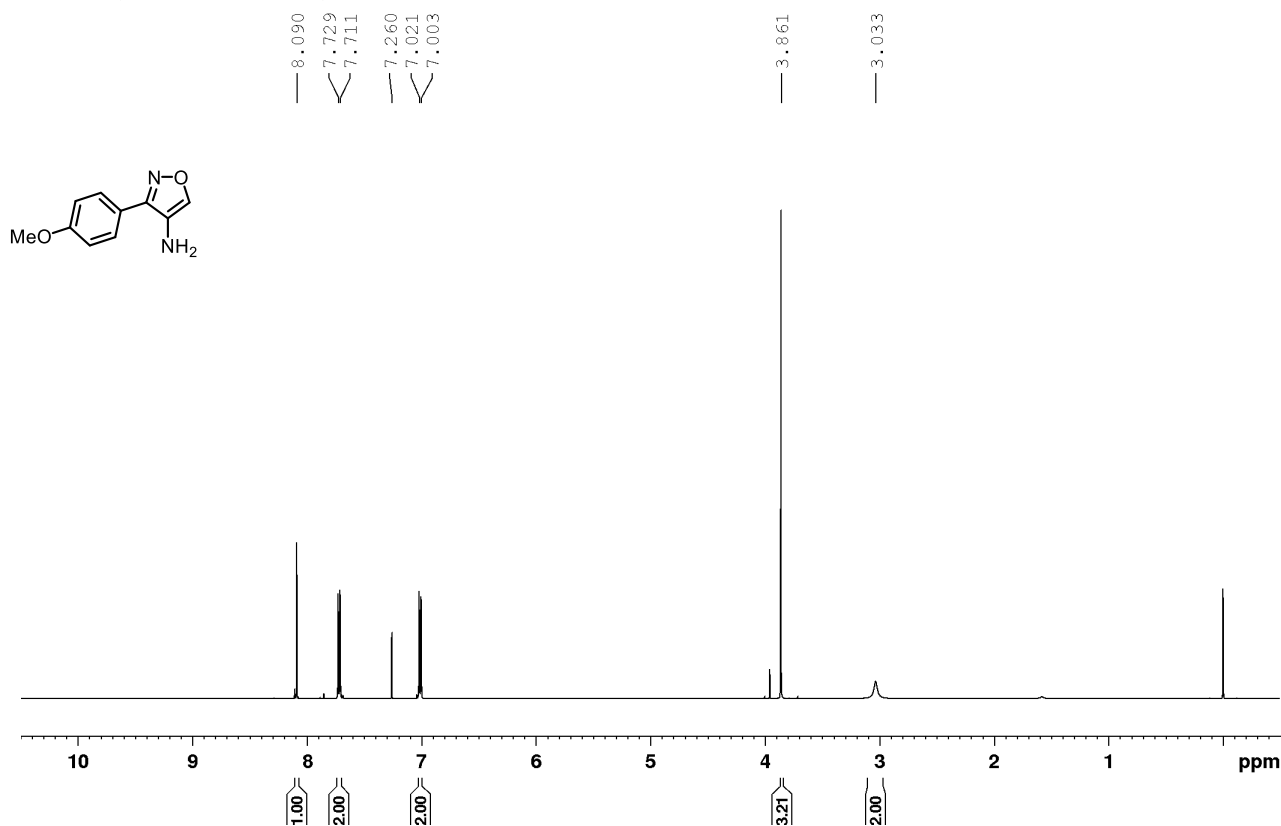

$^{13}\text{C}$  NMR (125 MHz,  $\text{CDCl}_3$ )

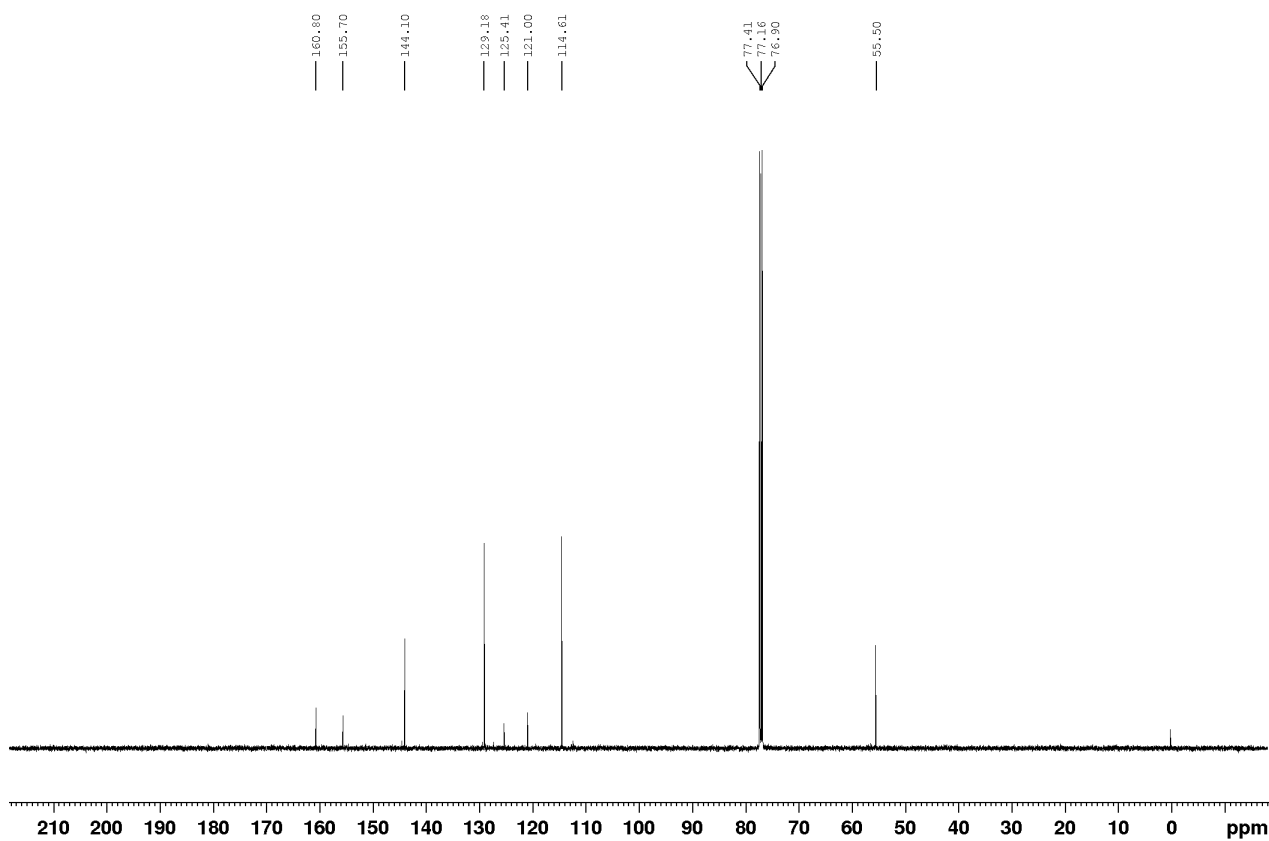



**3-(4-Methoxyphenyl)-N-(1-phenyl-3-(trimethylsilyl)prop-2-yn-1-yl)isoxazol-4-amine (1d)**

**<sup>1</sup>H NMR (400 MHz, CDCl<sub>3</sub>)**

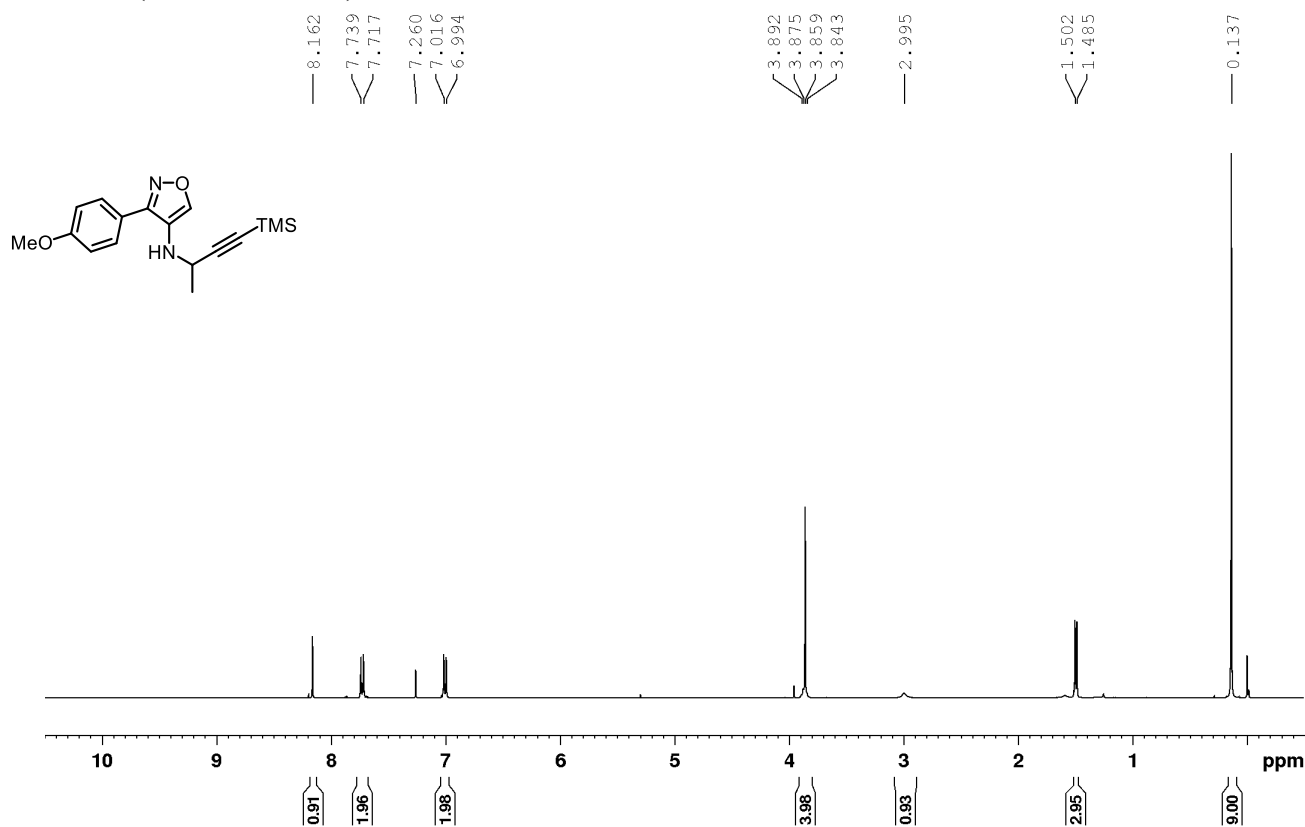

**<sup>13</sup>C NMR (100 MHz, CDCl<sub>3</sub>)**

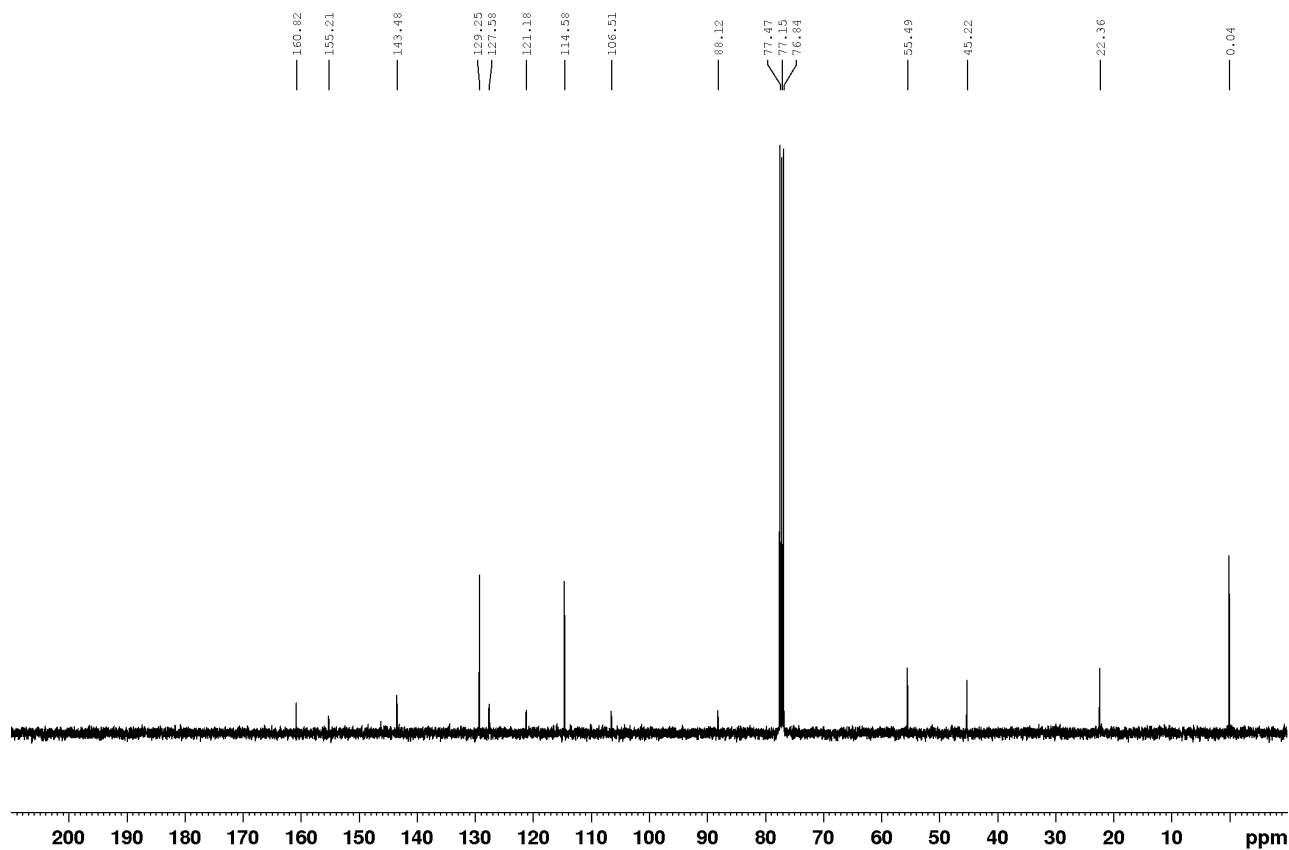

3-Pentyl-N-(4-(trimethylsilyl)but-3-yn-2-yl)isoxazol-4-amine (1f)

<sup>1</sup>H NMR (400 MHz, CDCl<sub>3</sub>)

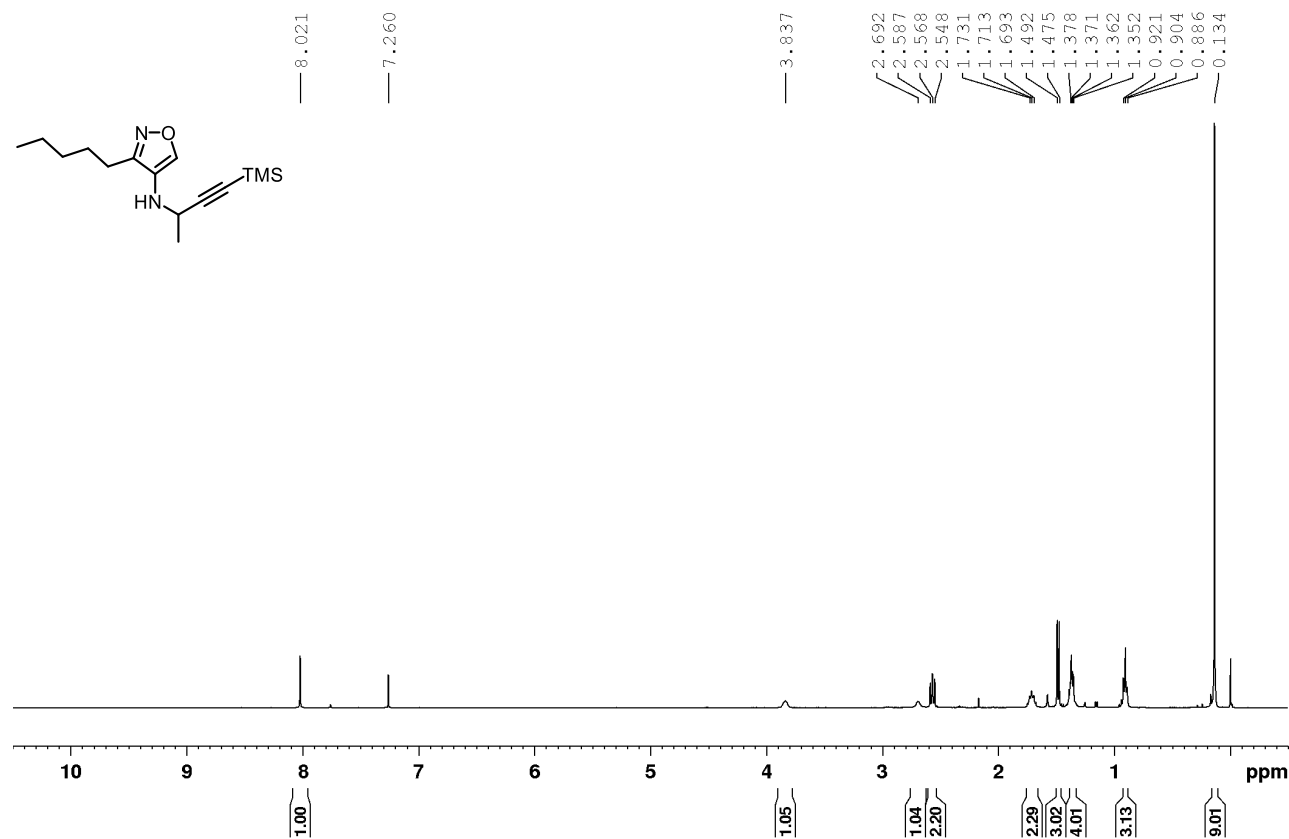

<sup>13</sup>C NMR (100 MHz, CDCl<sub>3</sub>)

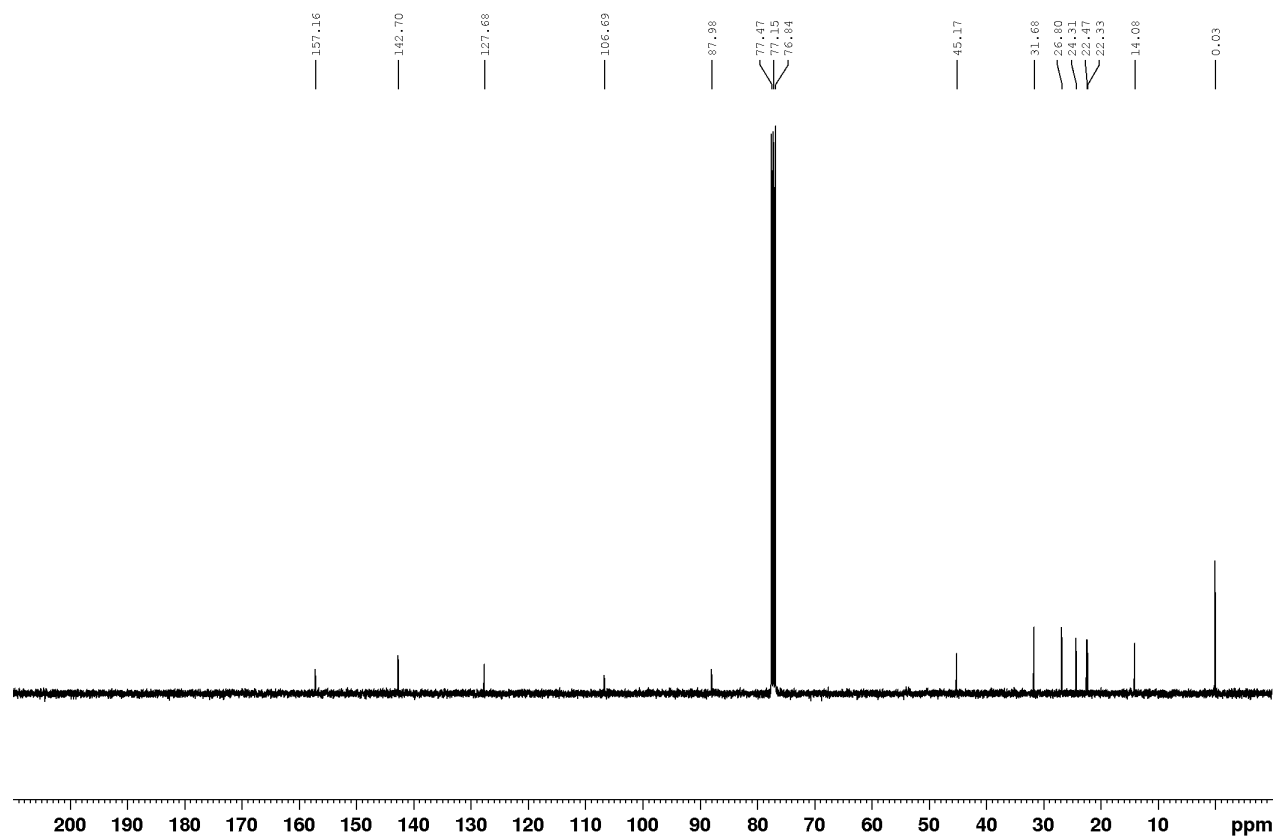

**3-(4-Chlorophenyl)-N-(1-phenyl-4-(trimethylsilyl)but-3-yn-2-yl)isoxazol-4-amine (1h)**

**<sup>1</sup>H NMR (500 MHz, CDCl<sub>3</sub>)**

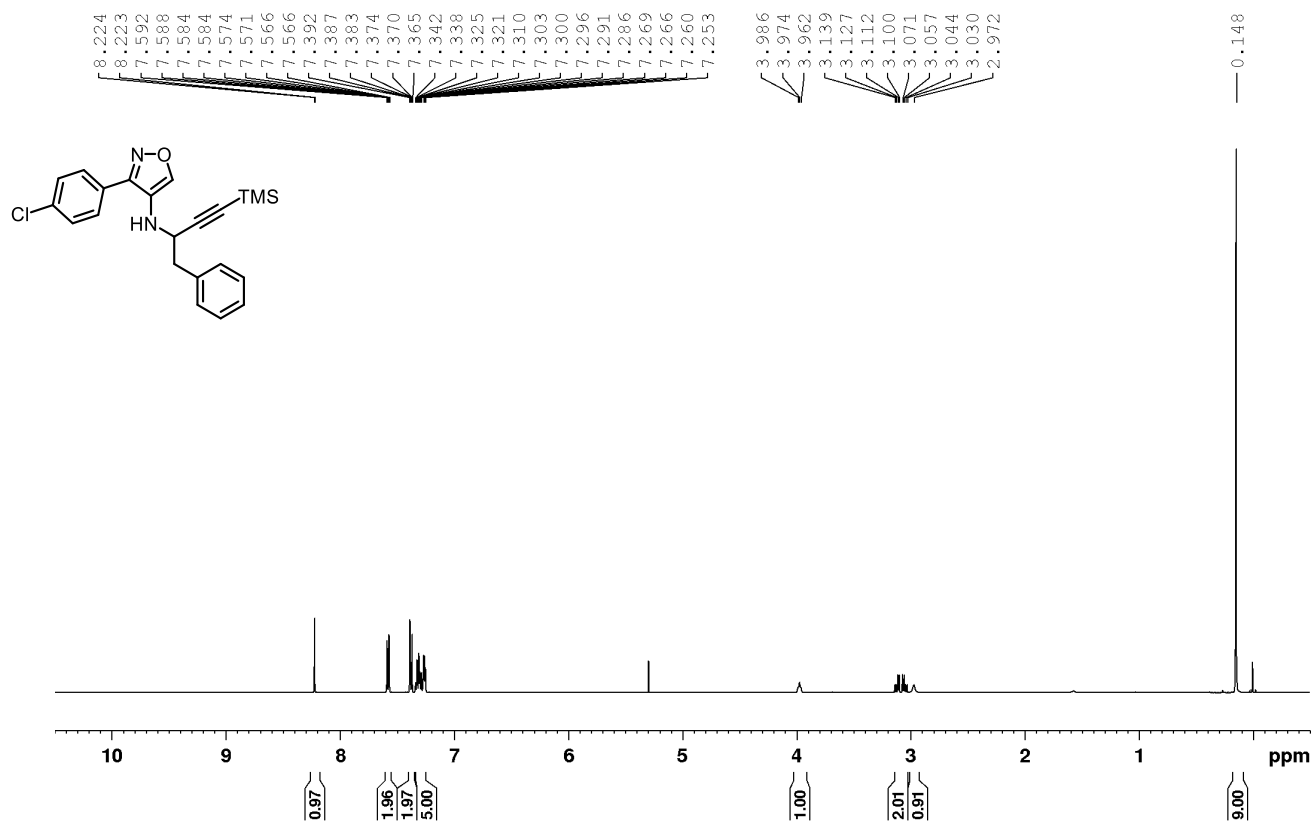

**<sup>13</sup>C NMR (125 MHz, CDCl<sub>3</sub>)**

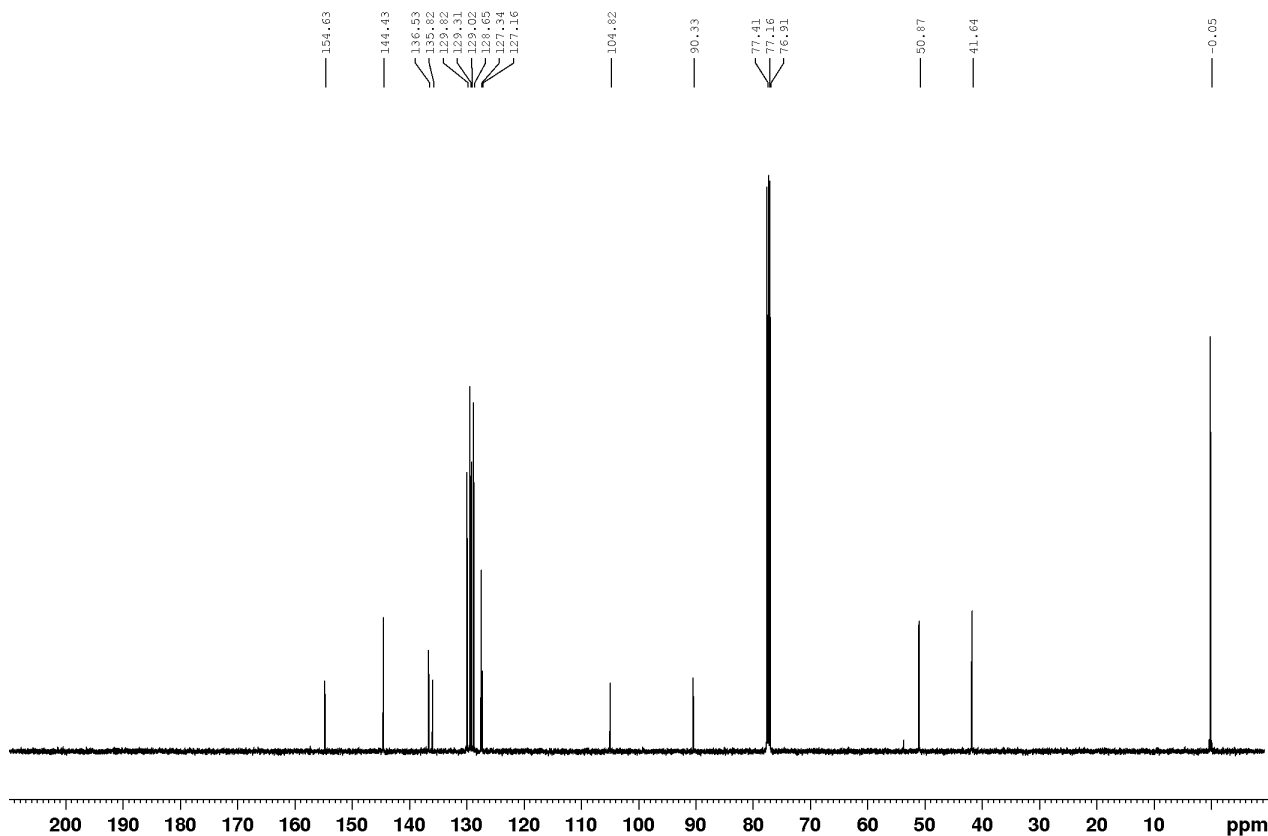

3-(4-Chlorophenyl)-6-(1-hydroxyethyl)-7-(trimethylsilyl)isoxazolo[5,4-*e*][1,2]azaborinin-5(4*H*)-ol (3a)

<sup>1</sup>H NMR (500 MHz, CDCl<sub>3</sub>)

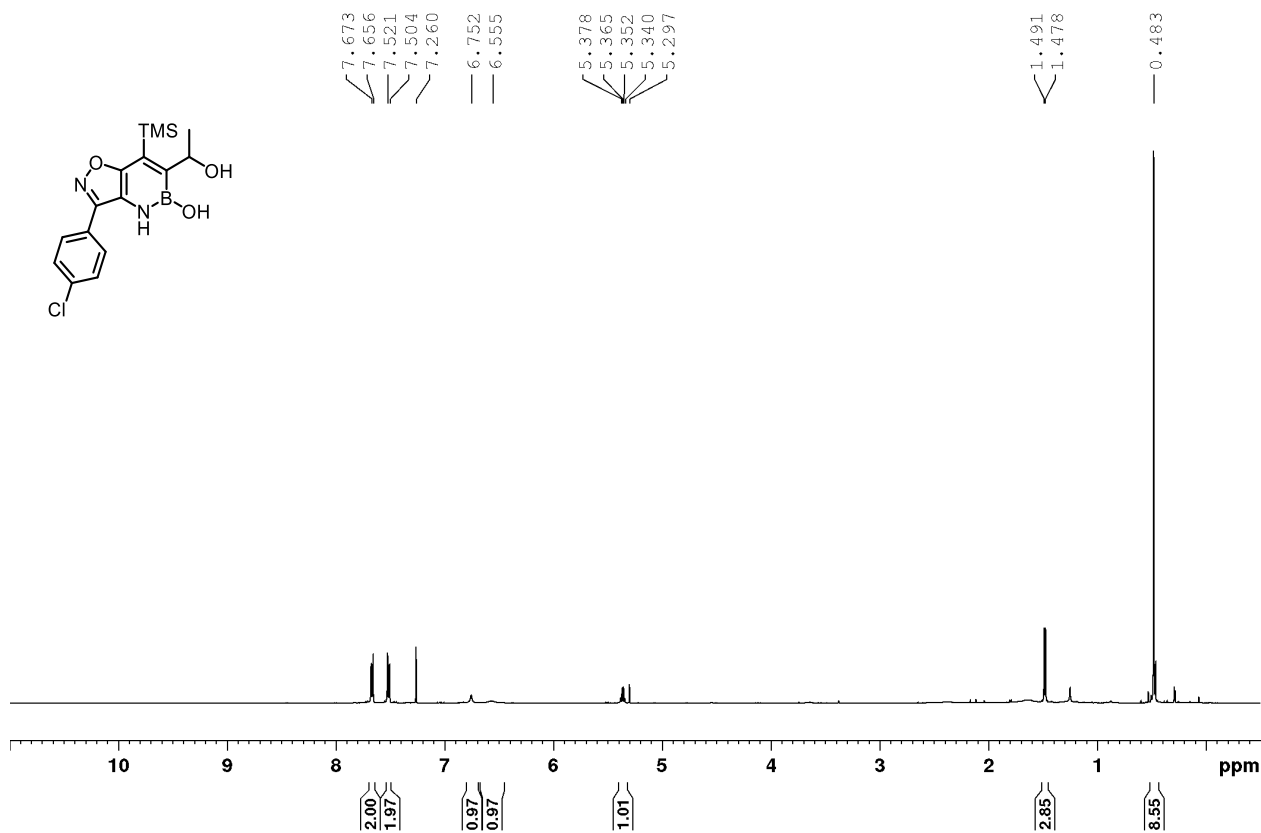

<sup>13</sup>C NMR (125 MHz, CDCl<sub>3</sub>)

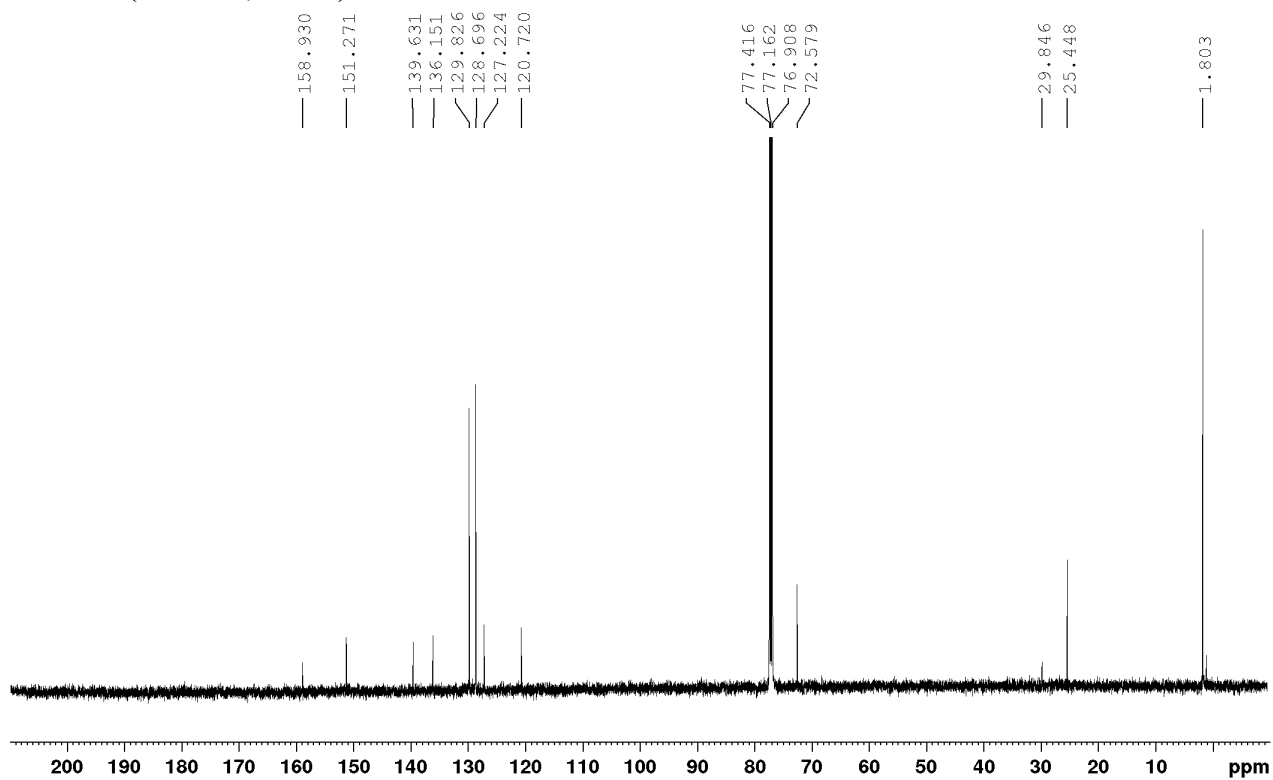

$^{11}\text{B}$  NMR (160 MHz,  $\text{CDCl}_3$ )

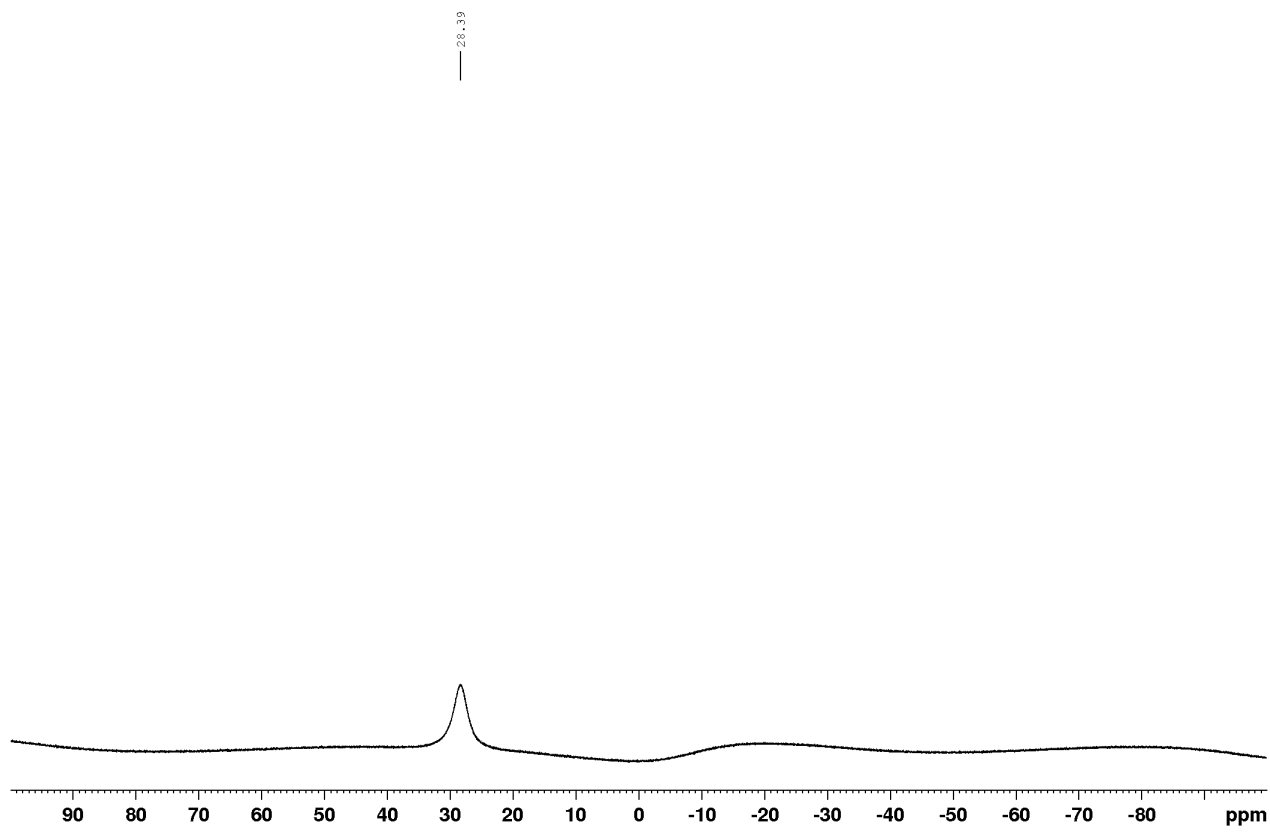

**3-(4-Chlorophenyl)-7-(trimethylsilyl)-6-vinylisoxazolo[5,4-e][1,2]azaborinin-5(4H)-ol (3b)**

**<sup>1</sup>H NMR (500 MHz, CDCl<sub>3</sub>)**

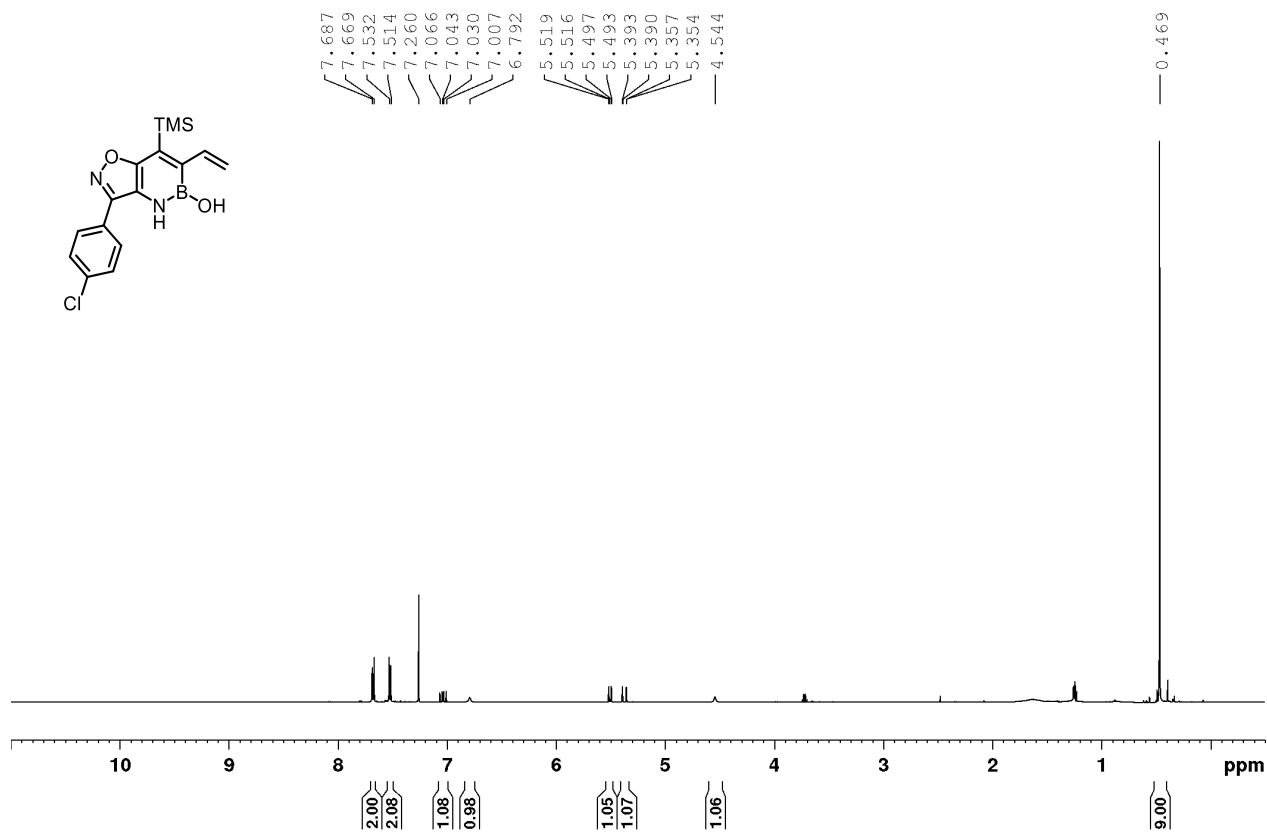

**<sup>13</sup>C NMR (125 MHz, CDCl<sub>3</sub>)**

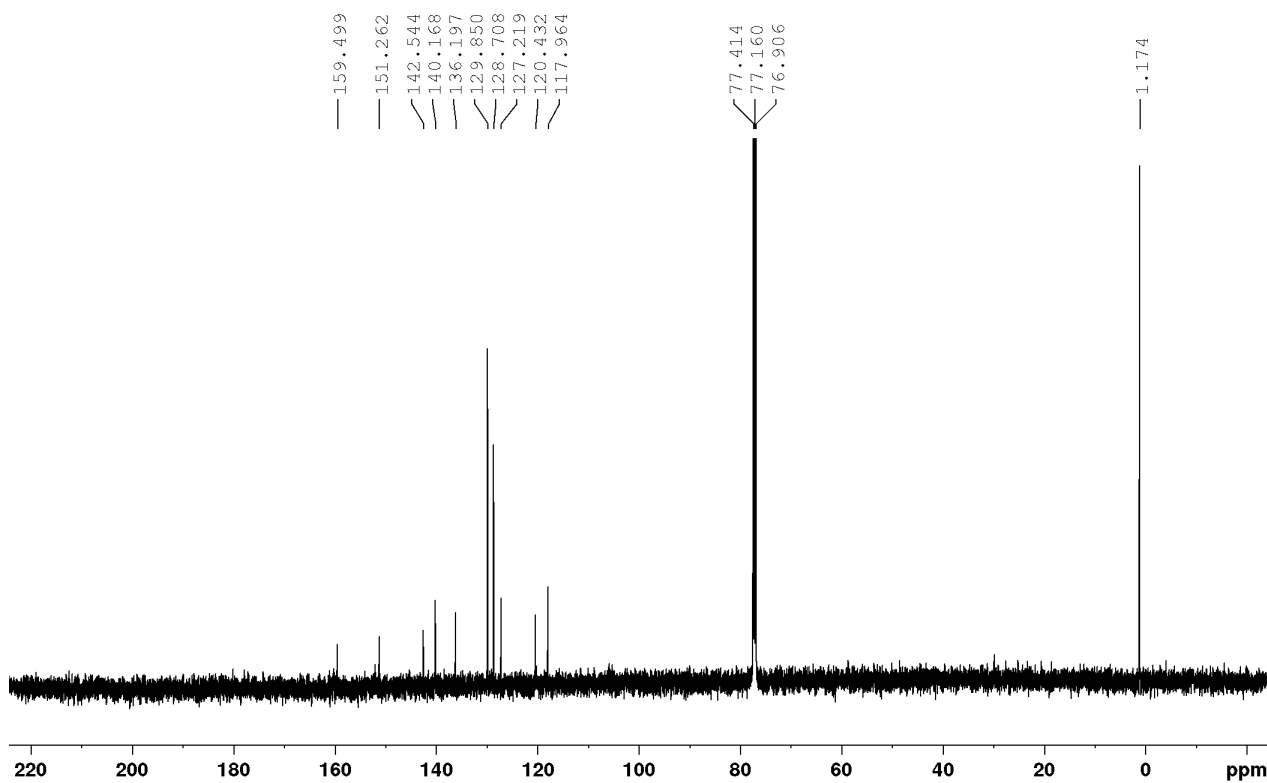

$^{11}\text{B}$  NMR (160 MHz,  $\text{CDCl}_3$ )

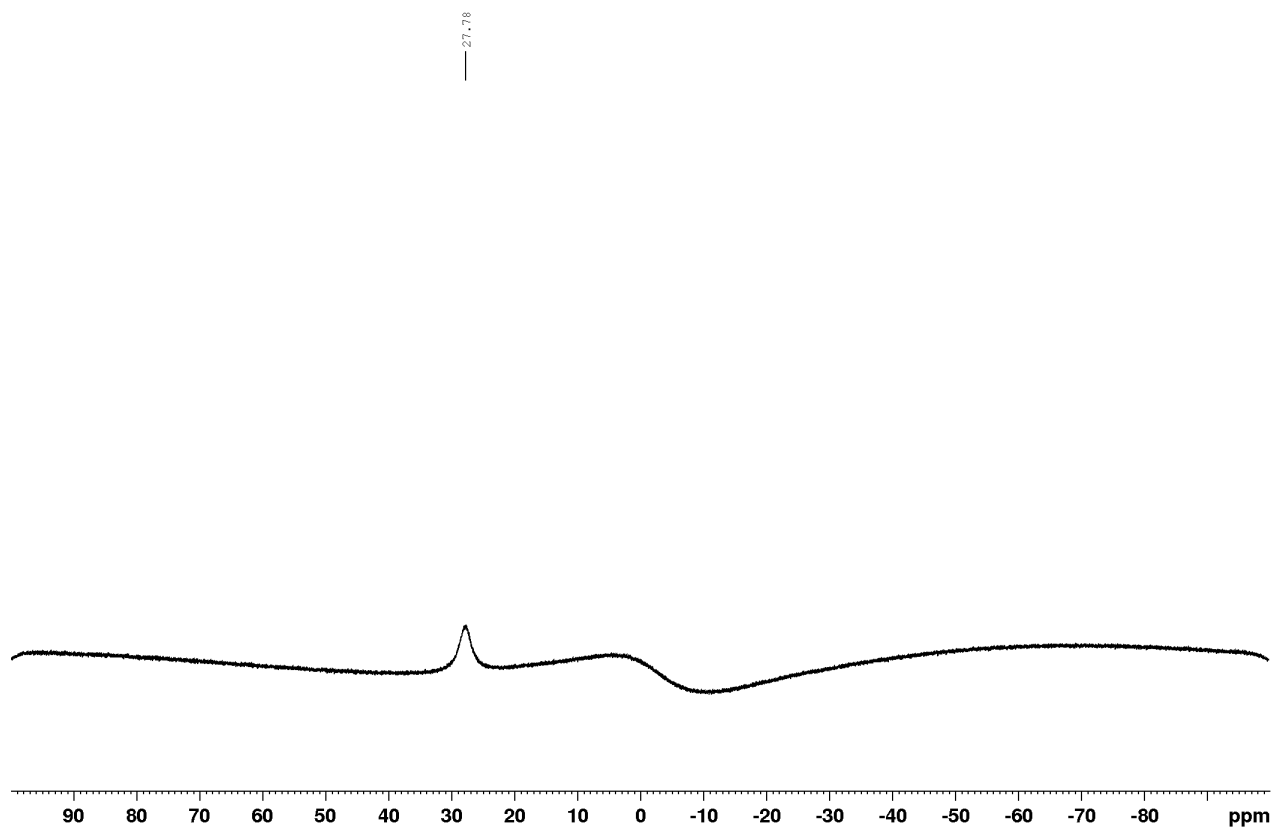

**3-(4-Chlorophenyl)-6-(1-methoxyethyl)-7-(trimethylsilyl)isoxazolo[5,4-*e*][1,2]azaborinin-5(4*H*)-ol (5a)**

**<sup>1</sup>H NMR (500 MHz, CDCl<sub>3</sub>)**

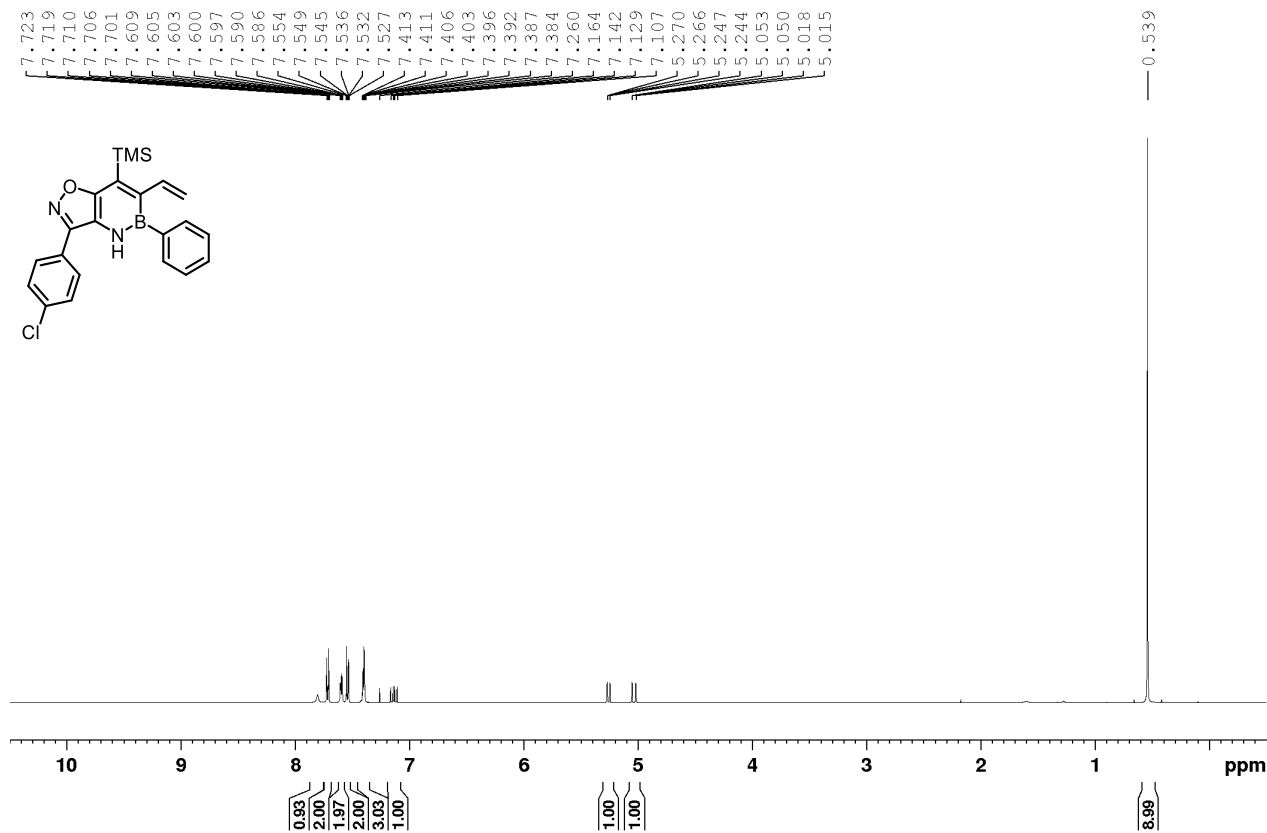

**<sup>13</sup>C NMR (125 MHz, CDCl<sub>3</sub>)**

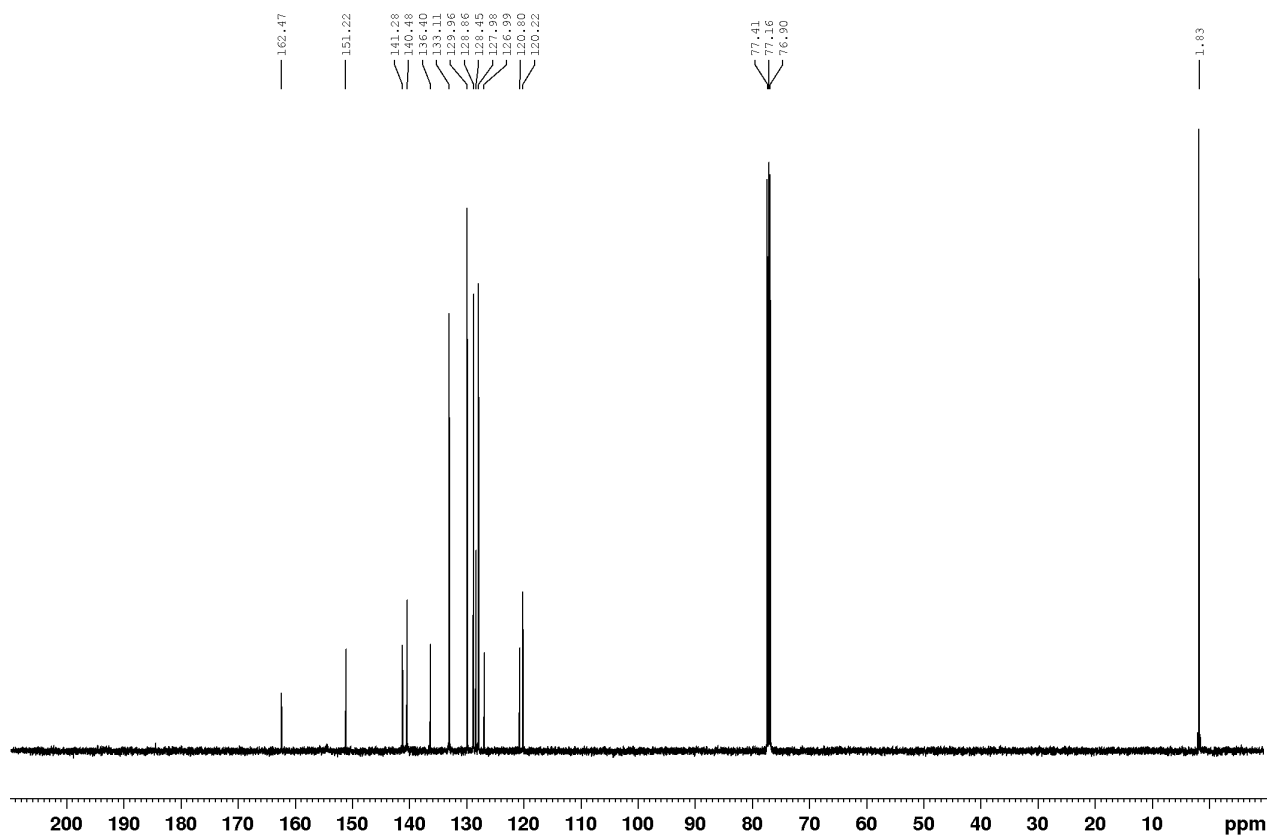



$^{11}\text{B}$  NMR (128 MHz,  $\text{CDCl}_3$ )

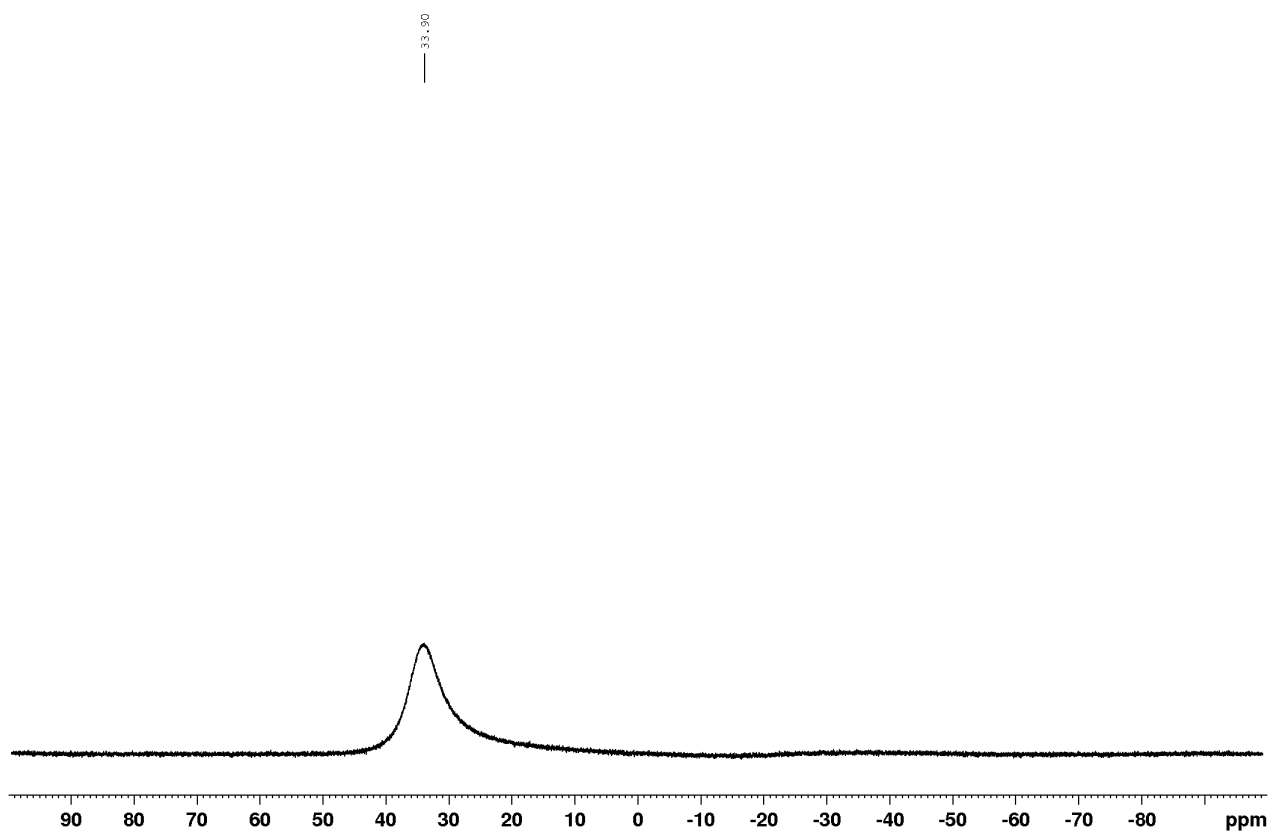

3-(4-Chlorophenyl)-5-(*p*-tolyl)-7-(trimethylsilyl)-6-vinyl-4,5-dihydroisoxazolo[5,4-*e*][1,2]azaborinine (5b)

<sup>1</sup>H NMR (500 MHz, CDCl<sub>3</sub>)

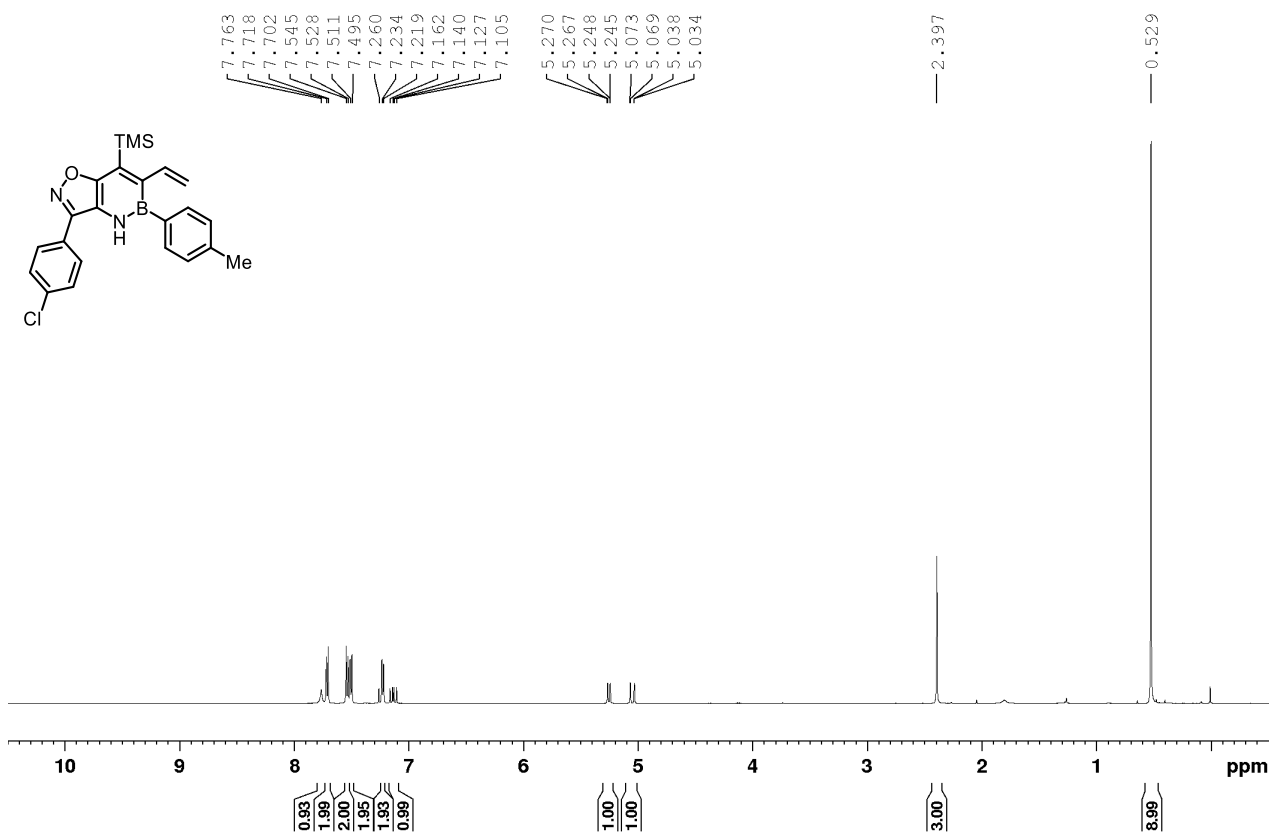

<sup>13</sup>C NMR (125 MHz, CDCl<sub>3</sub>)

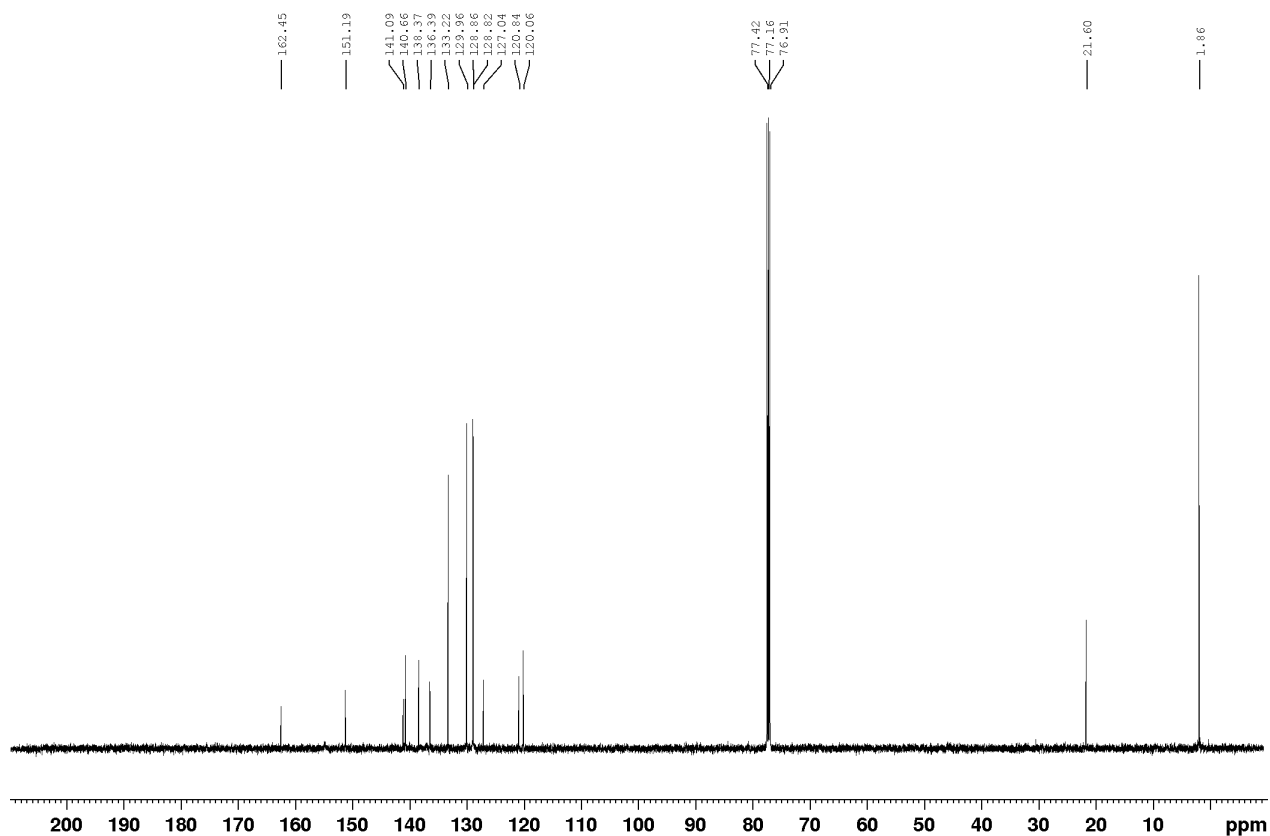

$^{11}\text{B}$  NMR (160 MHz,  $\text{CDCl}_3$ )

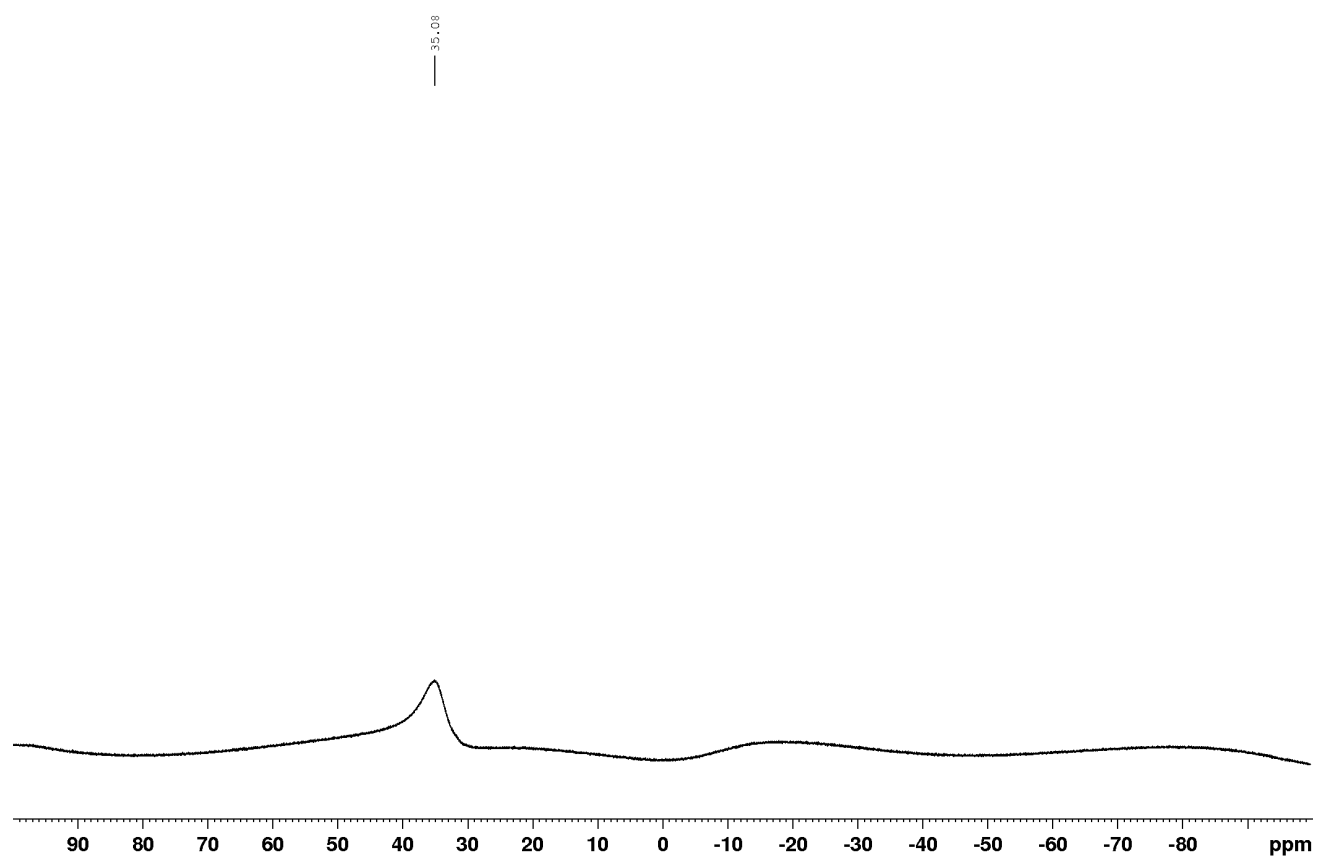

**3-(4-Chlorophenyl)-5-(4-methoxyphenyl)-7-(trimethylsilyl)-6-vinyl-4,5-dihydroisoxazolo[5,4-*e*][1,2]azaborinine (5c)**

**<sup>1</sup>H NMR (500 MHz, CDCl<sub>3</sub>)**

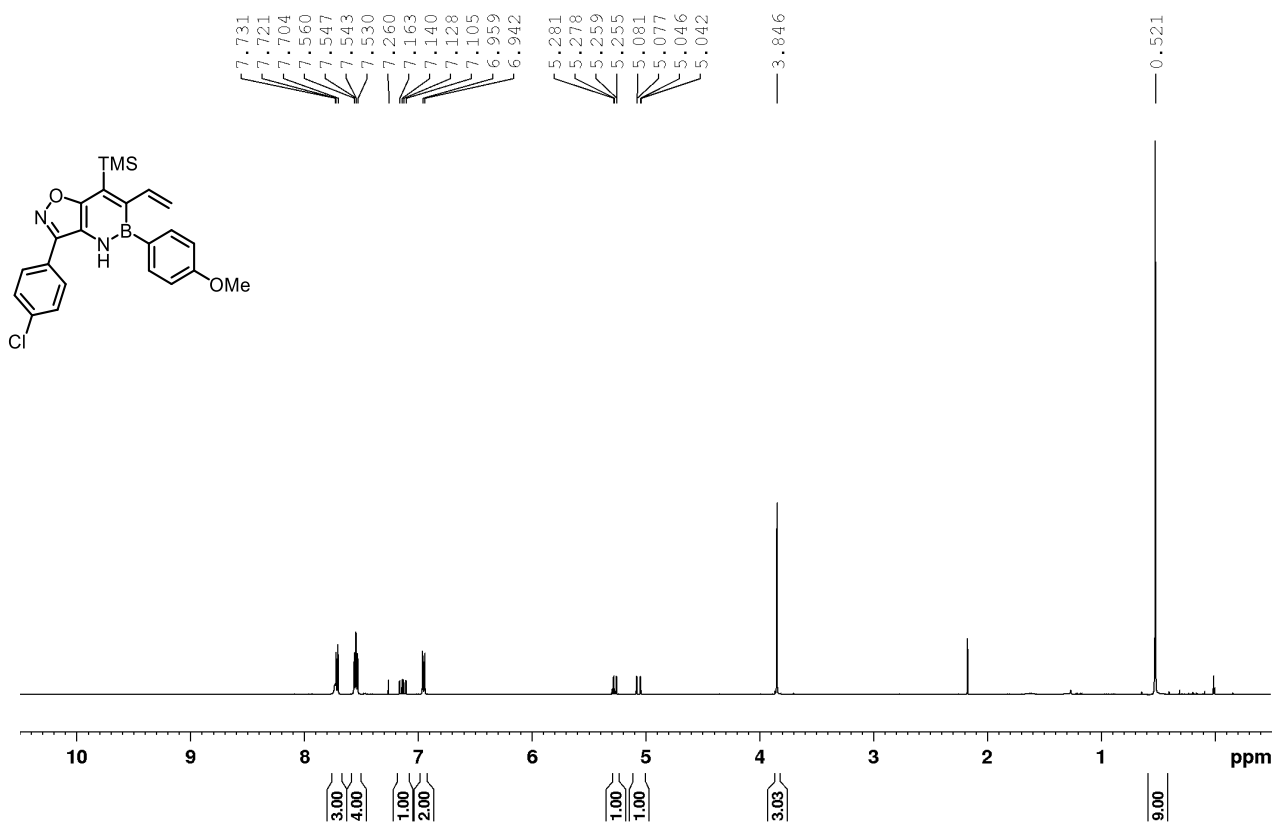

**<sup>13</sup>C NMR (125 MHz, CDCl<sub>3</sub>)**

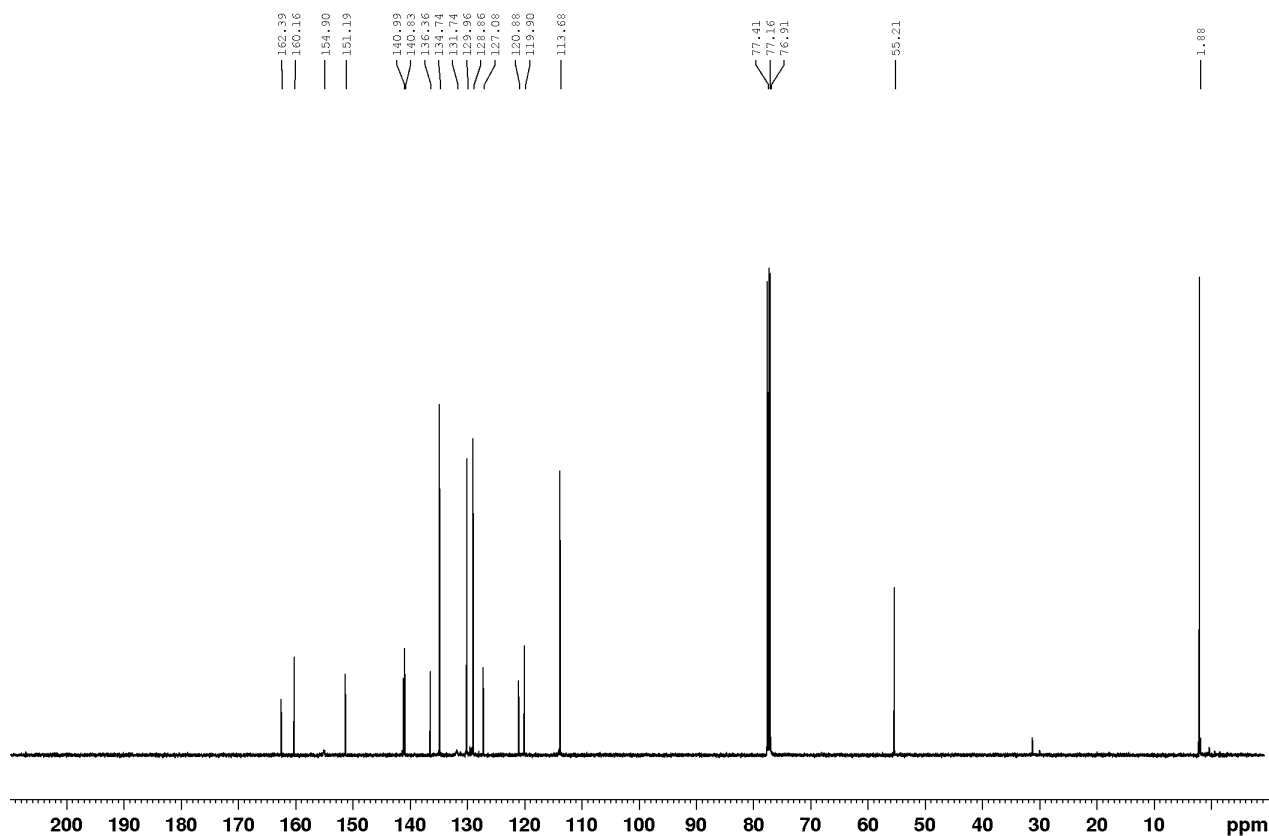

$^{11}\text{B}$  NMR (160 MHz,  $\text{CDCl}_3$ )

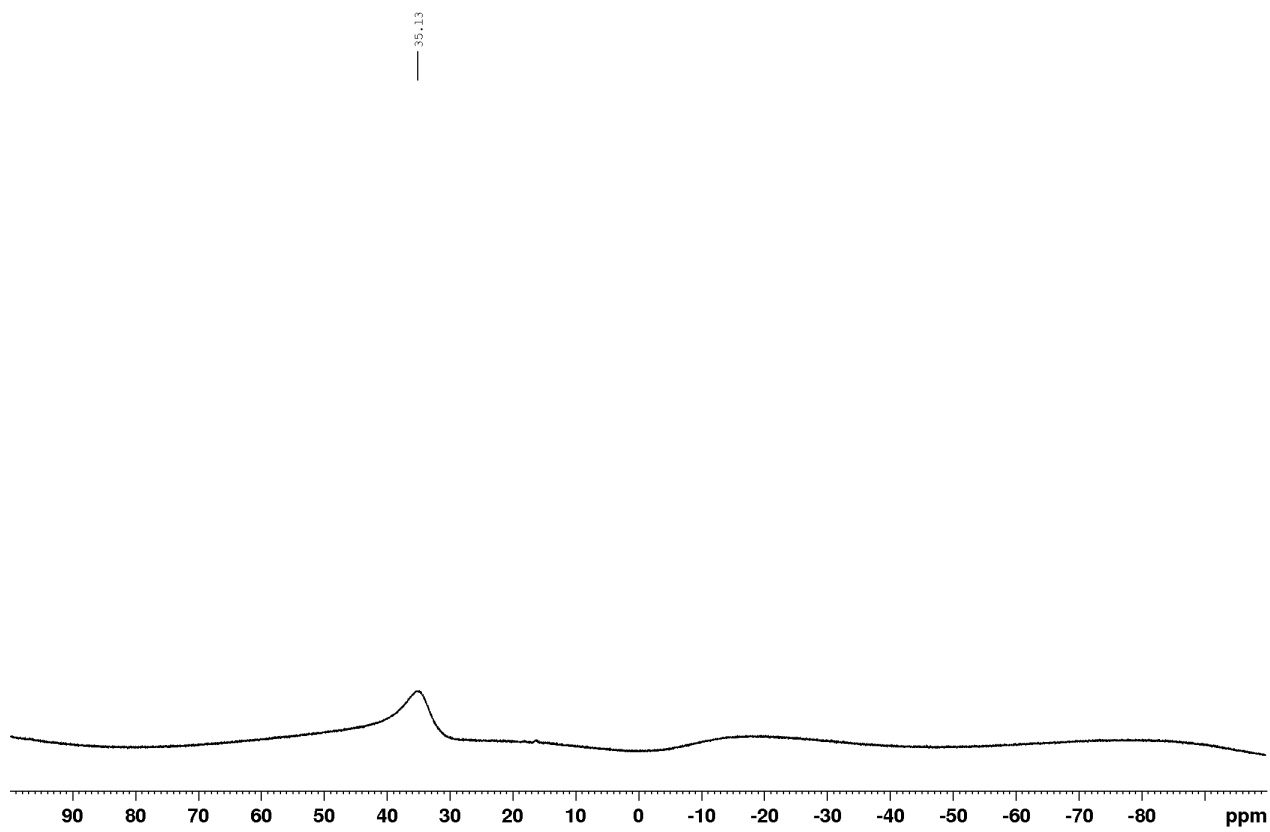

**5-(4-(*tert*-Butyl)phenyl)-3-(4-chlorophenyl)-7-(trimethylsilyl)-6-vinyl-4,5-dihydroisoxazolo[5,4-*e*][1,2]azaborinine (5d)**  
<sup>1</sup>H NMR (400 MHz, CDCl<sub>3</sub>)

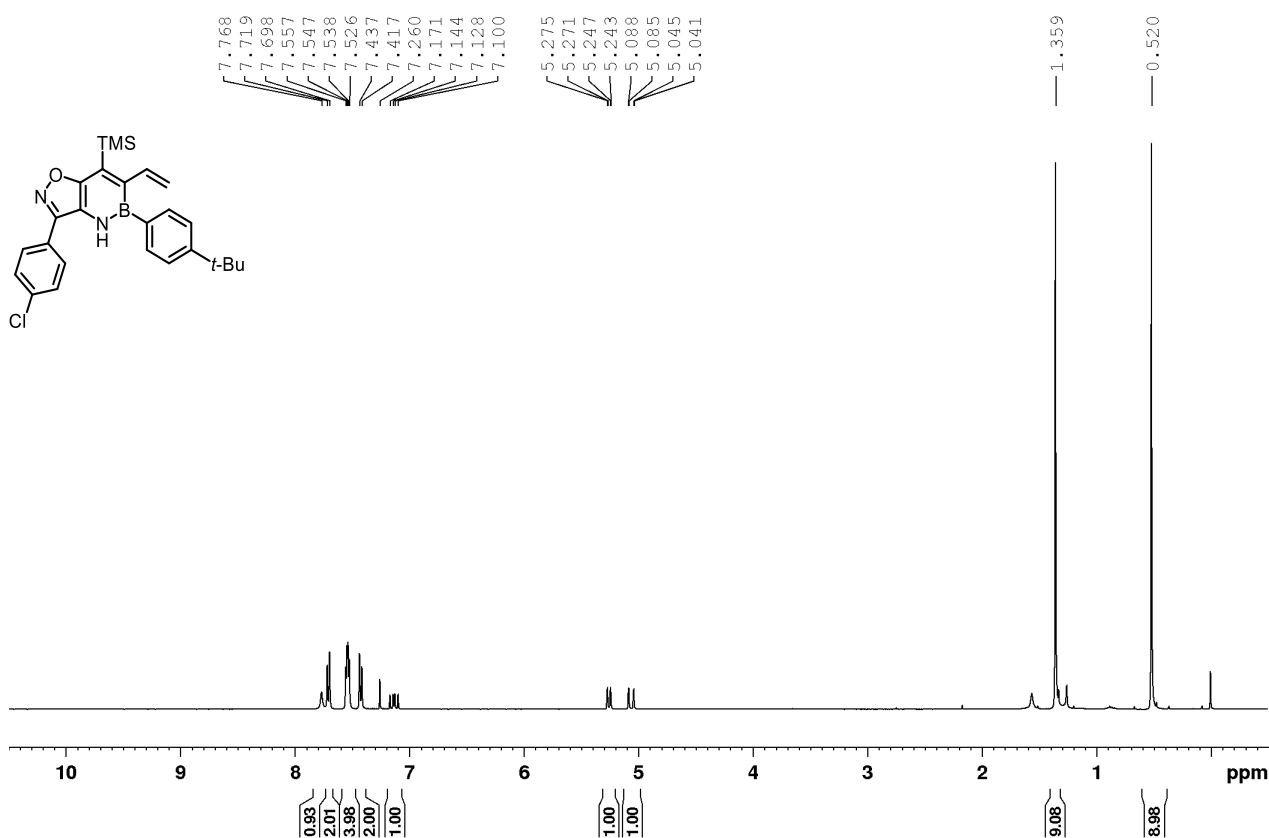

<sup>13</sup>C NMR (125 MHz, CDCl<sub>3</sub>)

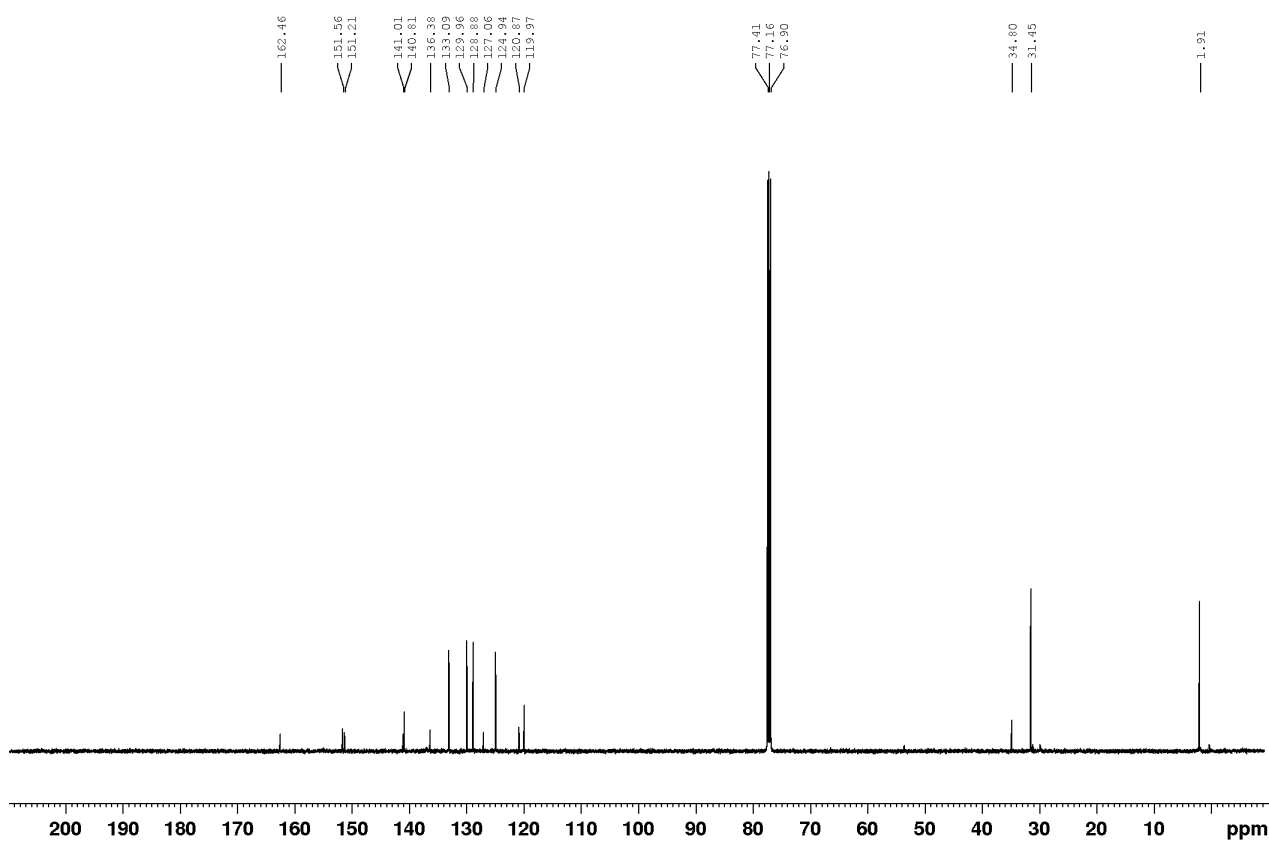

$^{11}\text{B}$  NMR (160 MHz,  $\text{CDCl}_3$ )

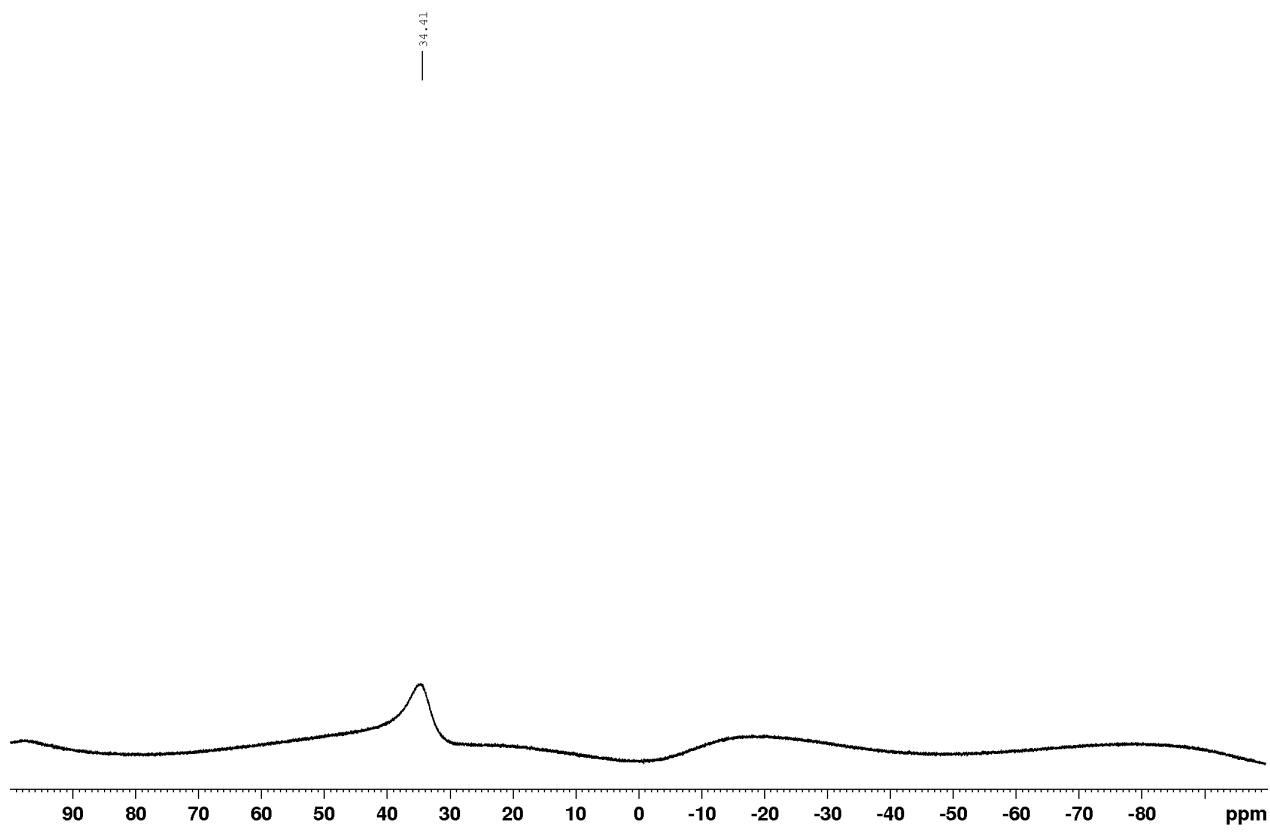

**3,5-Bis(4-chlorophenyl)-7-(trimethylsilyl)-6-vinyl-4,5-dihydroisoxazolo[5,4-*e*][1,2]azaborinine (5e)**

**<sup>1</sup>H NMR (500 MHz, CDCl<sub>3</sub>)**

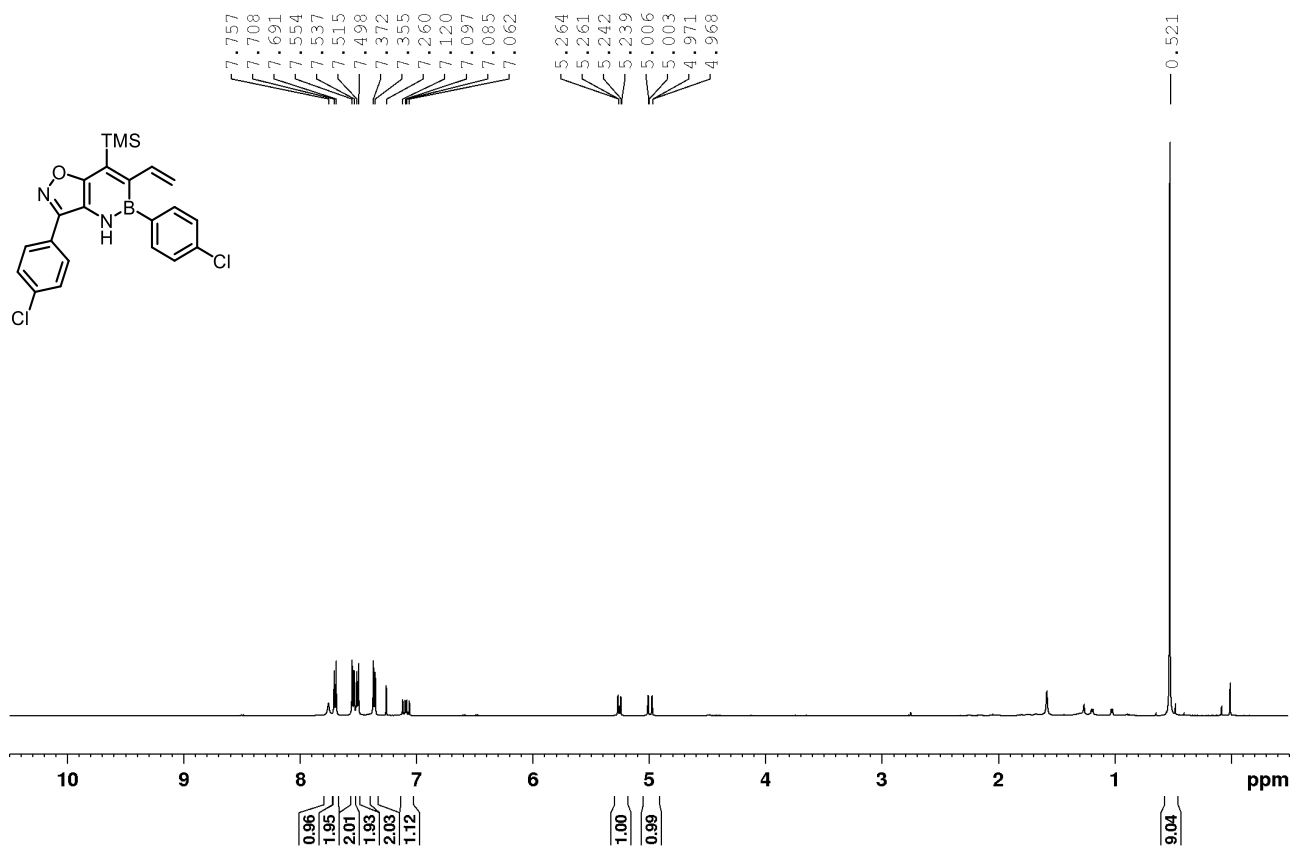

**<sup>13</sup>C NMR (125 MHz, CDCl<sub>3</sub>)**

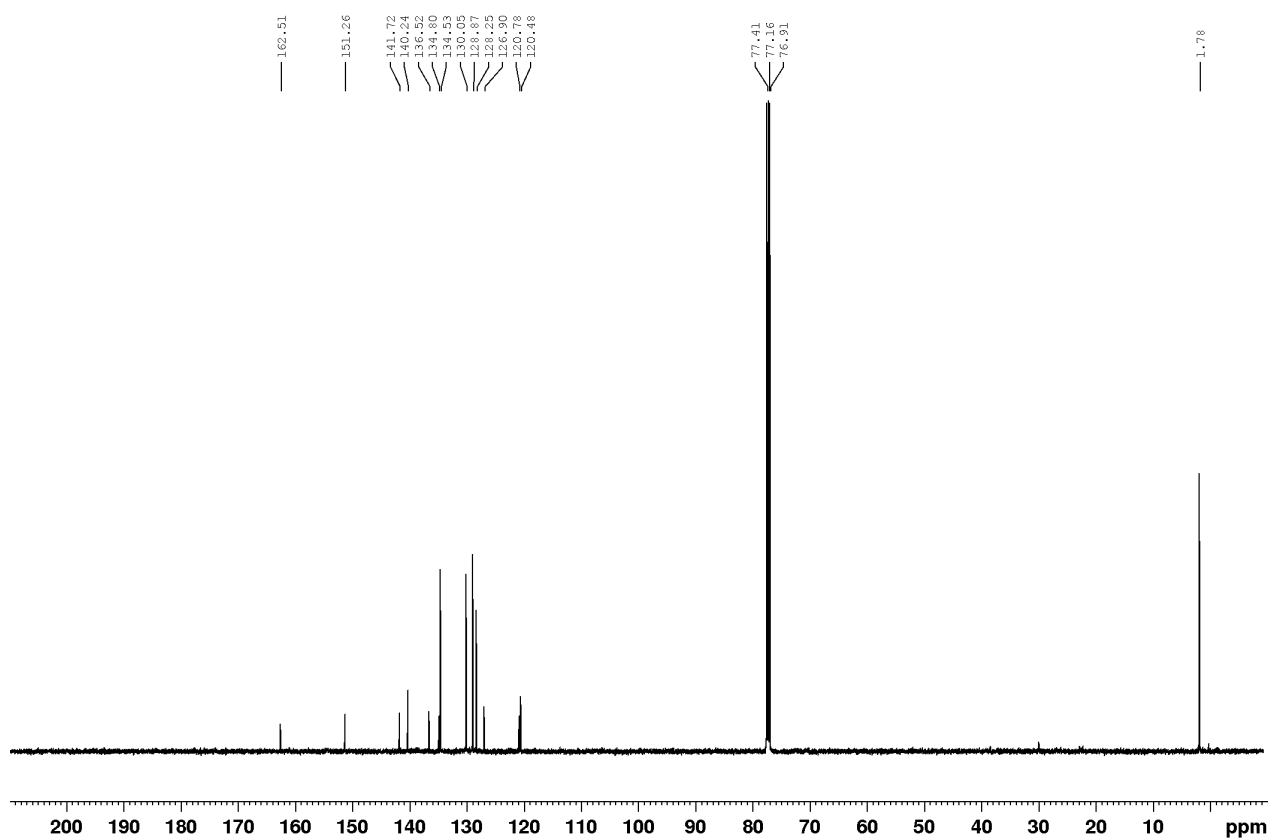



$^{11}\text{B}$  NMR (160 MHz,  $\text{CDCl}_3$ )

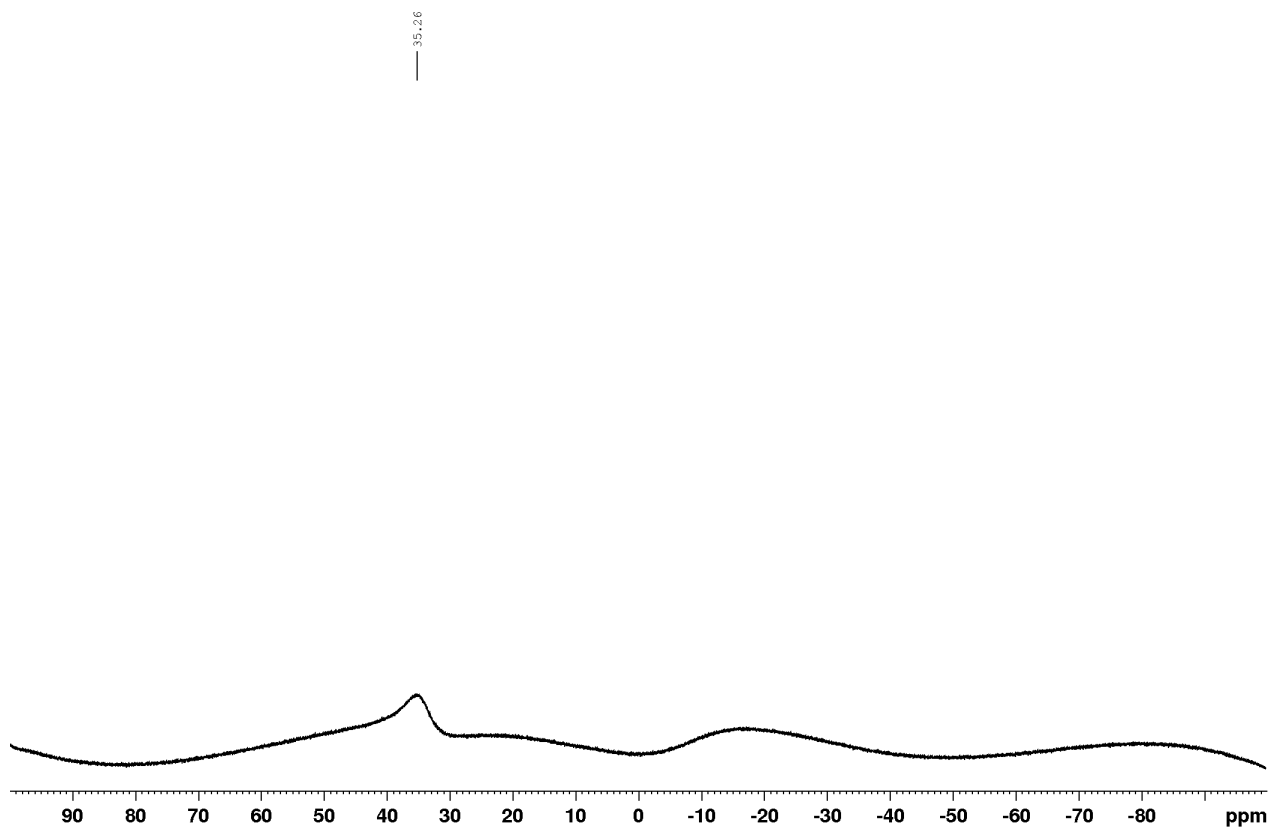

4-(3-(4-Chlorophenyl)-7-(trimethylsilyl)-6-vinylisoxazolo[5,4-e][1,2]azaborinin-5(4H)-yl)benzotrile (5f)

$^1\text{H}$  NMR (500 MHz,  $\text{CDCl}_3$ )

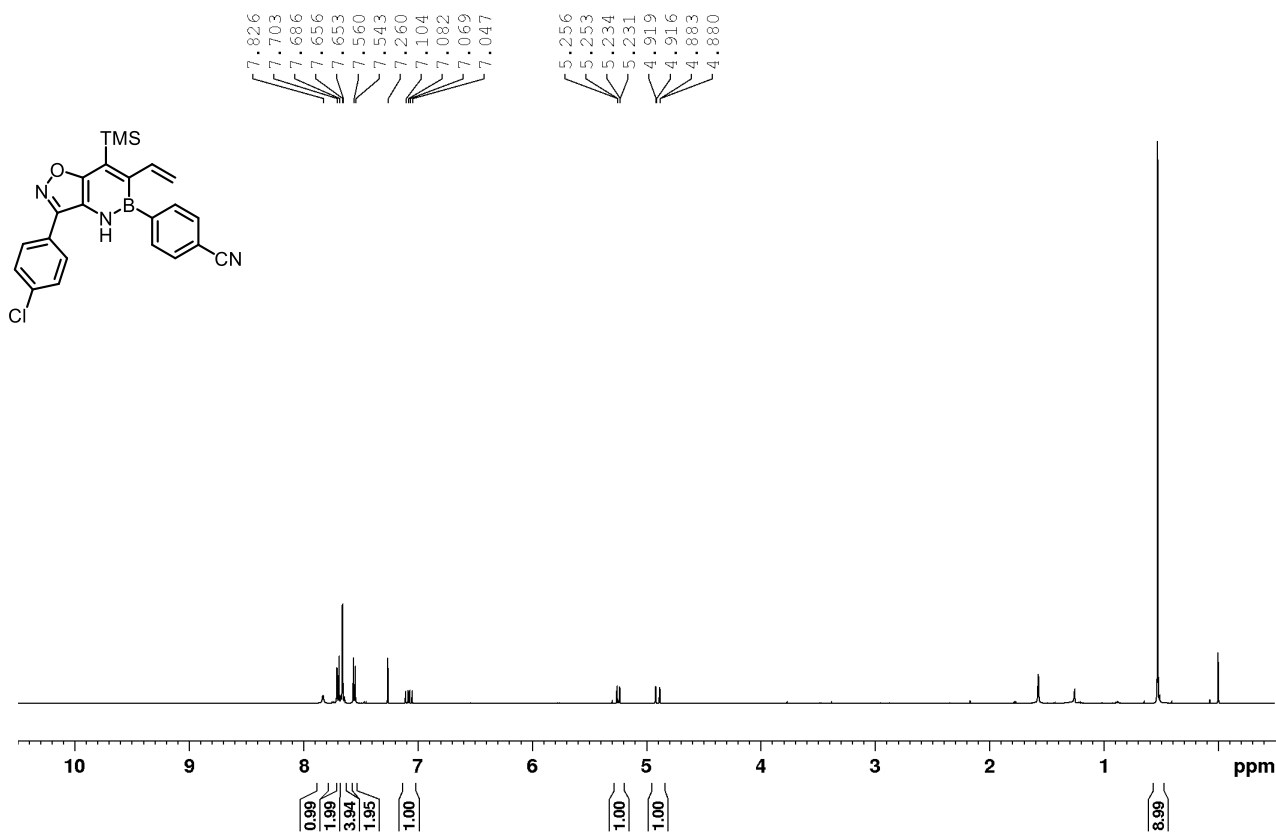

$^{13}\text{C}$  NMR (125 MHz,  $\text{CDCl}_3$ )

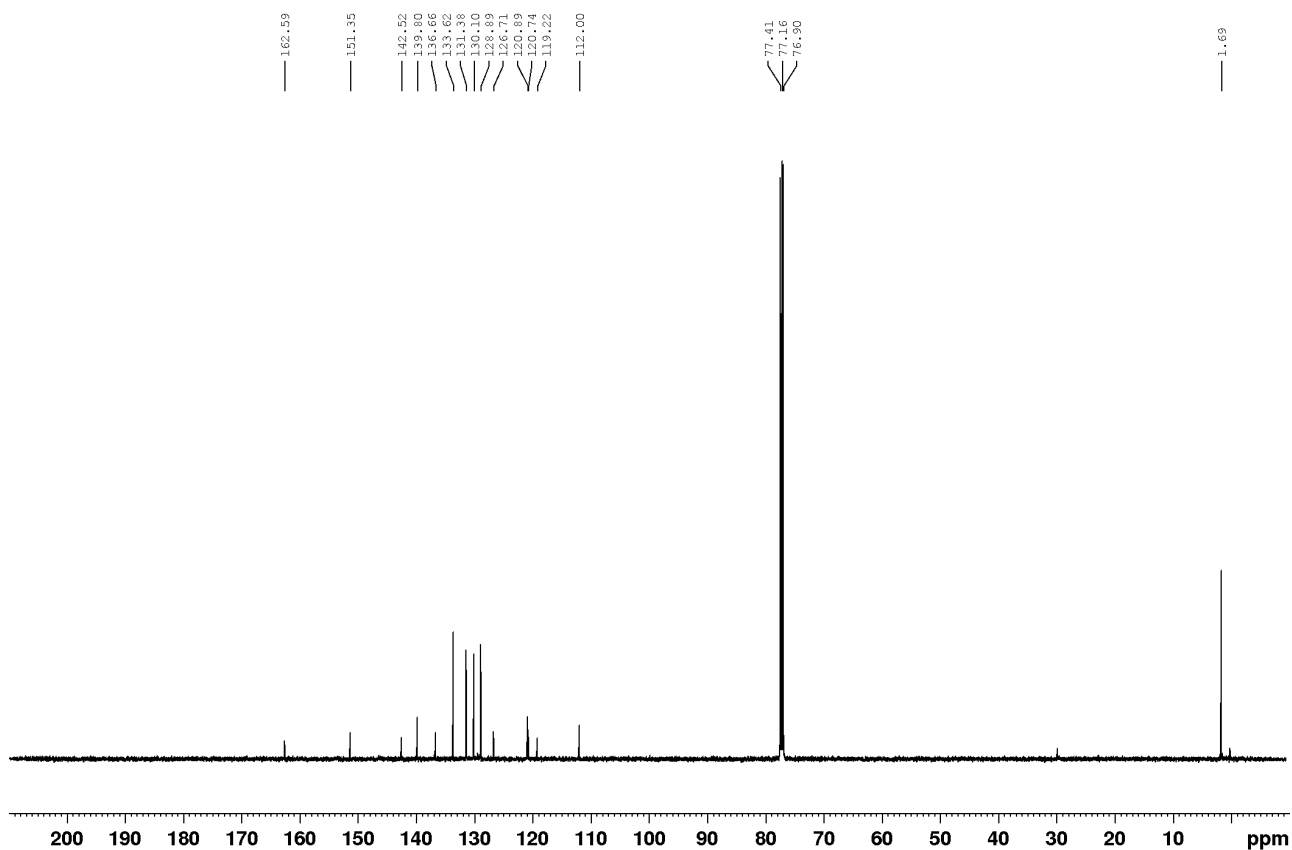

$^{11}\text{B}$  NMR (160 MHz,  $\text{CDCl}_3$ )

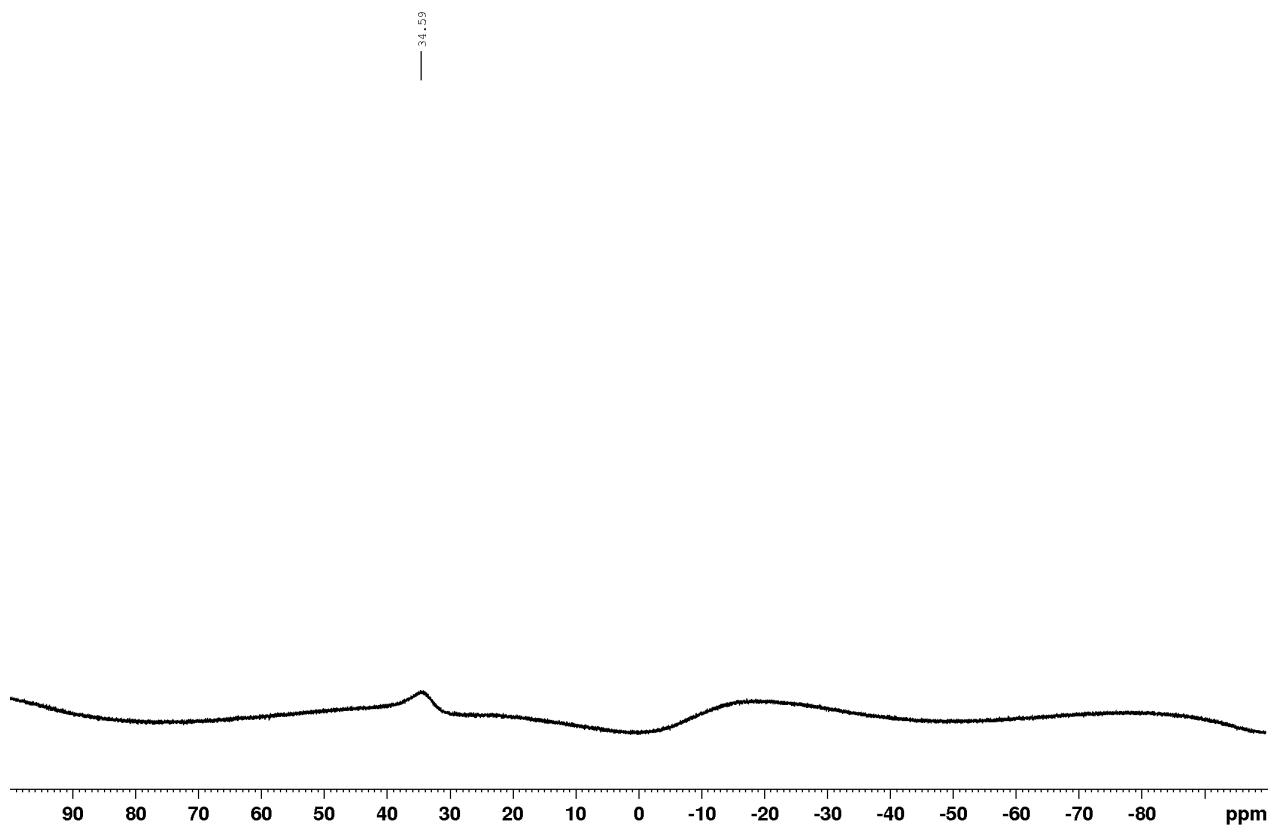

**5-(2-Bromophenyl)-3-(4-chlorophenyl)-7-(trimethylsilyl)-6-vinyl-4,5-dihydroisoxazolo[5,4-e][1,2]azaborinine (5g)**

**<sup>1</sup>H NMR (500 MHz, CDCl<sub>3</sub>)**

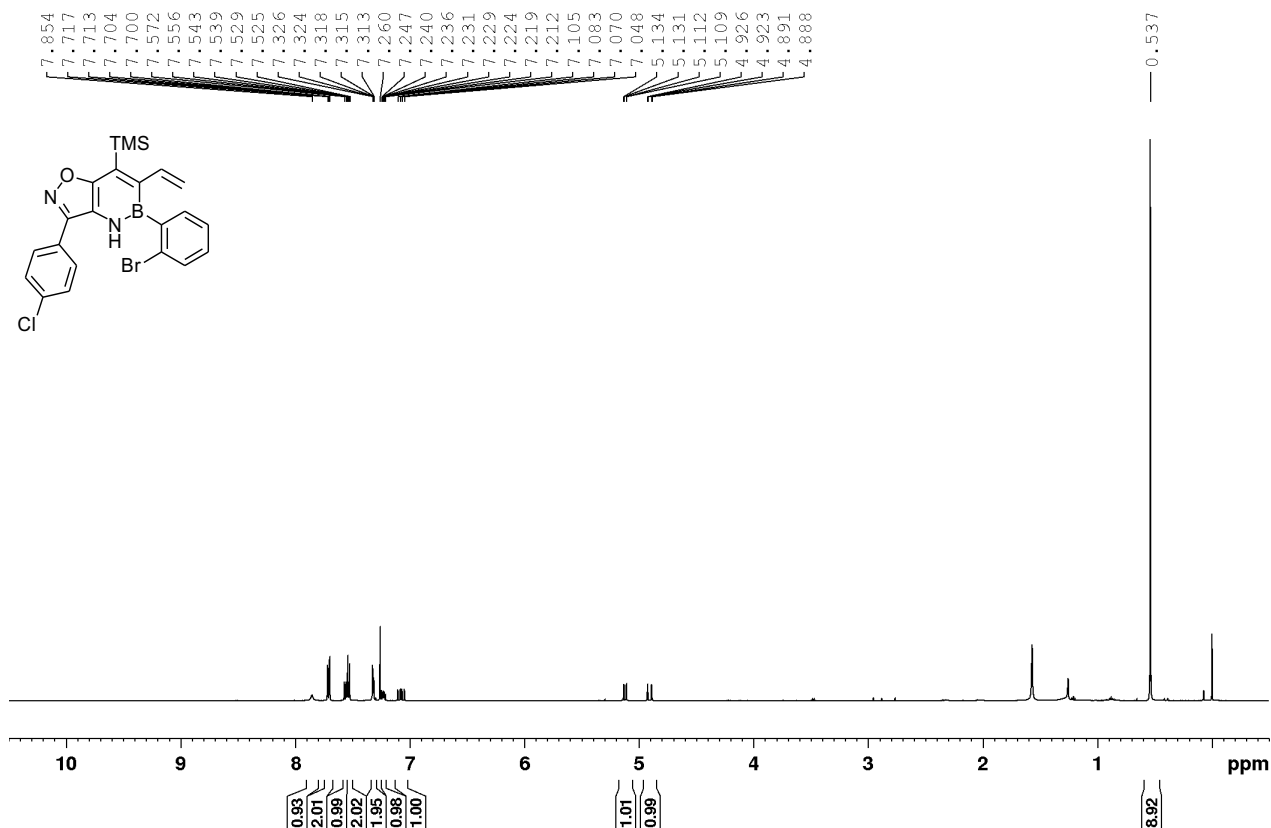

**<sup>13</sup>C NMR (125 MHz, CDCl<sub>3</sub>)**

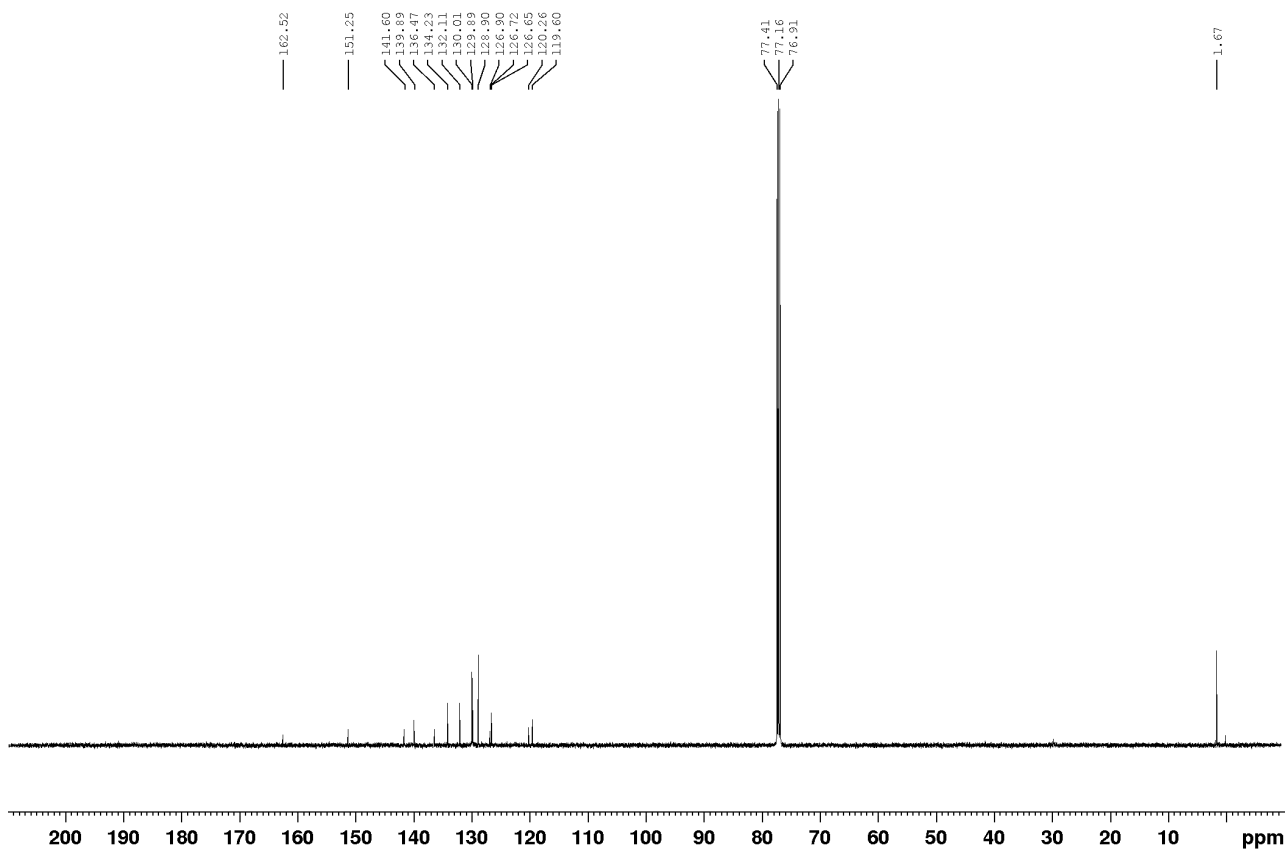

$^{11}\text{B}$  NMR (160 MHz,  $\text{CDCl}_3$ )

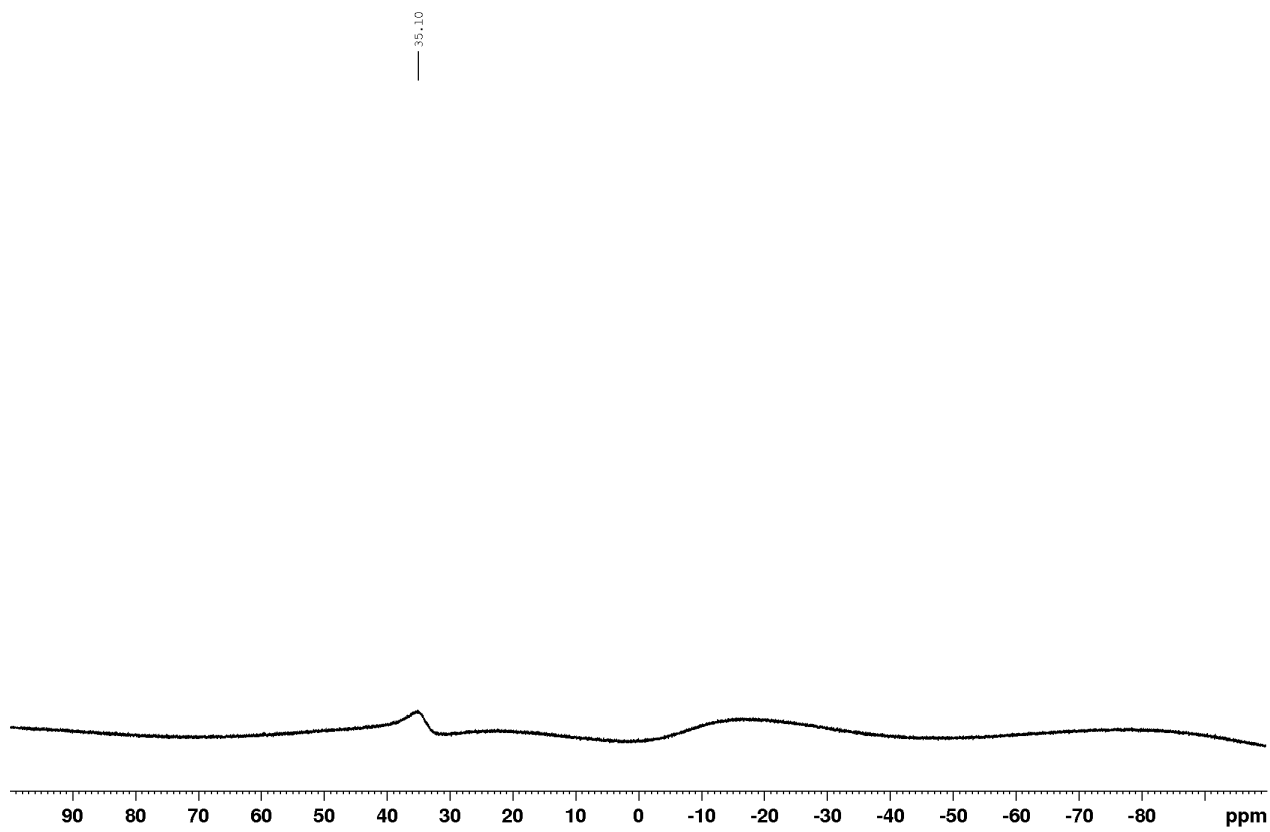

**3-(4-Chlorophenyl)-5-(naphthalen-2-yl)-7-(trimethylsilyl)-6-vinyl-4,5-dihydroisoxazolo[5,4-e][1,2]azaborinine (5h)**

**<sup>1</sup>H NMR (500 MHz, CDCl<sub>3</sub>)**

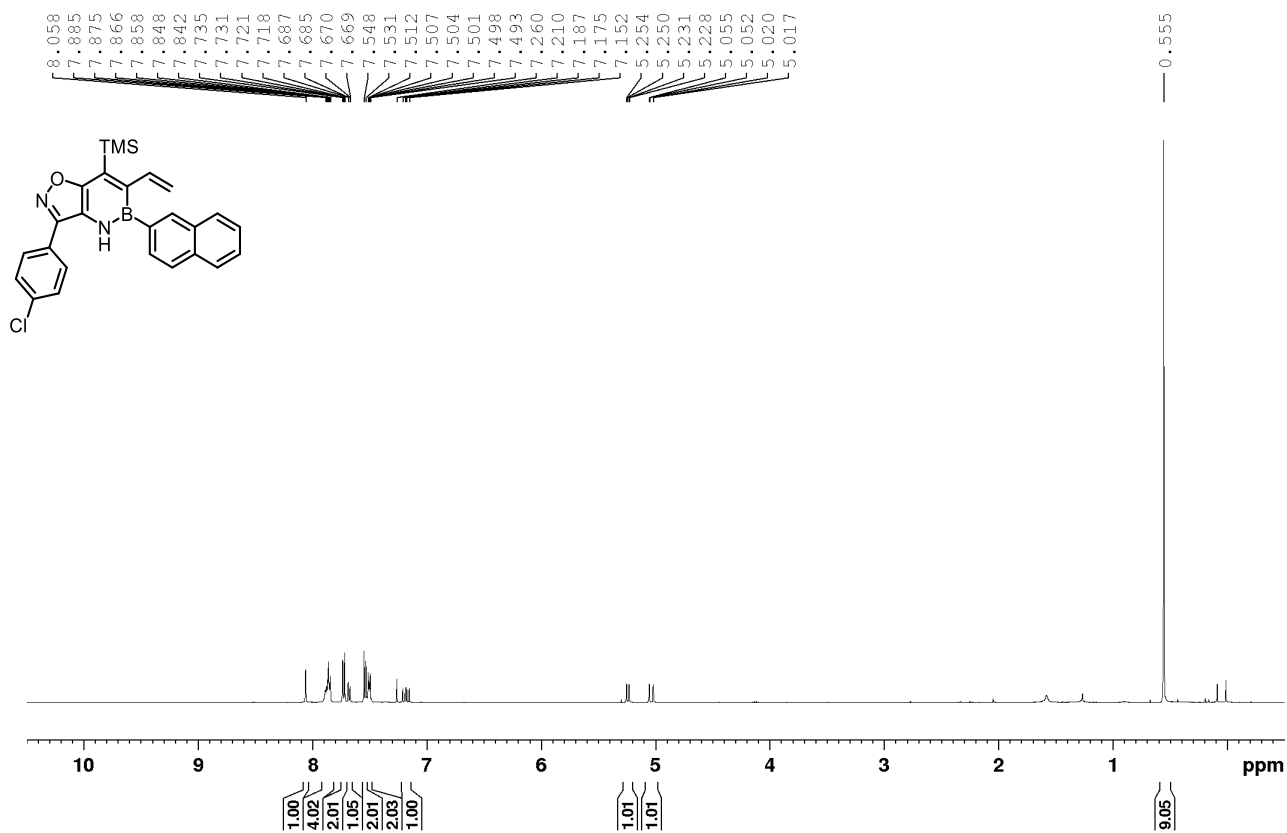

**<sup>13</sup>C NMR (125 MHz, CDCl<sub>3</sub>)**

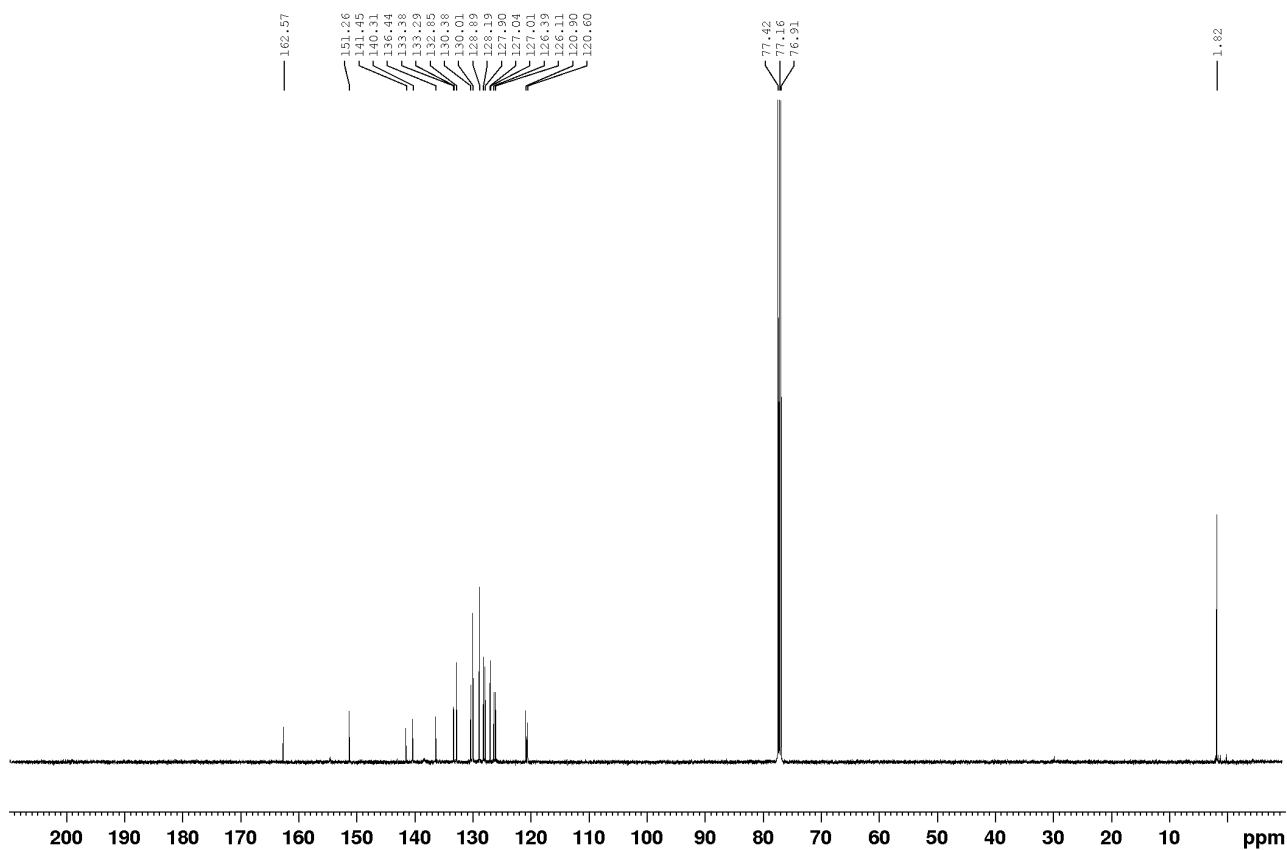

$^{11}\text{B}$  NMR (160 MHz,  $\text{CDCl}_3$ )

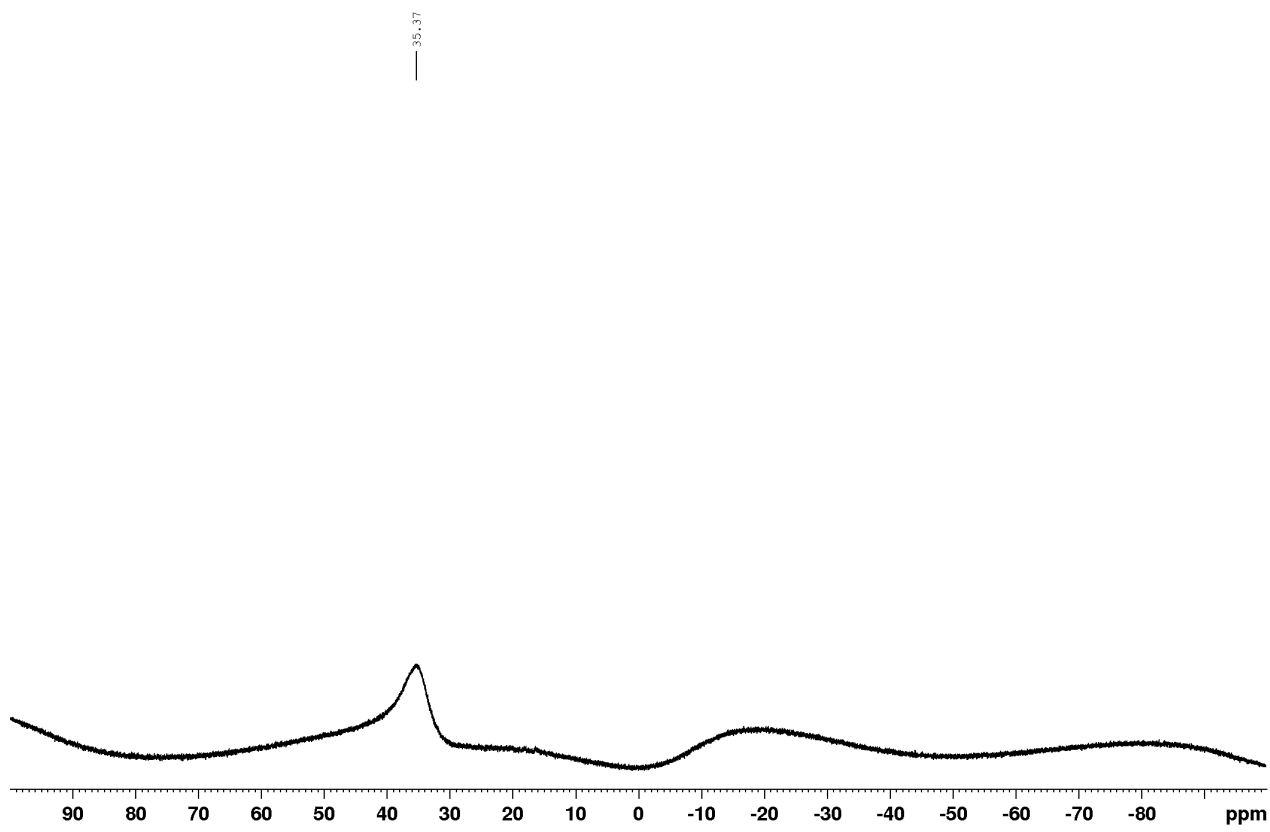

**3-(4-Chlorophenyl)-5-(thiophen-3-yl)-7-(trimethylsilyl)-6-vinyl-4,5-dihydroisoxazolo[5,4-*e*][1,2]azaborinine (5i)**

**<sup>1</sup>H NMR (500 MHz, CDCl<sub>3</sub>)**

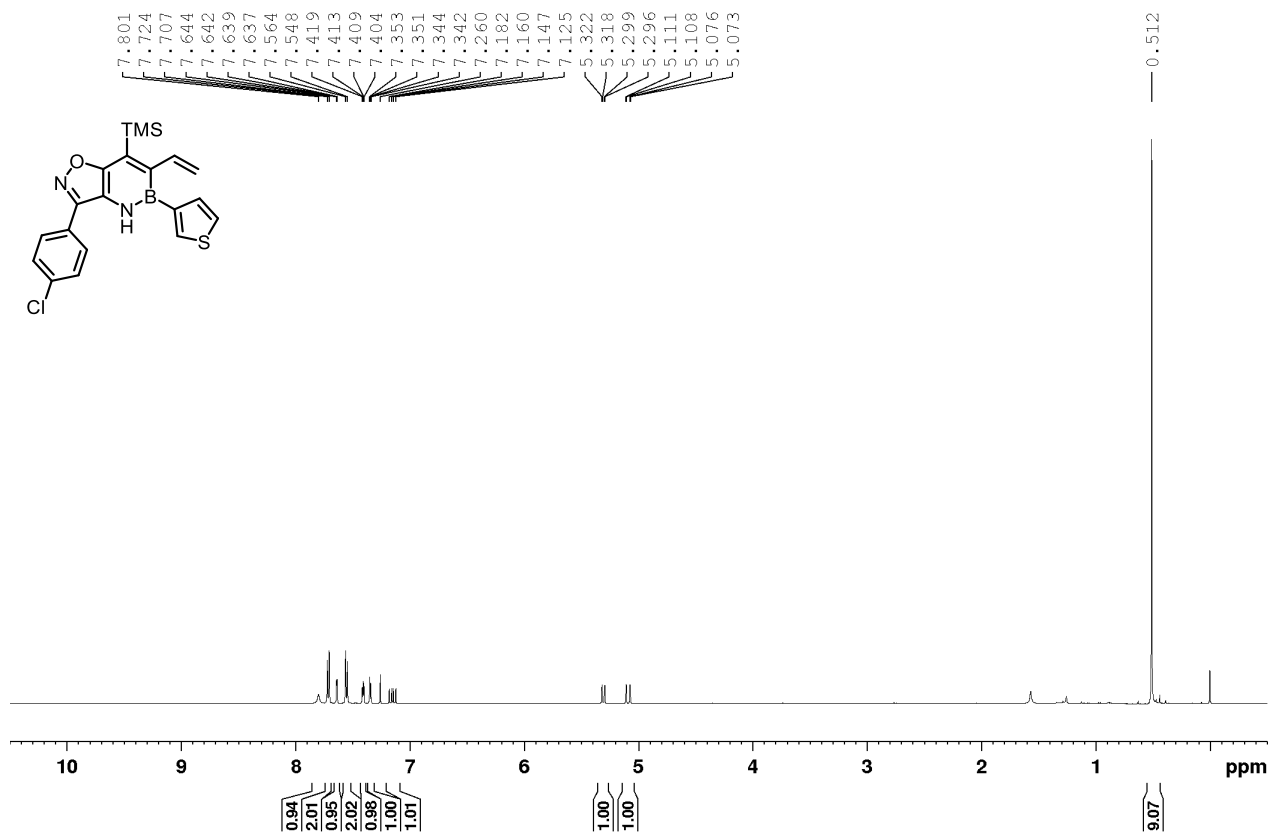

**<sup>13</sup>C NMR (125 MHz, CDCl<sub>3</sub>)**

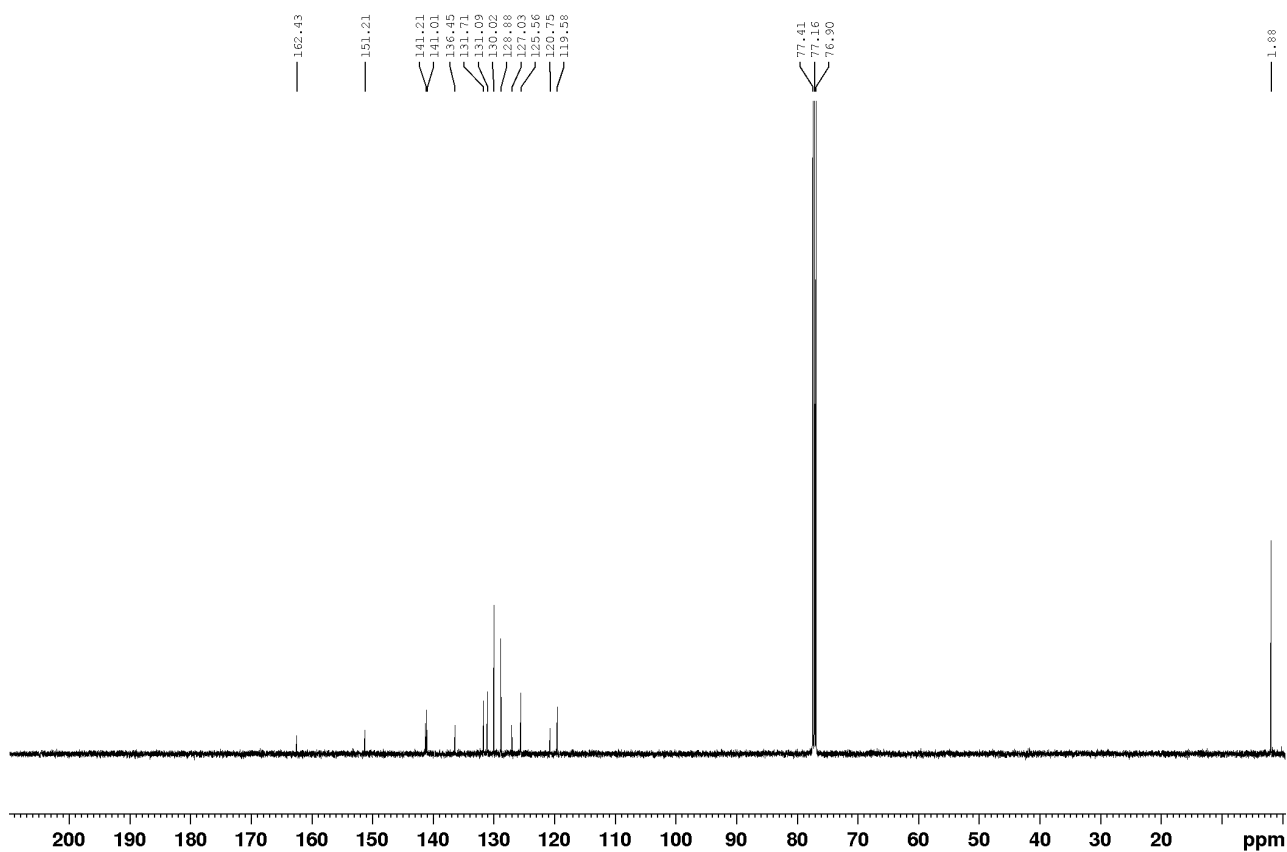



$^{11}\text{B}$  NMR (160 MHz,  $\text{CDCl}_3$ )

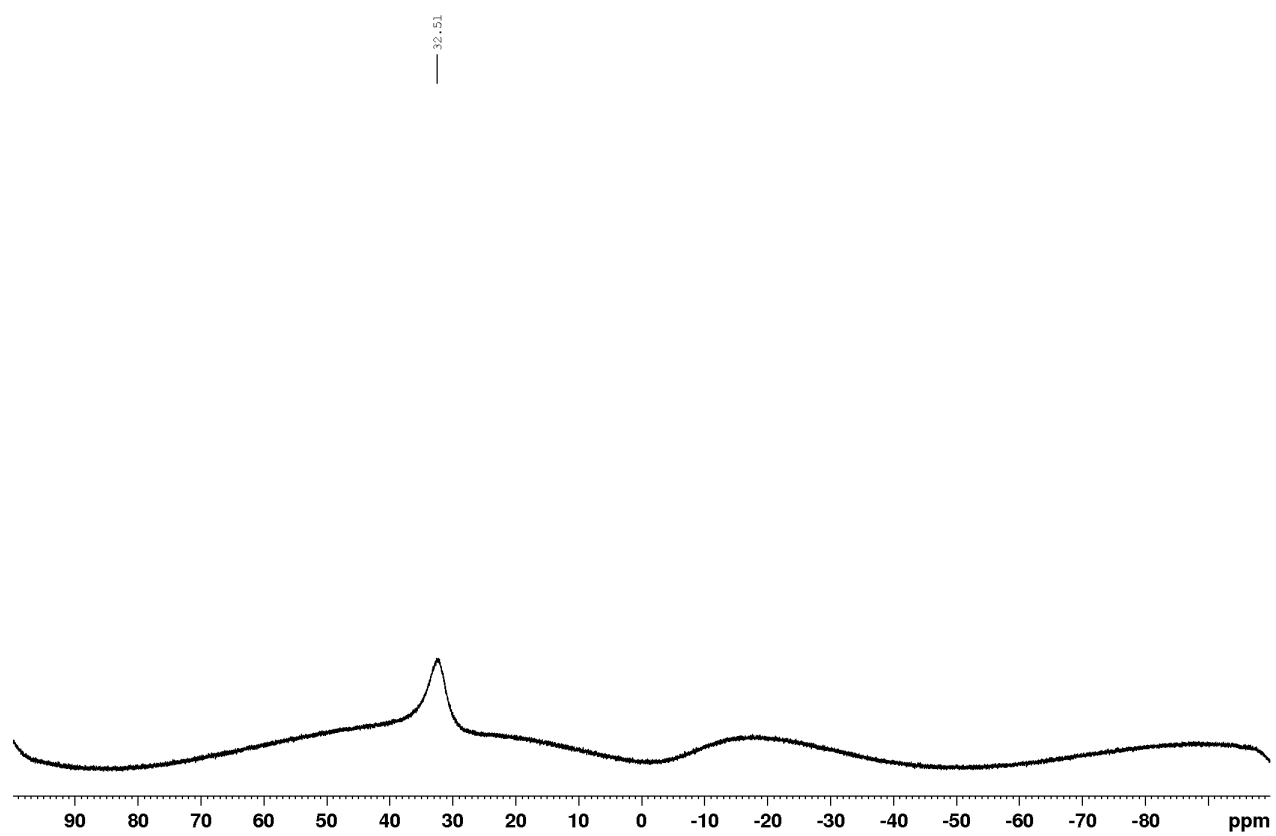

3-(4-Chlorophenyl)-5-methyl-7-(trimethylsilyl)-6-vinyl-4,5-dihydroisoxazolo[5,4-*e*][1,2]azaborinine (5j)

<sup>1</sup>H NMR (500 MHz, CDCl<sub>3</sub>)

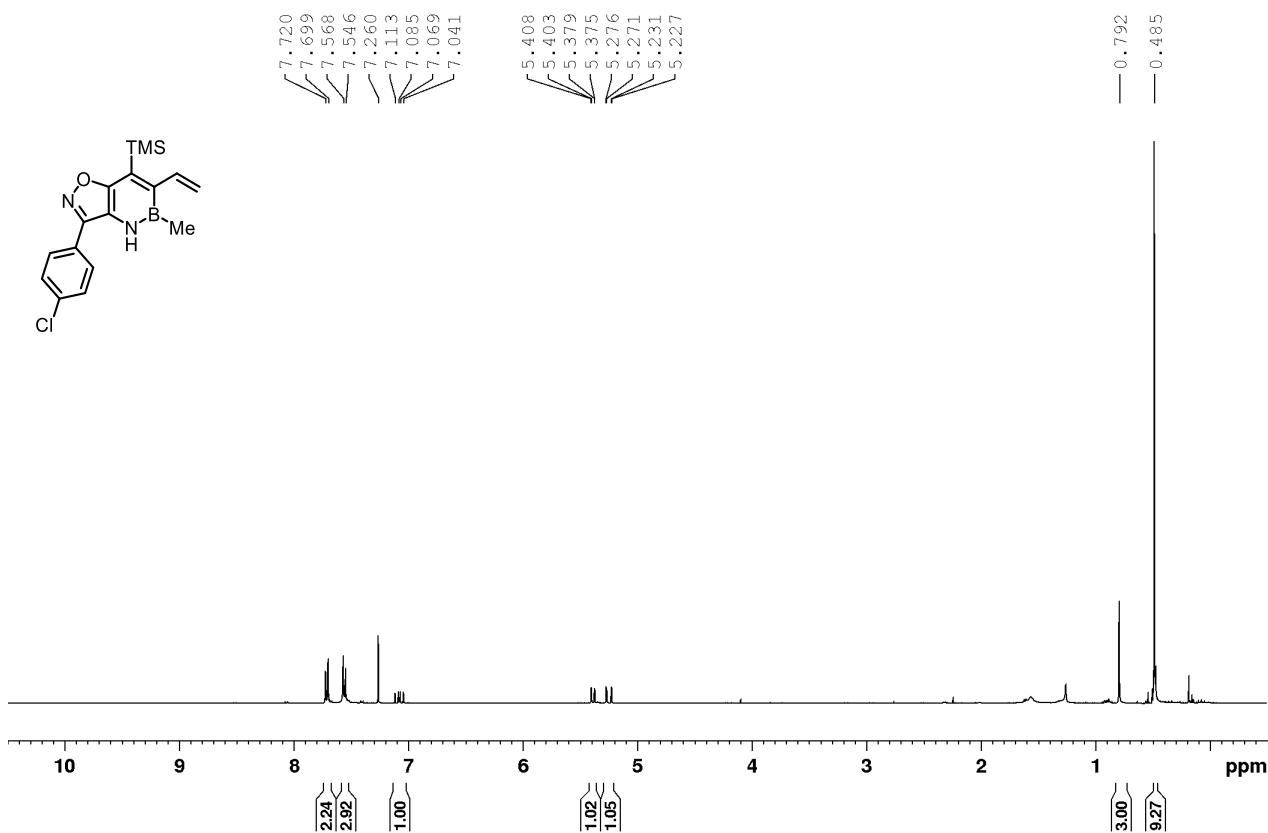

<sup>13</sup>C NMR (125 MHz, CDCl<sub>3</sub>)

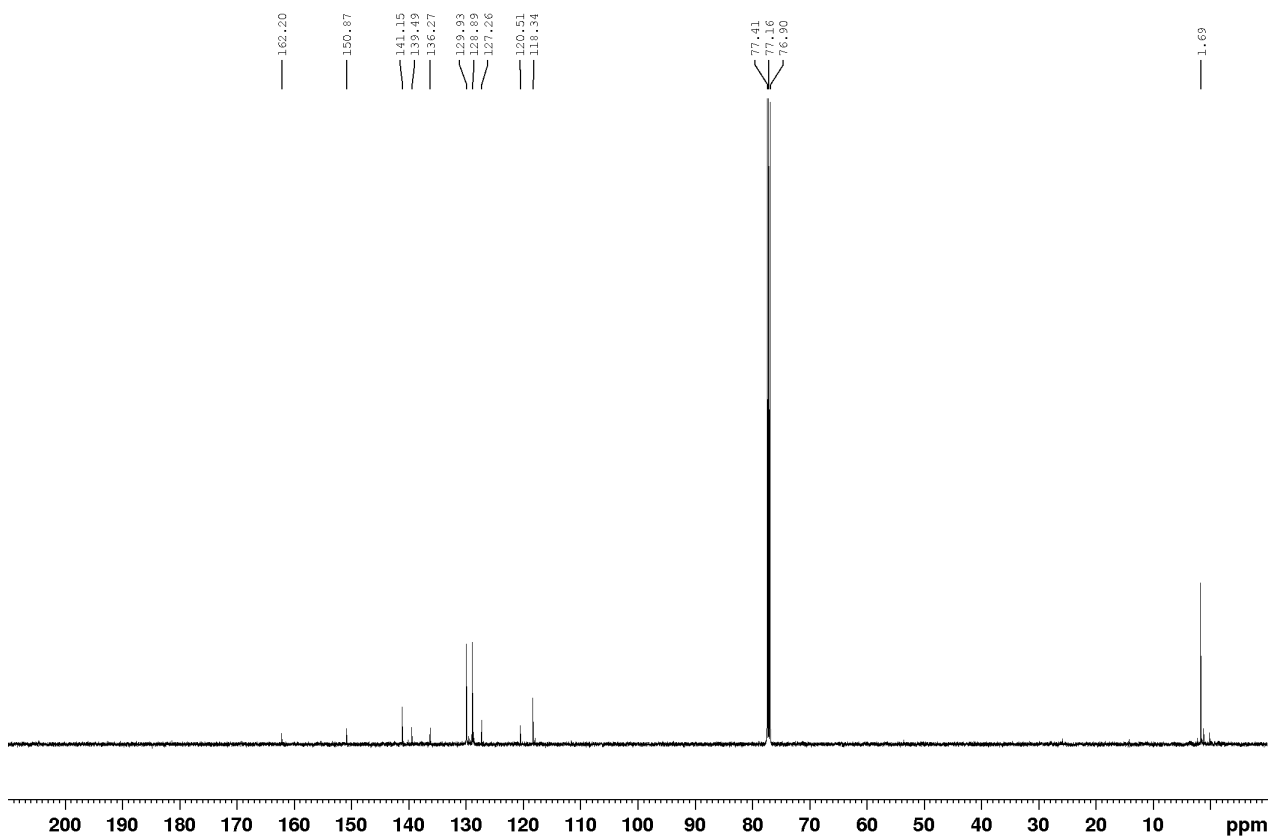

$^{11}\text{B}$  NMR (128 MHz,  $\text{CDCl}_3$ )

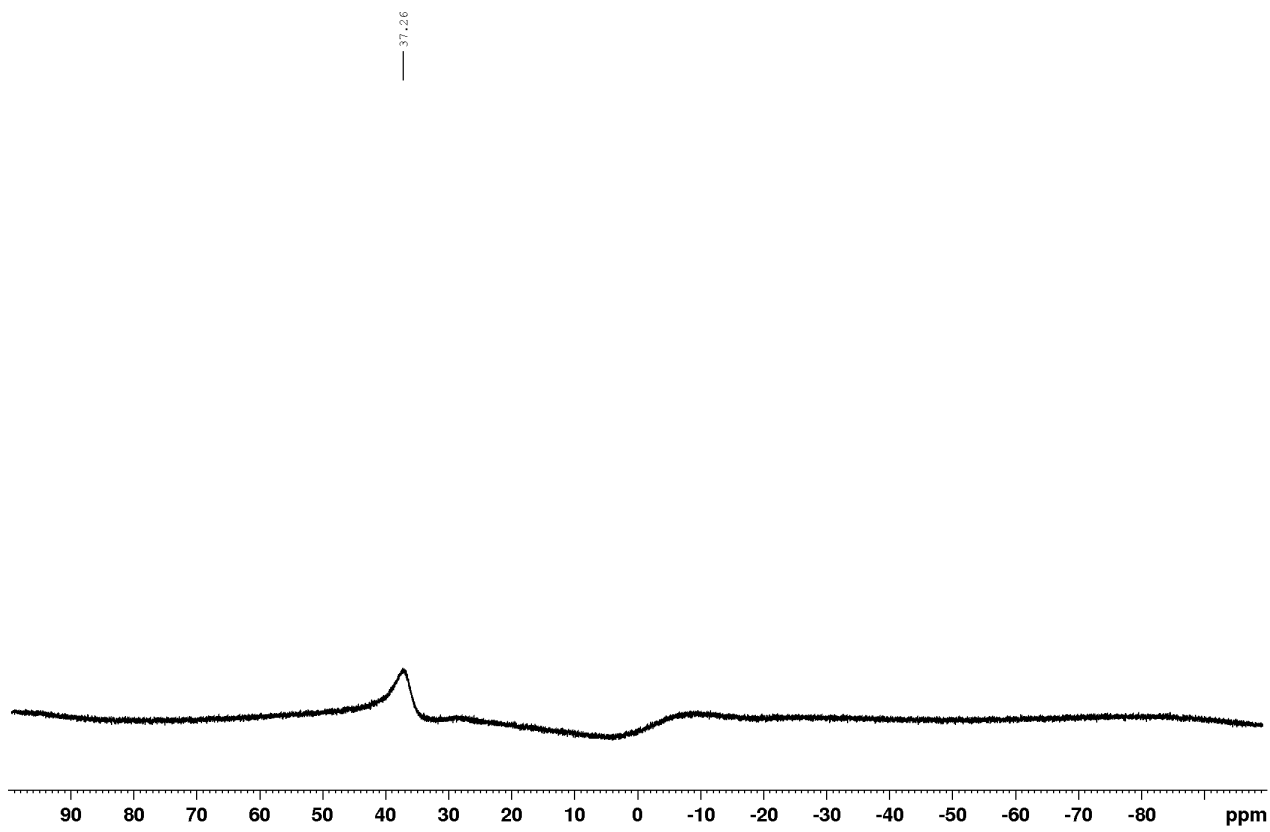

**3-(4-Chlorophenyl)-5-cyclopropyl-7-(trimethylsilyl)-6-vinyl-4,5-dihydroisoxazolo[5,4-e][1,2]azaborinine (5k)**

**<sup>1</sup>H NMR (500 MHz, CDCl<sub>3</sub>)**

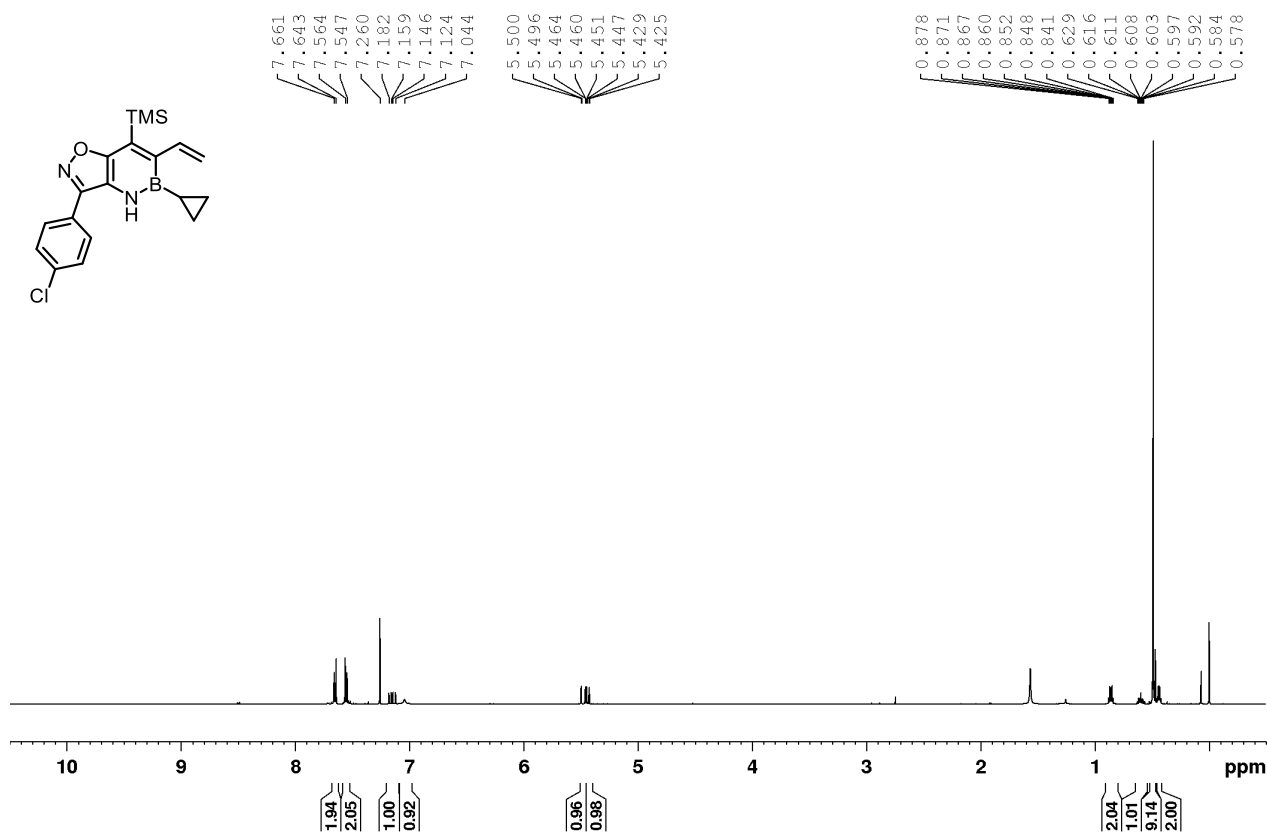

**<sup>13</sup>C NMR (125 MHz, CDCl<sub>3</sub>)**

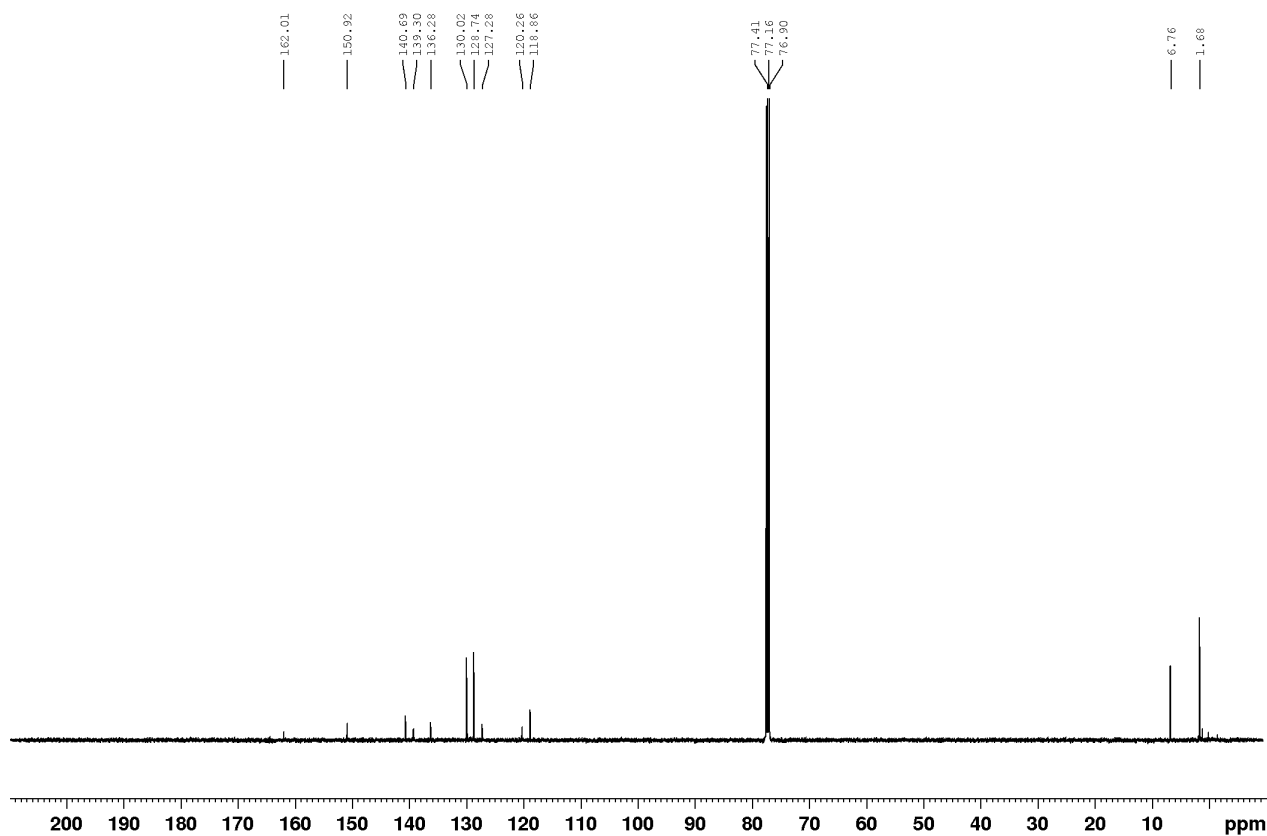

$^{11}\text{B}$  NMR (160 MHz,  $\text{CDCl}_3$ )

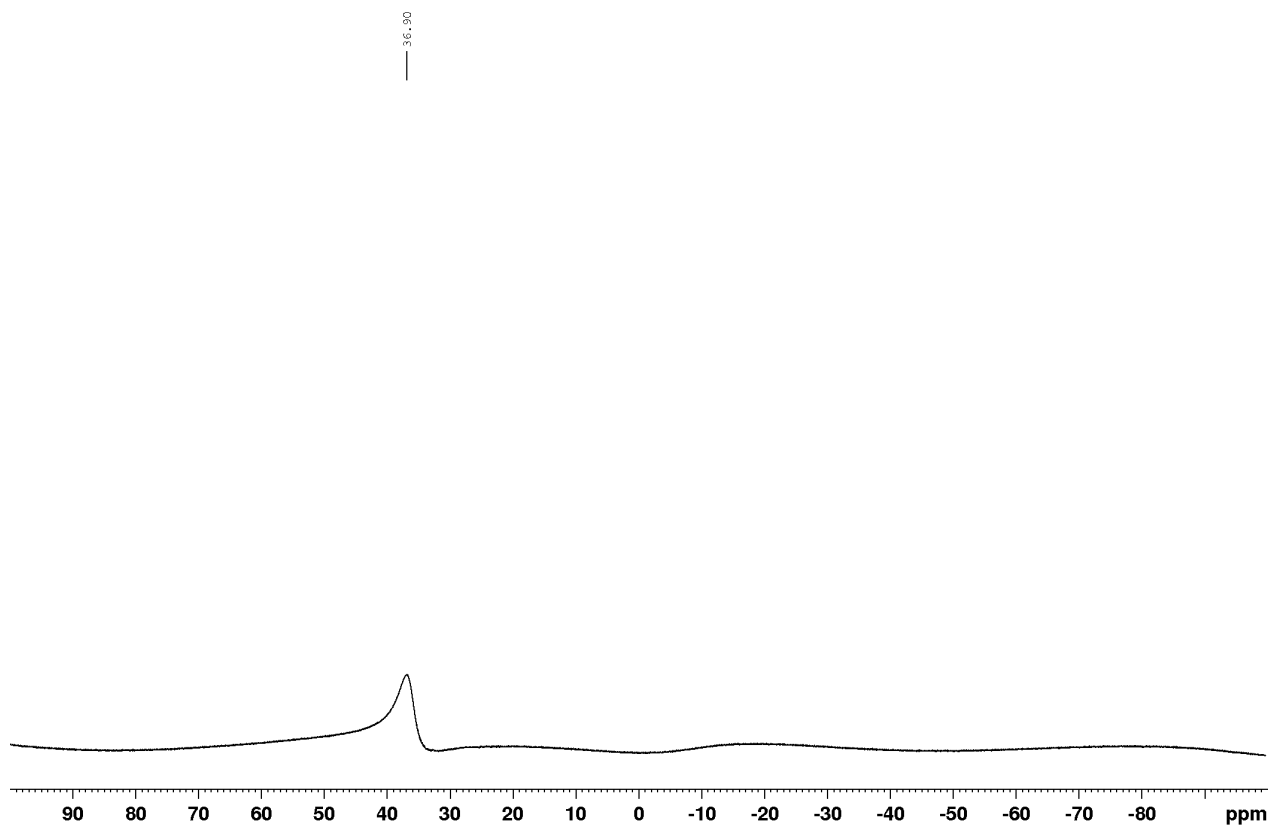

**3-(4-Chlorophenyl)-7-(trimethylsilyl)-5,6-divinyl-4,5-dihydroisoxazolo[5,4-e][1,2]azaborinine (5I)**

<sup>1</sup>H NMR (500 MHz, CDCl<sub>3</sub>)

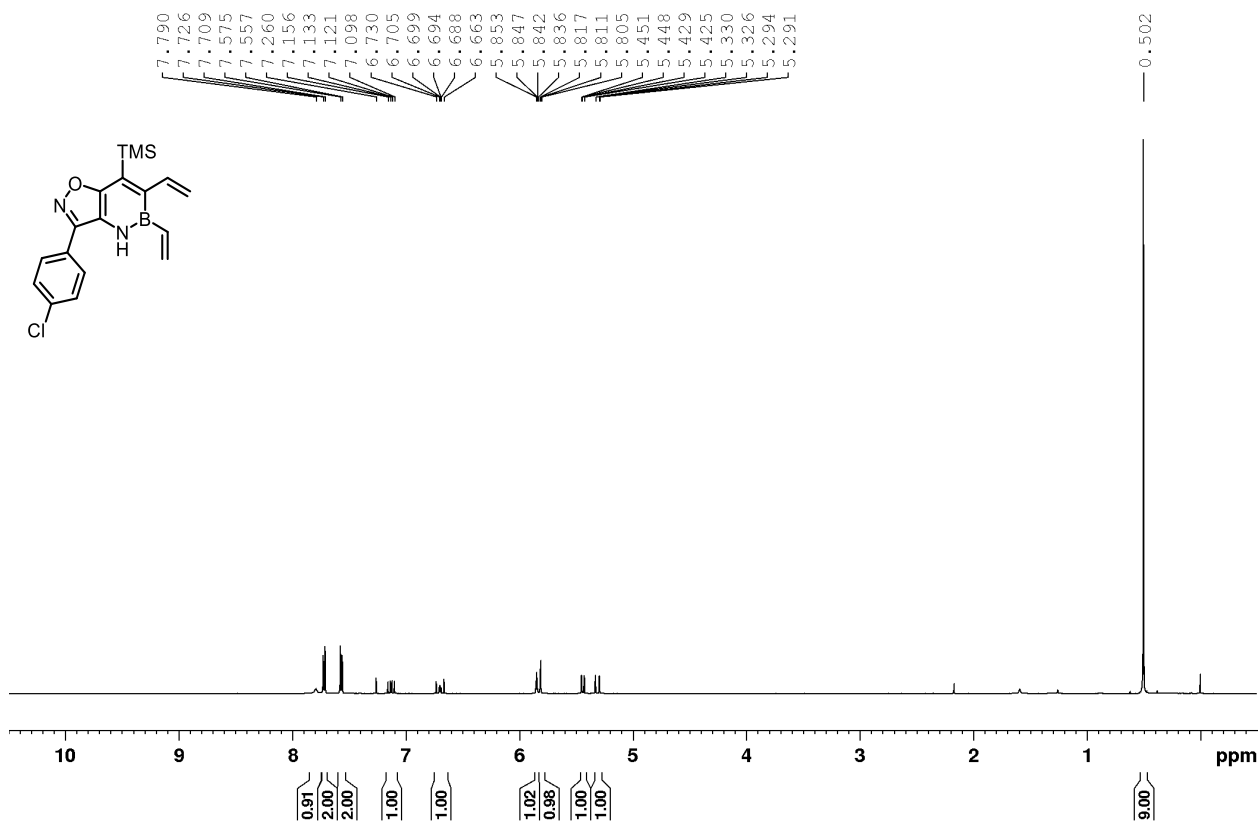

<sup>13</sup>C NMR (125 MHz, CDCl<sub>3</sub>)

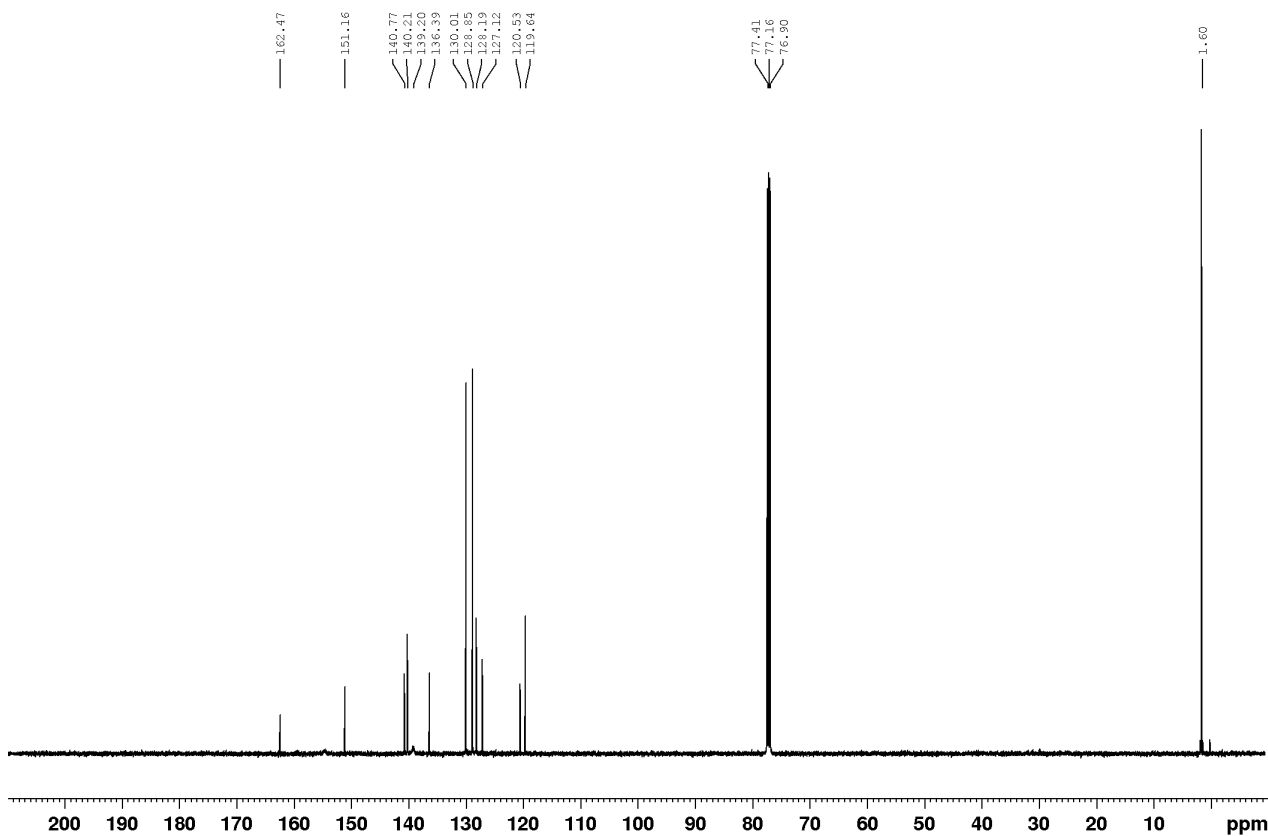

$^{11}\text{B}$  NMR (160 MHz,  $\text{CDCl}_3$ )

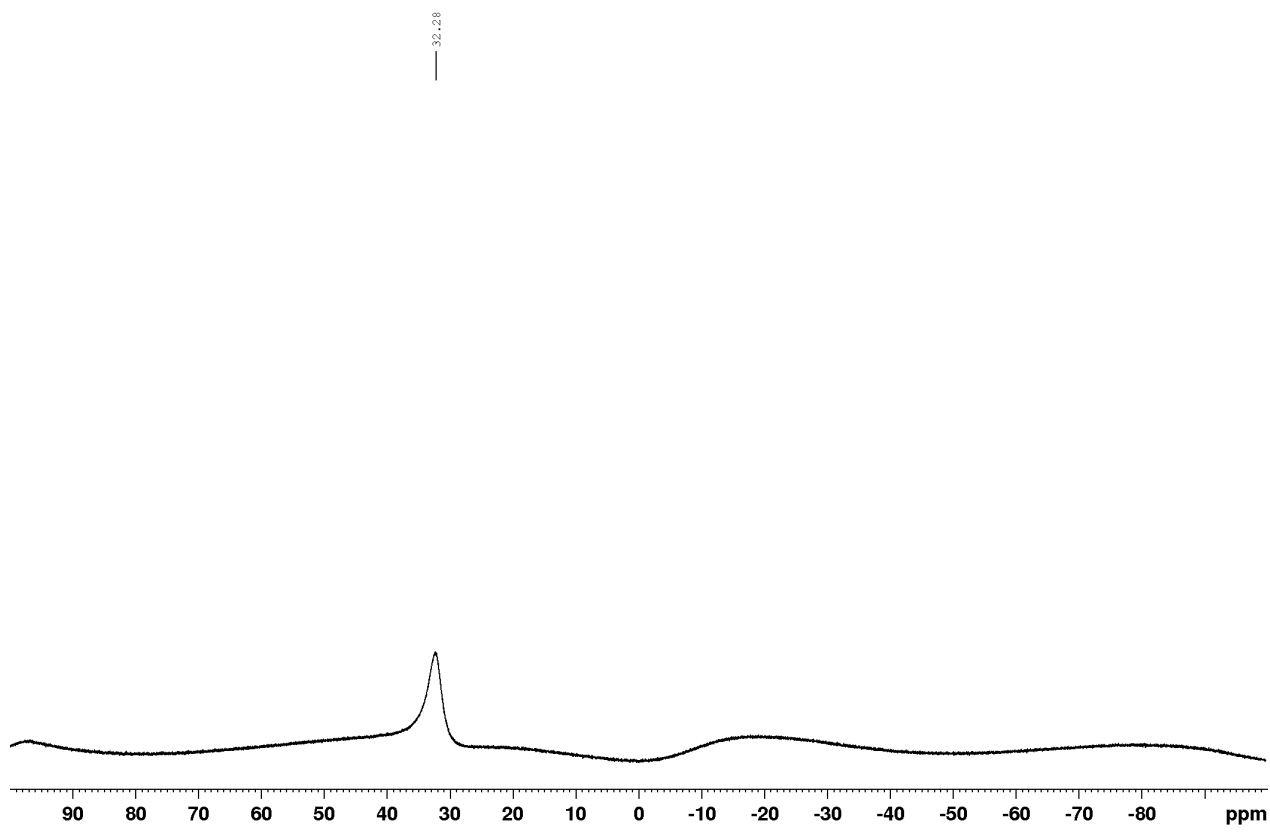

**3-(4-Chlorophenyl)-5-(prop-1-en-2-yl)-7-(trimethylsilyl)-6-vinyl-4,5-dihydroisoxazolo[5,4-e][1,2]azaborinine (5m)**

**<sup>1</sup>H NMR (500 MHz, CDCl<sub>3</sub>)**

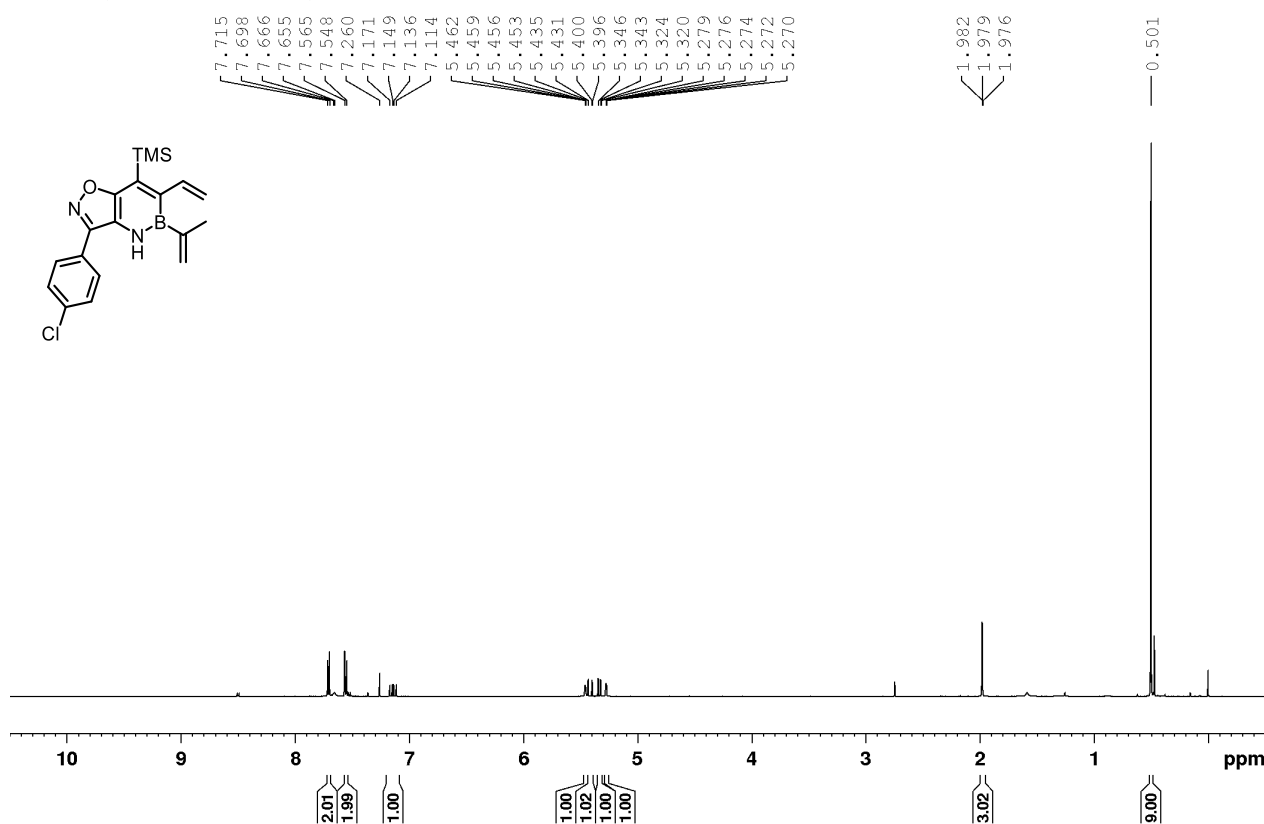

**<sup>13</sup>C NMR (125 MHz, CDCl<sub>3</sub>)**

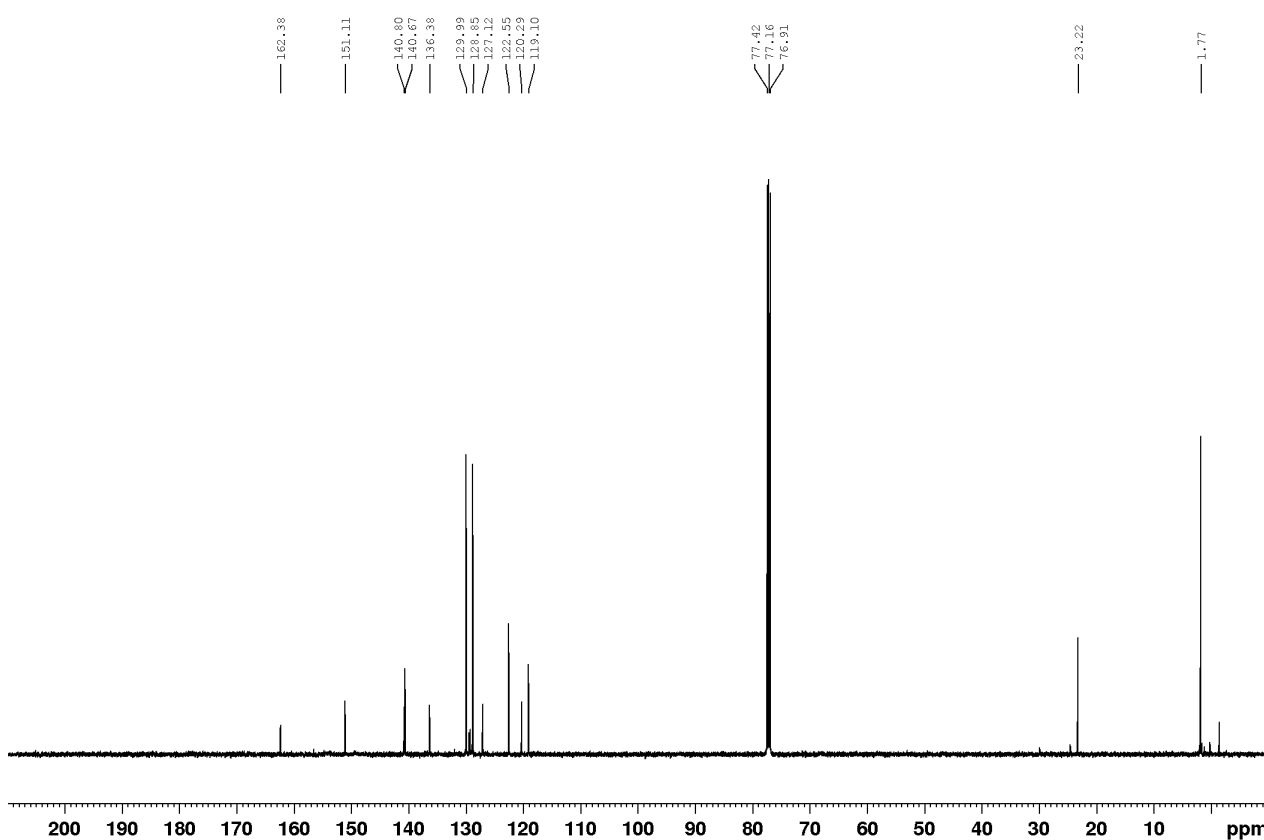



$^{11}\text{B}$  NMR (160 MHz,  $\text{CDCl}_3$ )

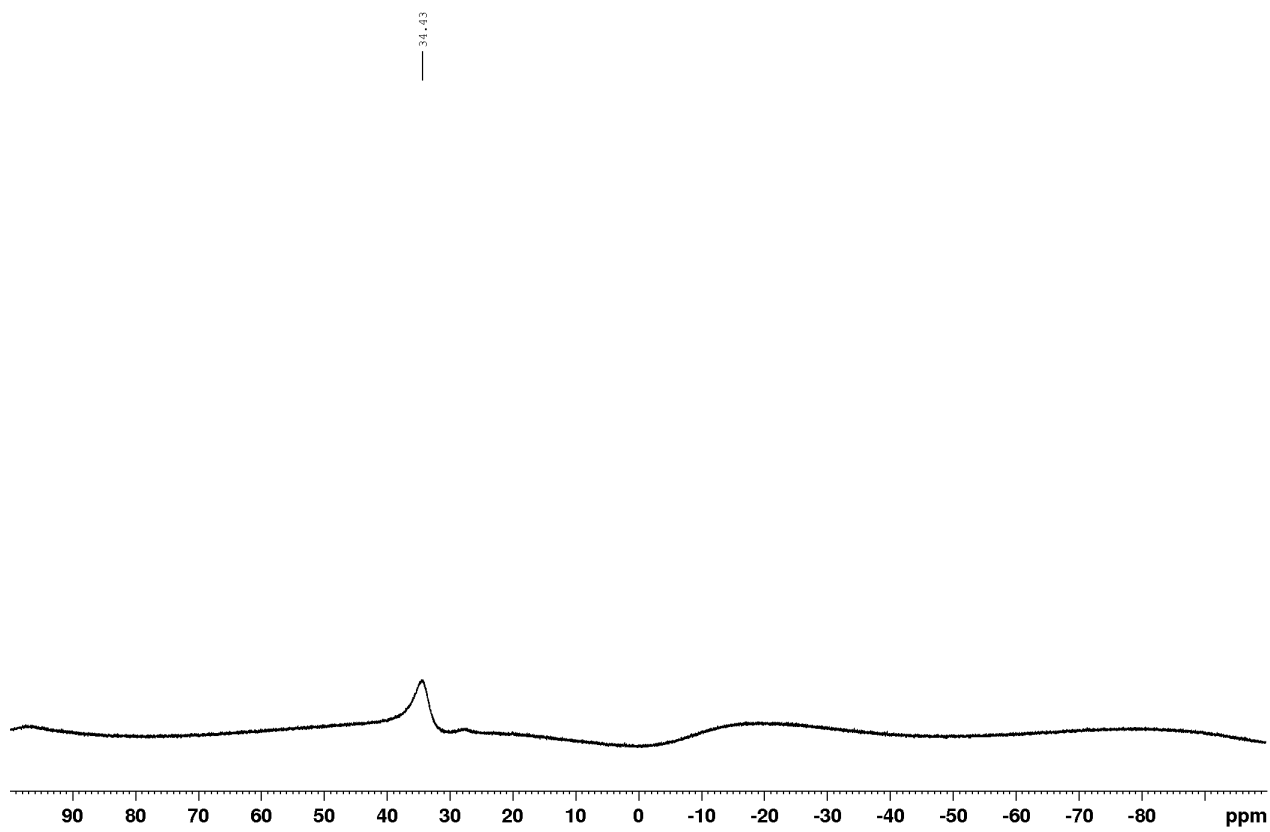

### 3,5-Diphenyl-7-(trimethylsilyl)-6-vinyl-4,5-dihydroisoxazolo[5,4-e][1,2]azaborinine (5n)

<sup>1</sup>H NMR (500 MHz, CDCl<sub>3</sub>)

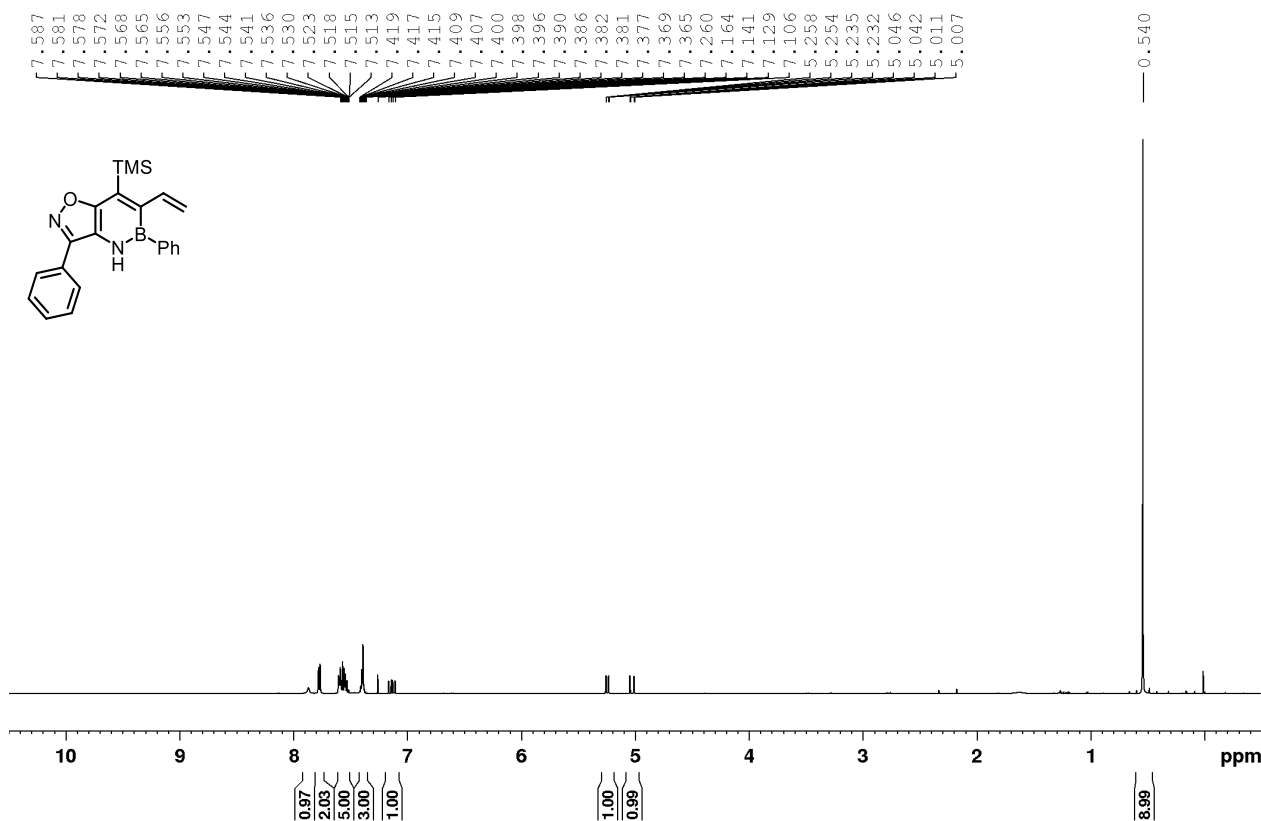

<sup>13</sup>C NMR (125 MHz, CDCl<sub>3</sub>)

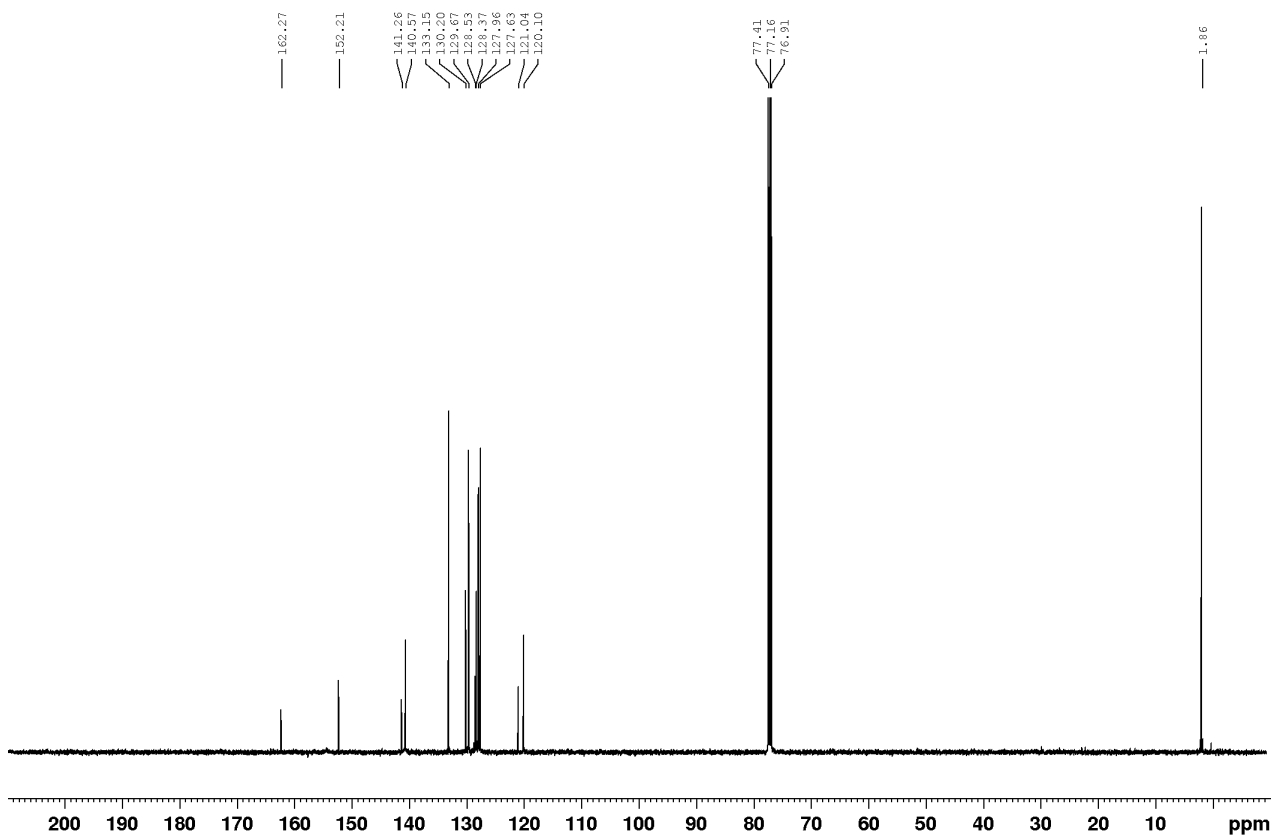

$^{11}\text{B}$  NMR (160 MHz,  $\text{CDCl}_3$ )

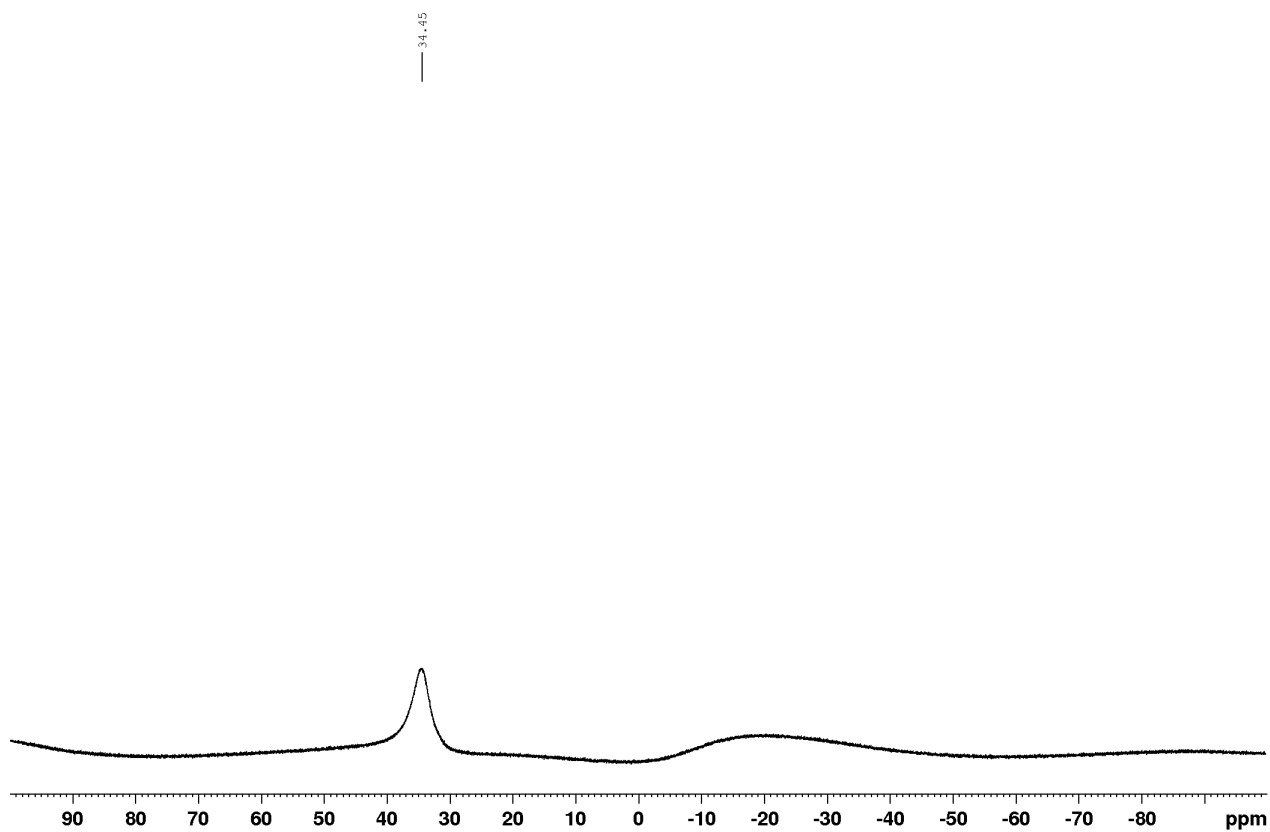

**5-Phenyl-3-(*p*-tolyl)-7-(trimethylsilyl)-6-vinyl-4,5-dihydroisoxazolo[5,4-*e*][1,2]azaborinine (5o)**  
<sup>1</sup>H NMR (500 MHz, CDCl<sub>3</sub>)

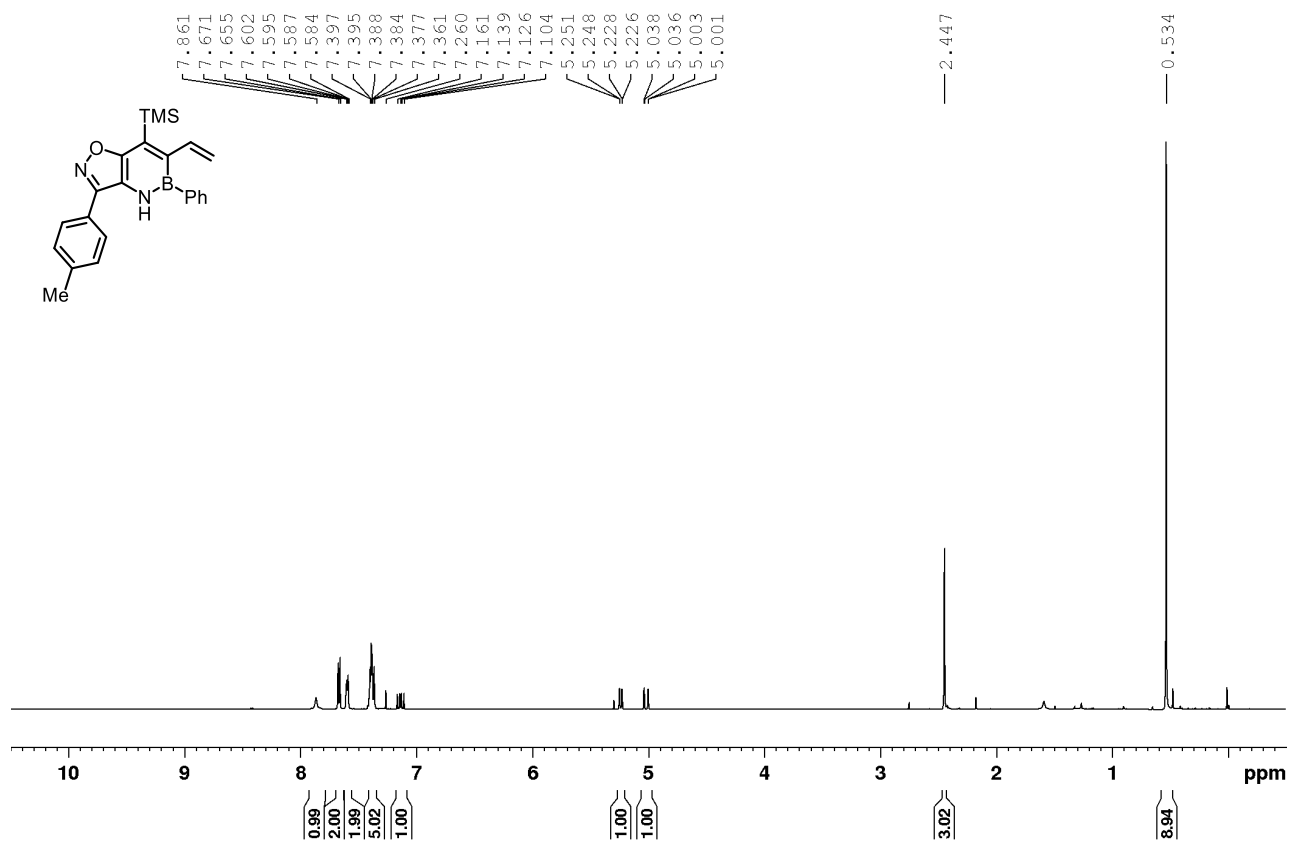

<sup>13</sup>C NMR (125 MHz, CDCl<sub>3</sub>)

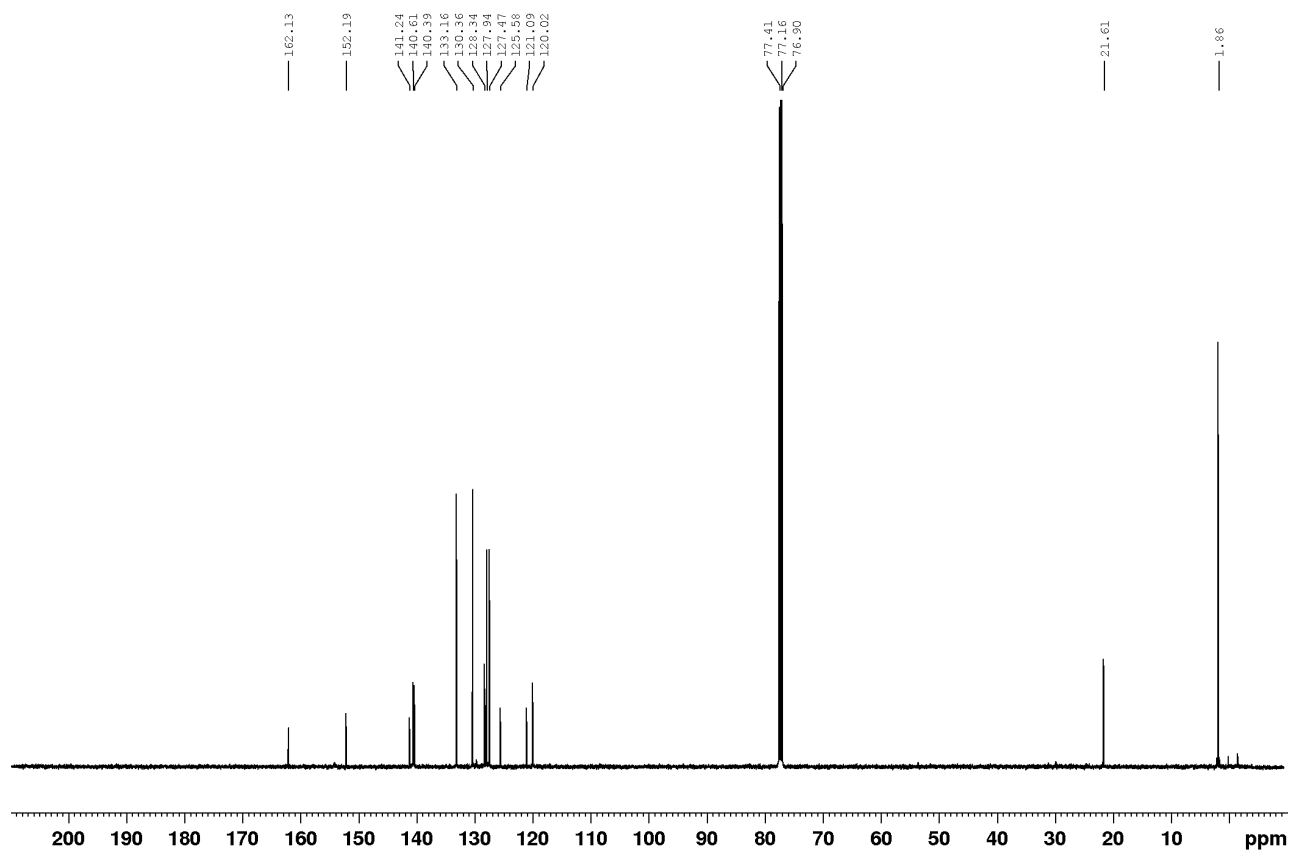

$^{11}\text{B}$  NMR (160 MHz,  $\text{CDCl}_3$ )

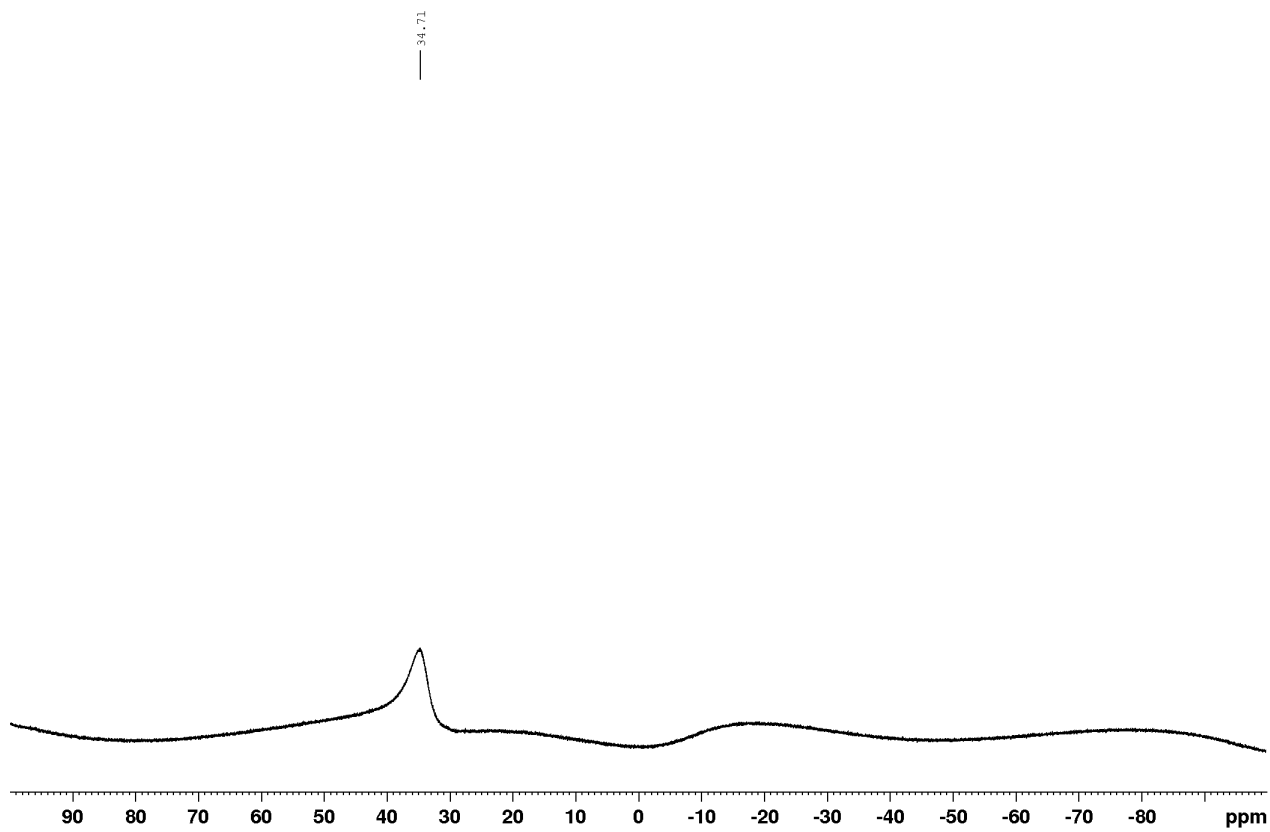

**3-(4-Methoxyphenyl)-5-phenyl-7-(trimethylsilyl)-6-vinyl-4,5-dihydroisoxazolo[5,4-e][1,2]azaborinine (5p)**

**<sup>1</sup>H NMR (500 MHz, CDCl<sub>3</sub>)**

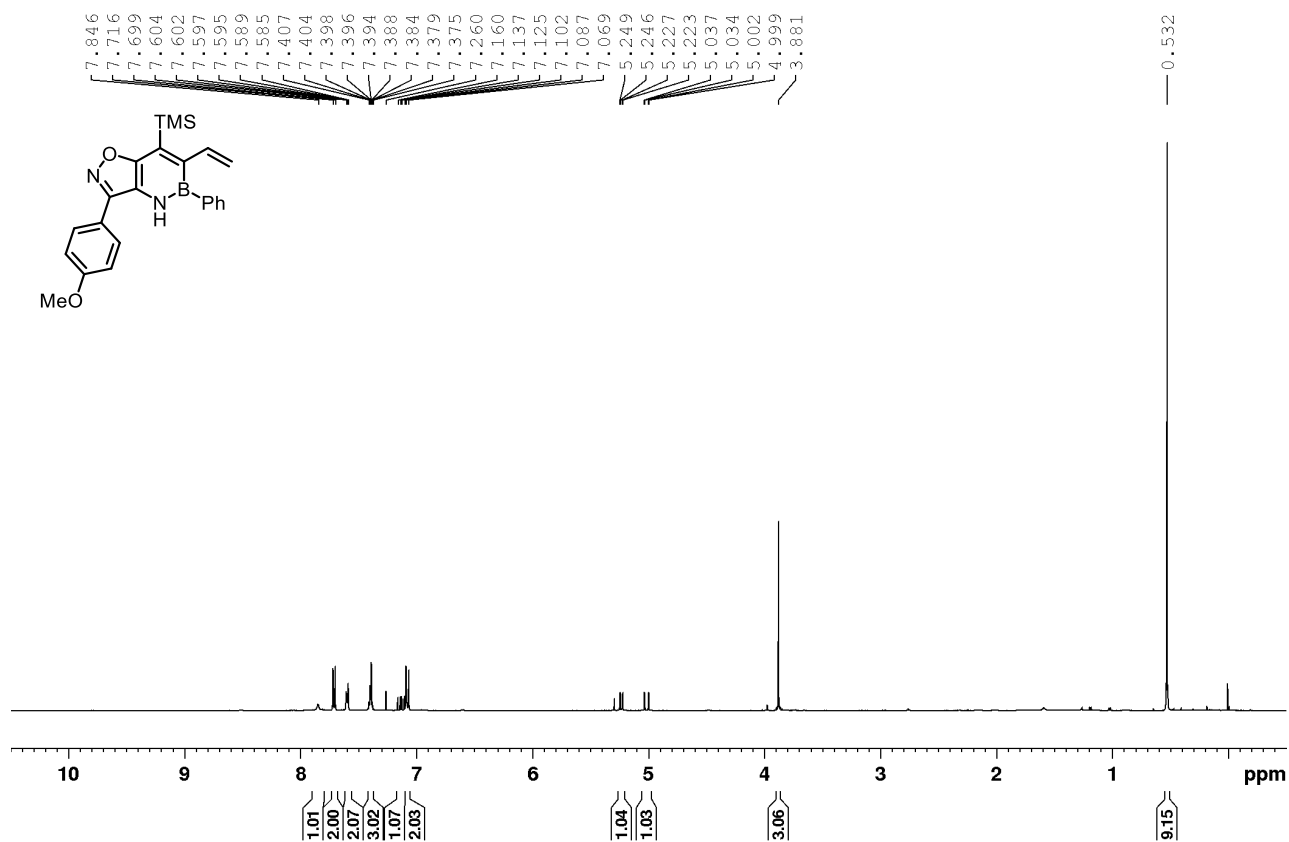

**<sup>13</sup>C NMR (125 MHz, CDCl<sub>3</sub>)**

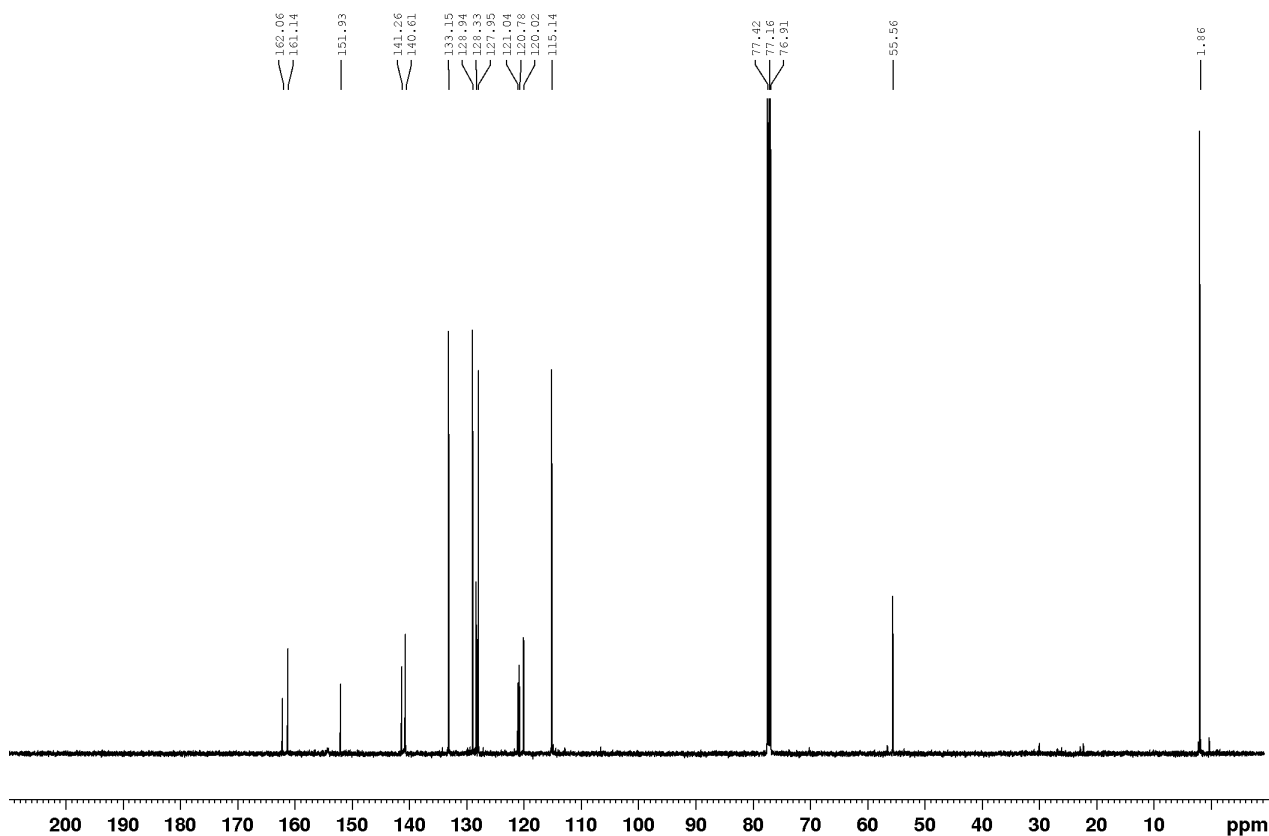

$^{11}\text{B}$  NMR (160 MHz,  $\text{CDCl}_3$ )

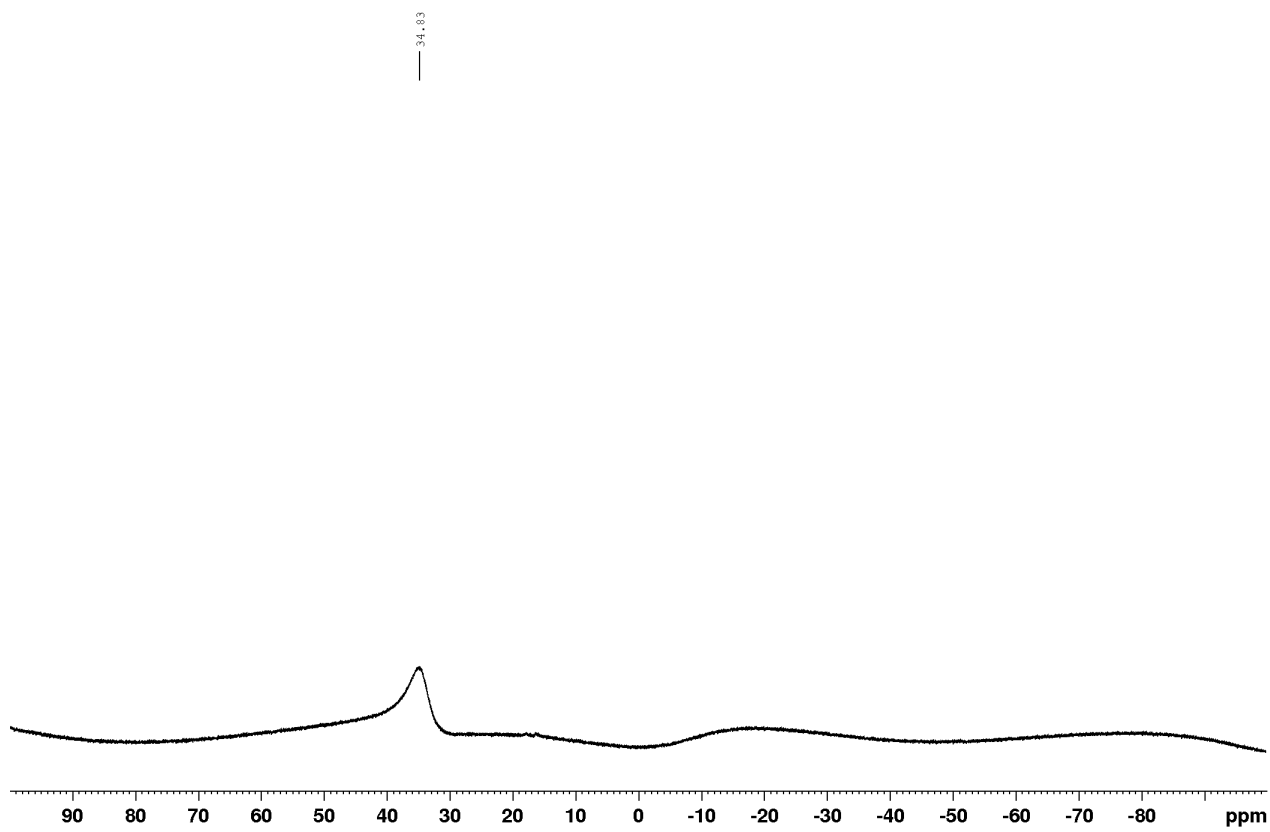

**3-(*tert*-Butyl)-5-phenyl-7-(trimethylsilyl)-6-vinyl-4,5-dihydroisoxazolo[5,4-*e*][1,2]azaborinine (5q)**

**<sup>1</sup>H NMR (500 MHz, CDCl<sub>3</sub>)**

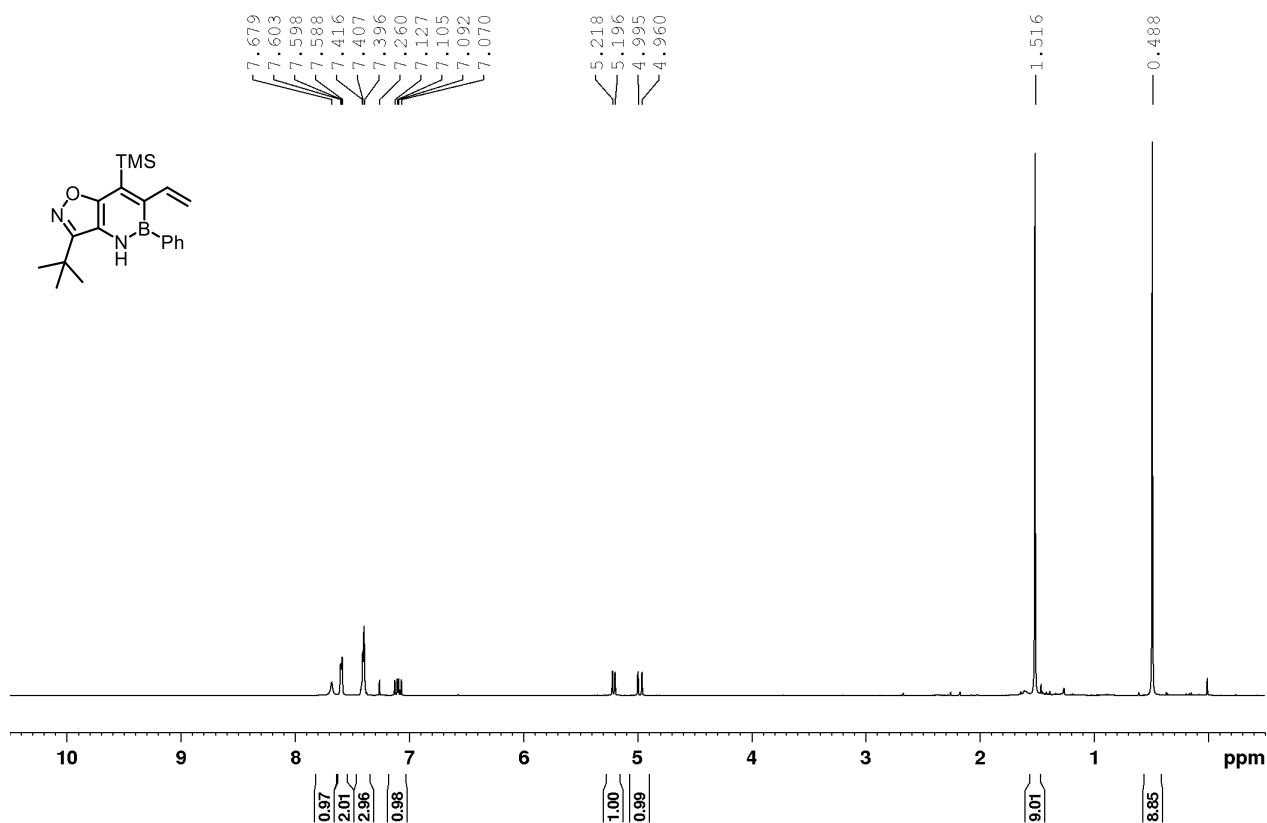

**<sup>13</sup>C NMR (125 MHz, CDCl<sub>3</sub>)**

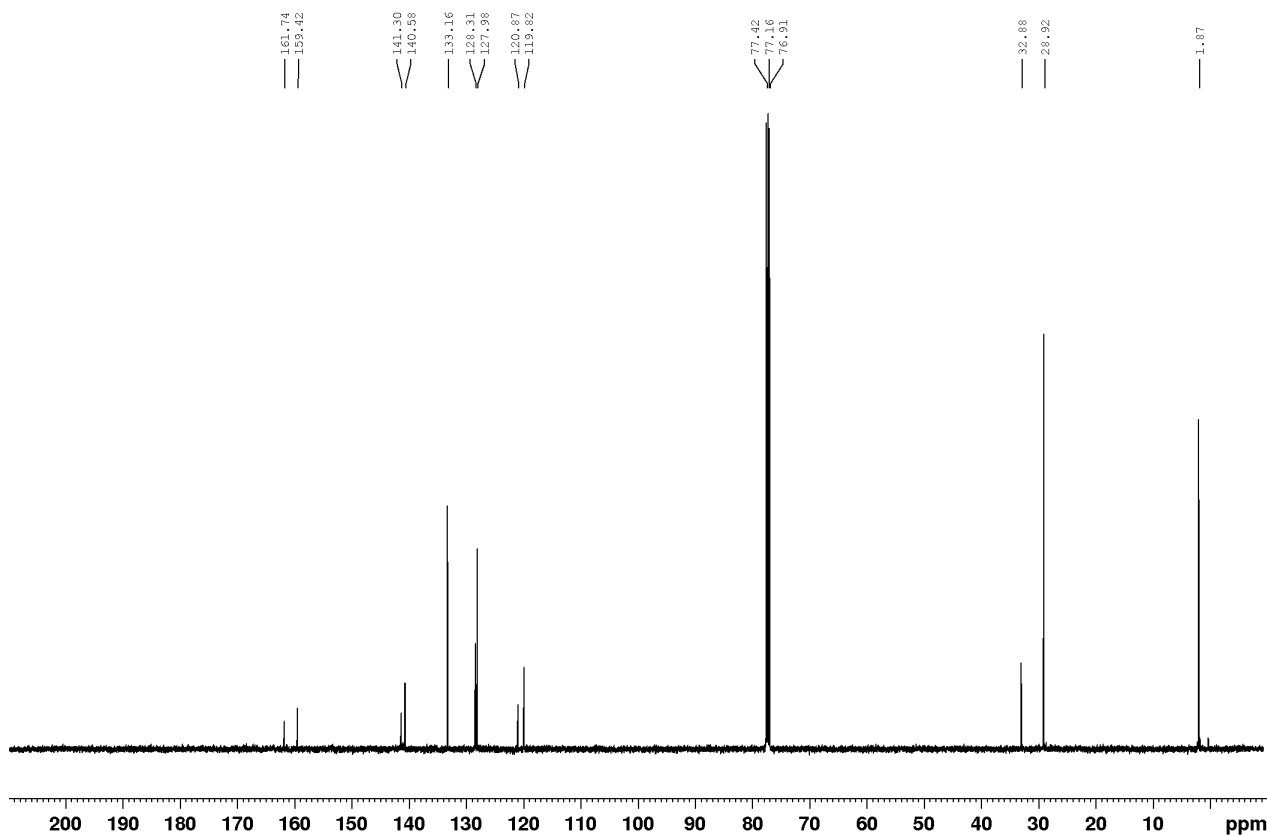



$^{11}\text{B}$  NMR (160 MHz,  $\text{CDCl}_3$ )

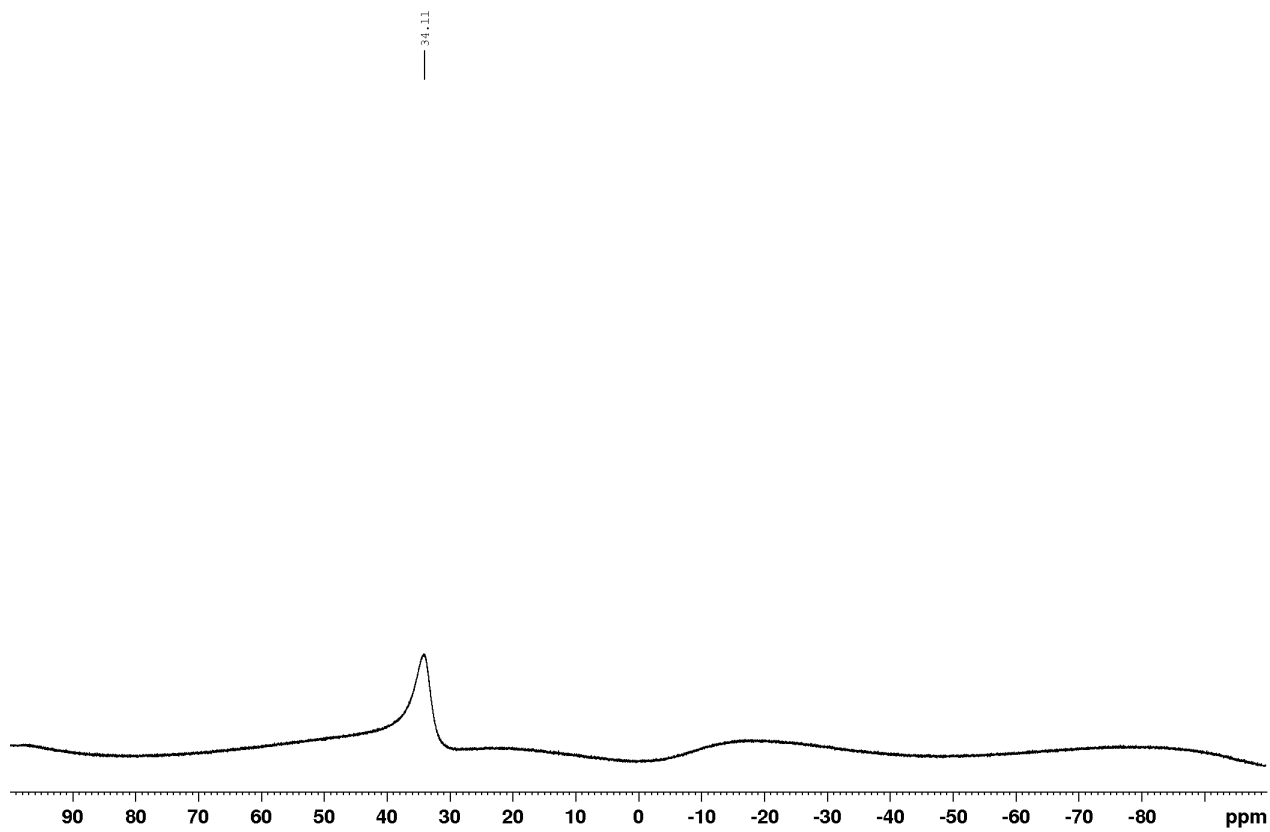

**3-Pentyl-5-phenyl-7-(trimethylsilyl)-6-vinyl-4,5-dihydroisoxazolo[5,4-e][1,2]azaborinine (5r)**

**<sup>1</sup>H NMR (500 MHz, CDCl<sub>3</sub>)**

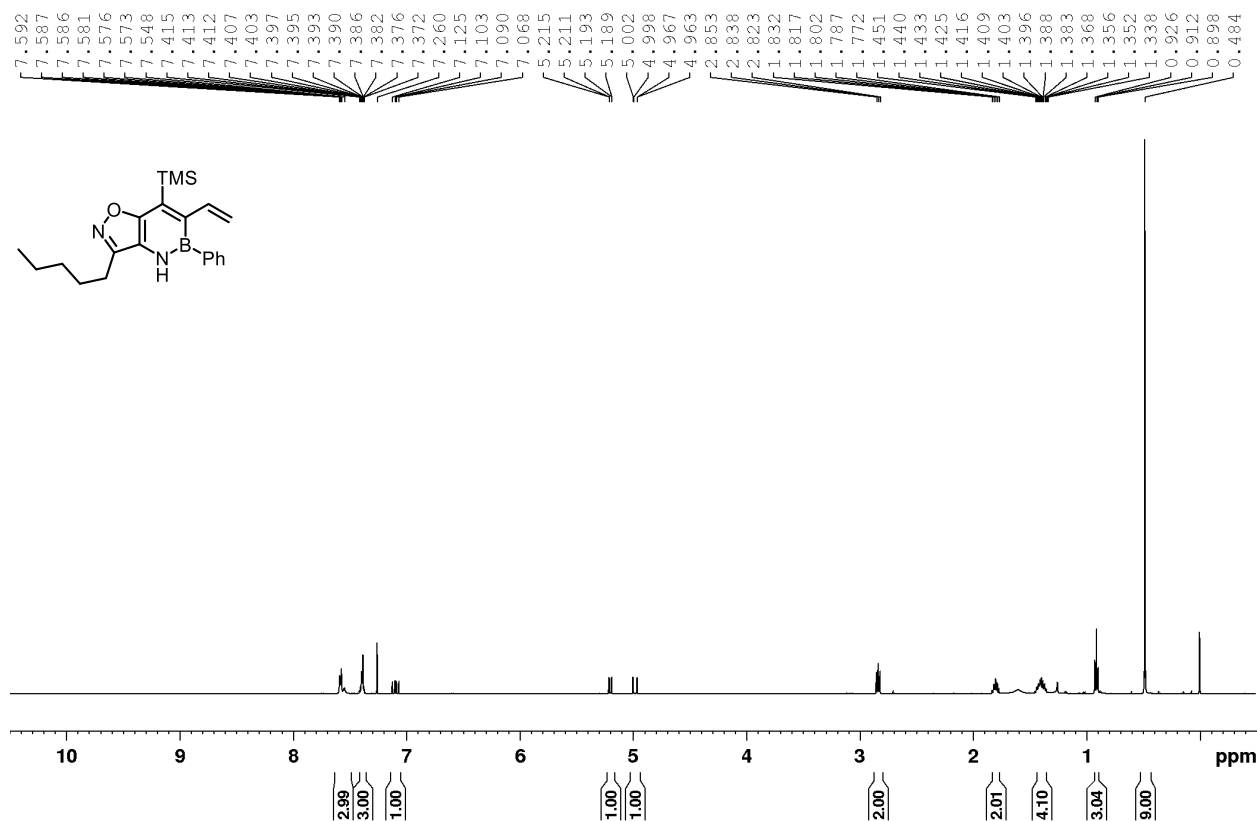

**<sup>13</sup>C NMR (125 MHz, CDCl<sub>3</sub>)**

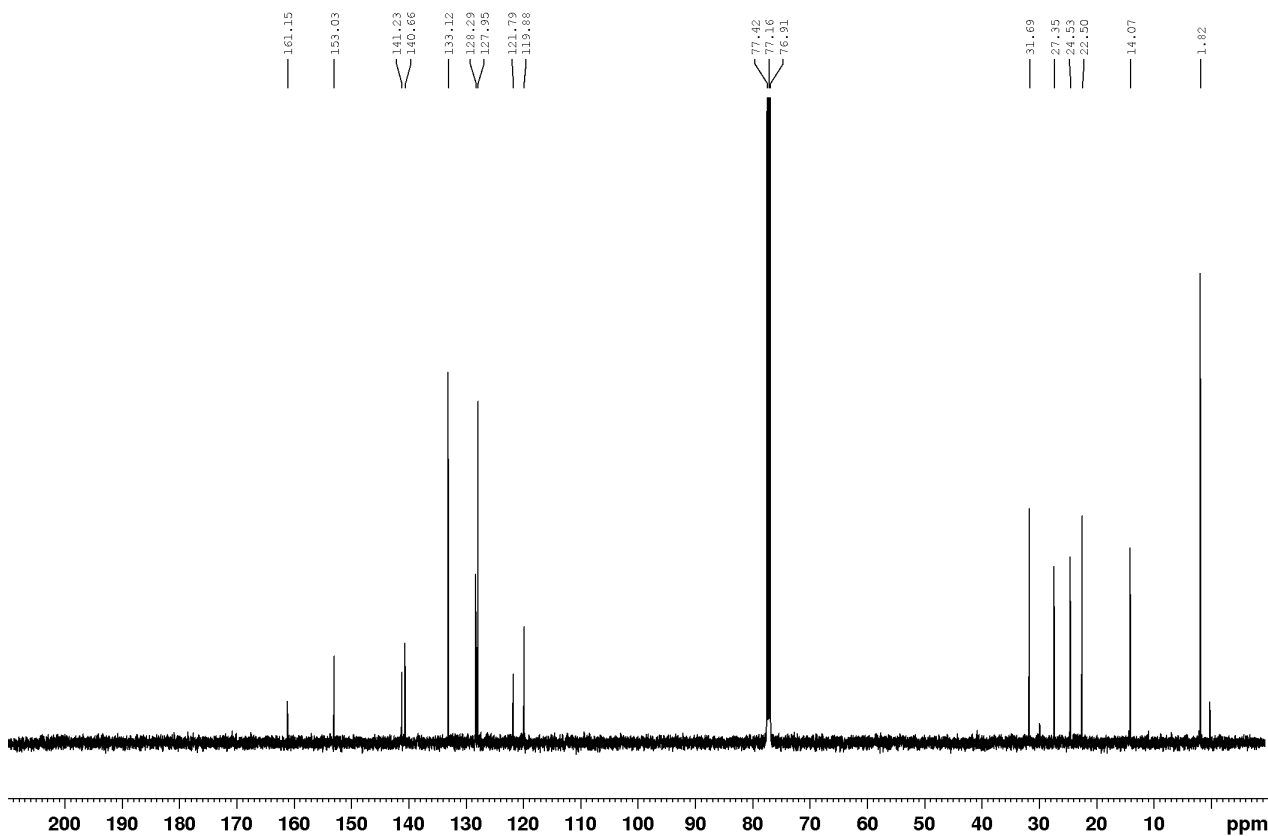

$^{11}\text{B}$  NMR (160 MHz,  $\text{CDCl}_3$ )

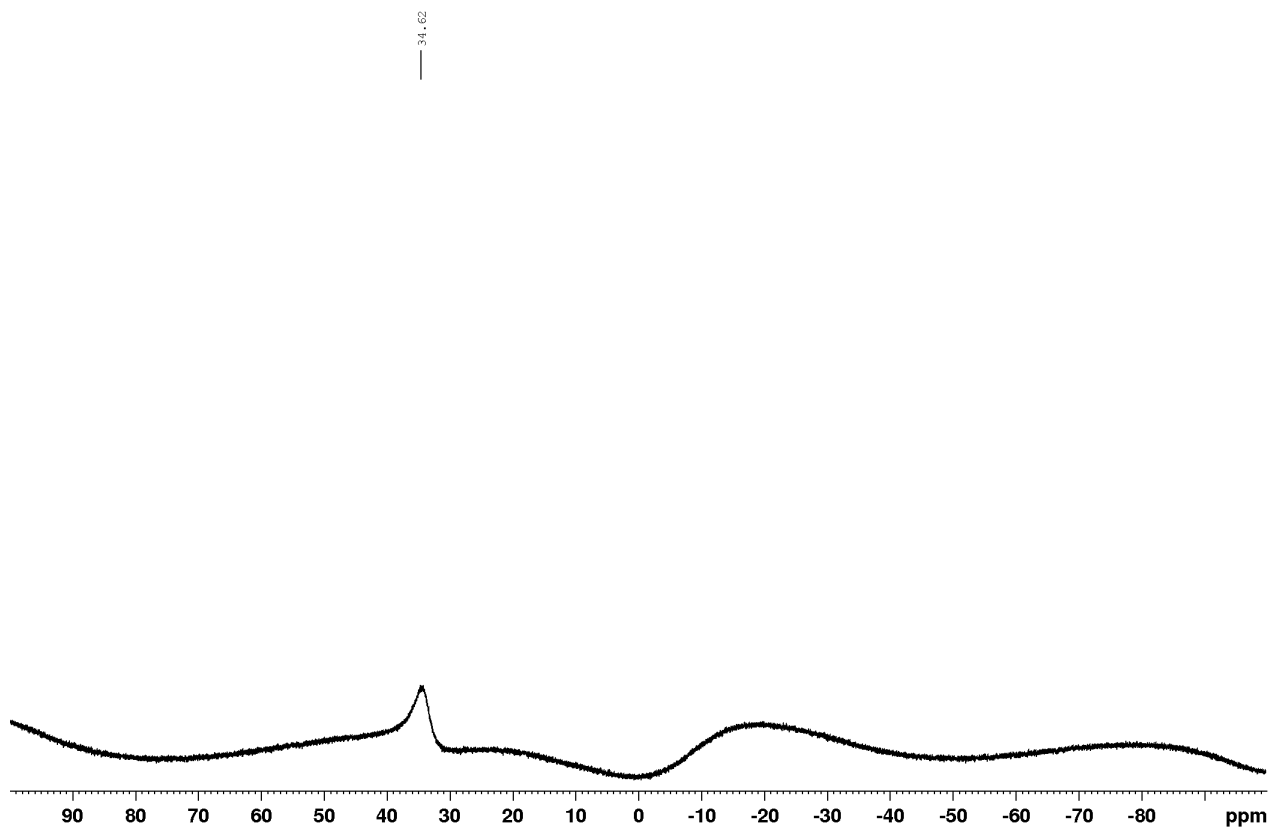

**(E)-3-(4-Chlorophenyl)-6-(pent-1-en-1-yl)-5-phenyl-7-(trimethylsilyl)-4,5-dihydroisoxazolo[5,4-e][1,2]azaborinine (5s)**

**<sup>1</sup>H NMR (500 MHz, CDCl<sub>3</sub>)**

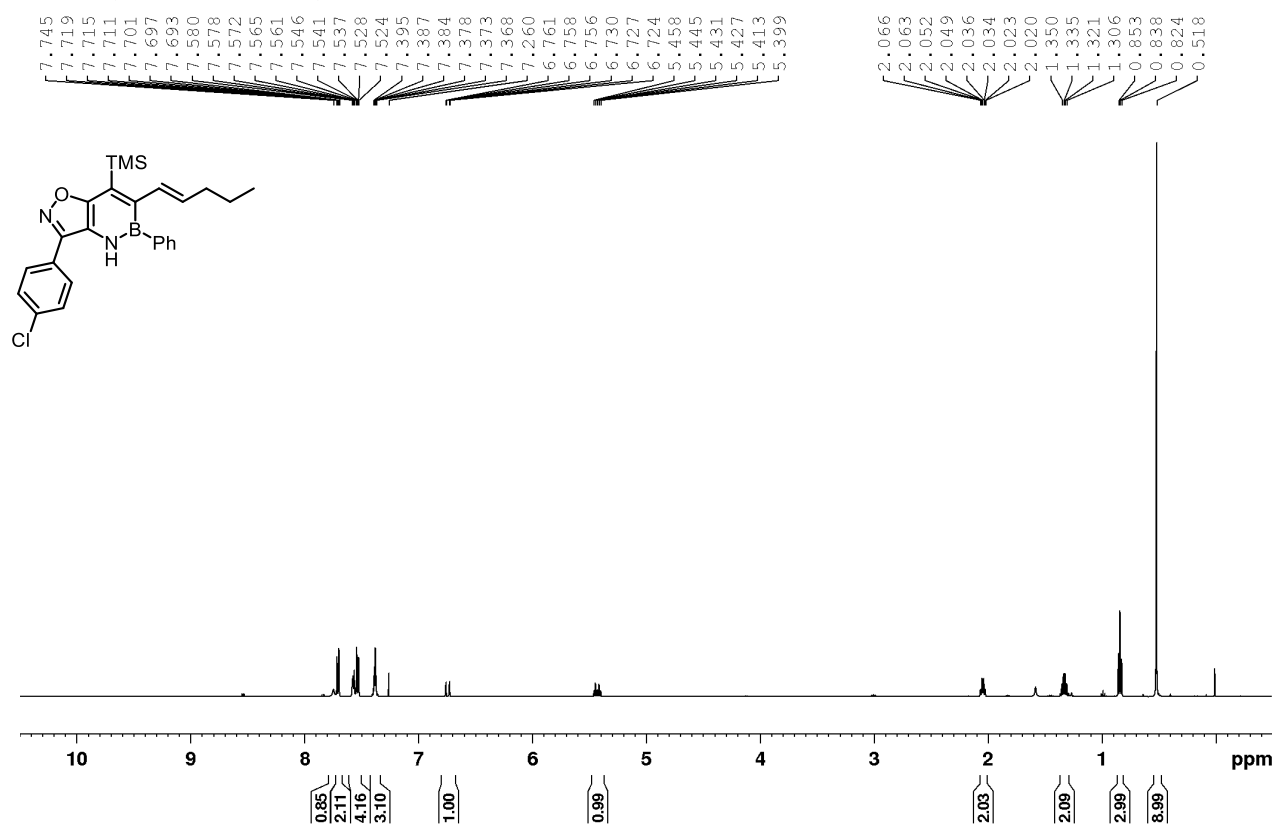

**<sup>13</sup>C NMR (125 MHz, CDCl<sub>3</sub>)**

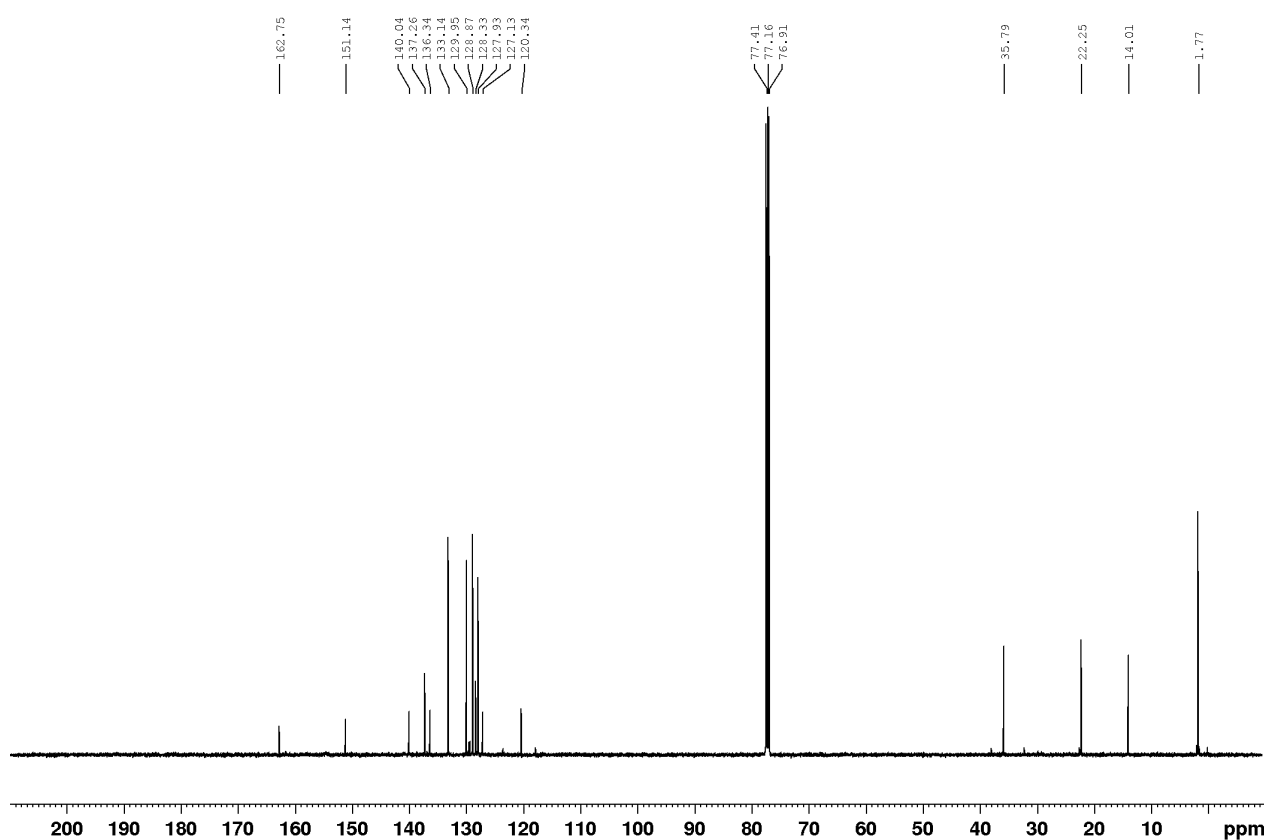

$^{11}\text{B}$  NMR (160 MHz,  $\text{CDCl}_3$ )

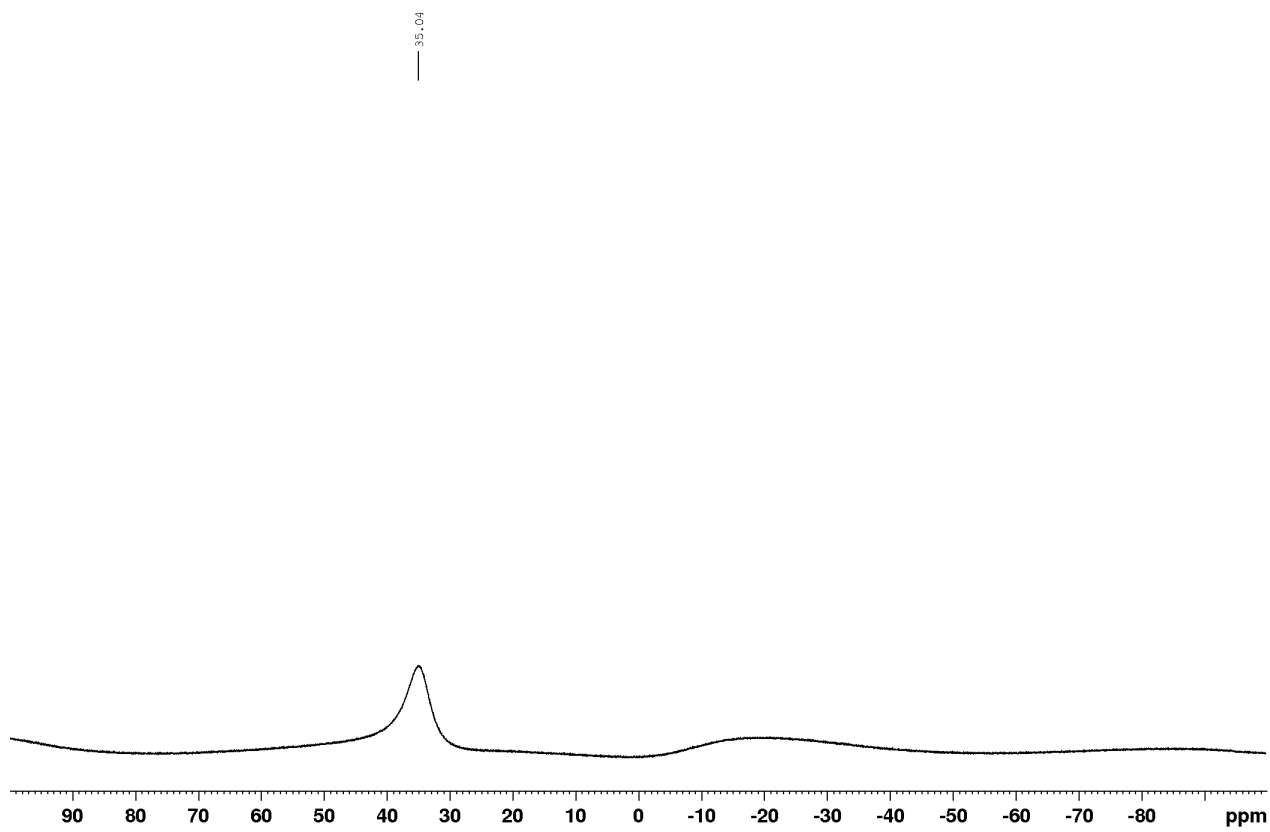

**(E)-3-(4-Chlorophenyl)-5-phenyl-6-styryl-7-(trimethylsilyl)-4,5-dihydroisoxazolo[5,4-e][1,2]azaborinine (5t)**

**<sup>1</sup>H NMR (400 MHz, CDCl<sub>3</sub>)**

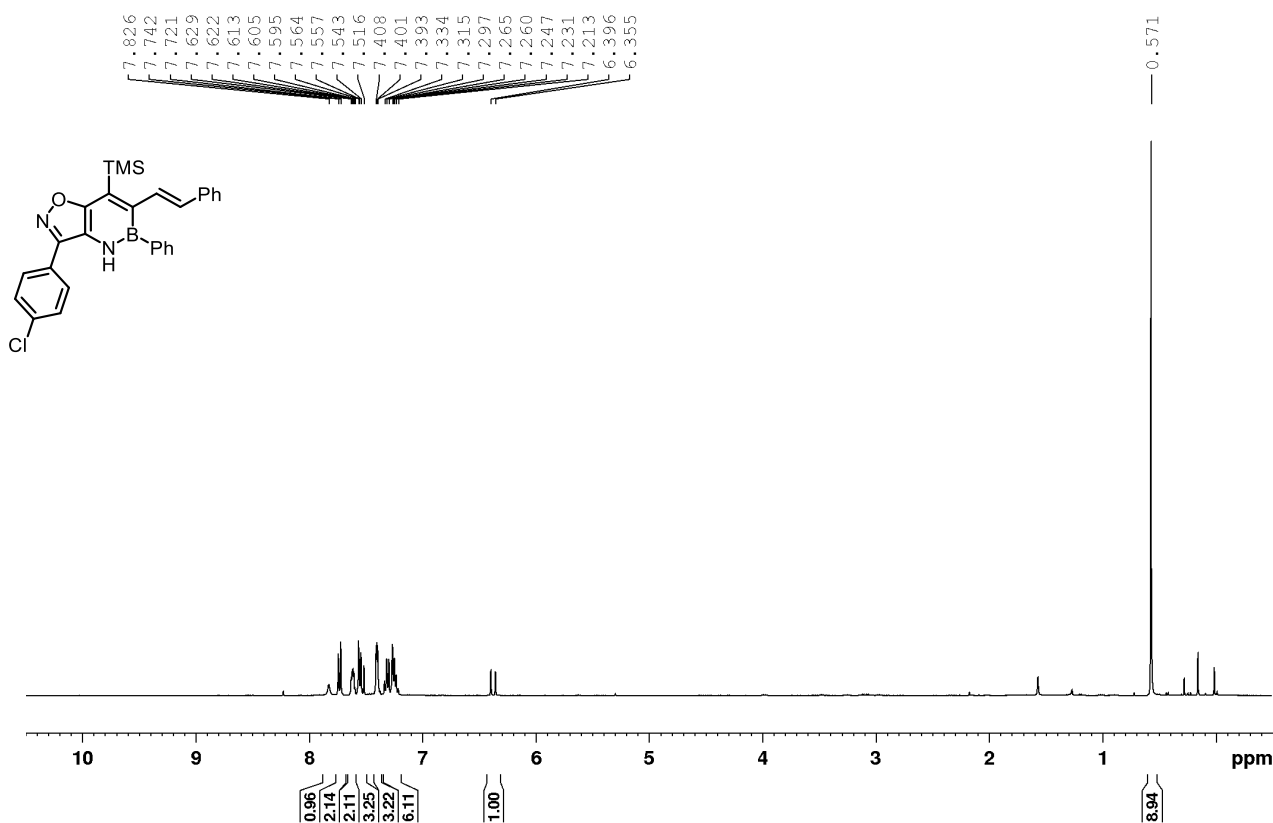

**<sup>13</sup>C NMR (125 MHz, CDCl<sub>3</sub>)**

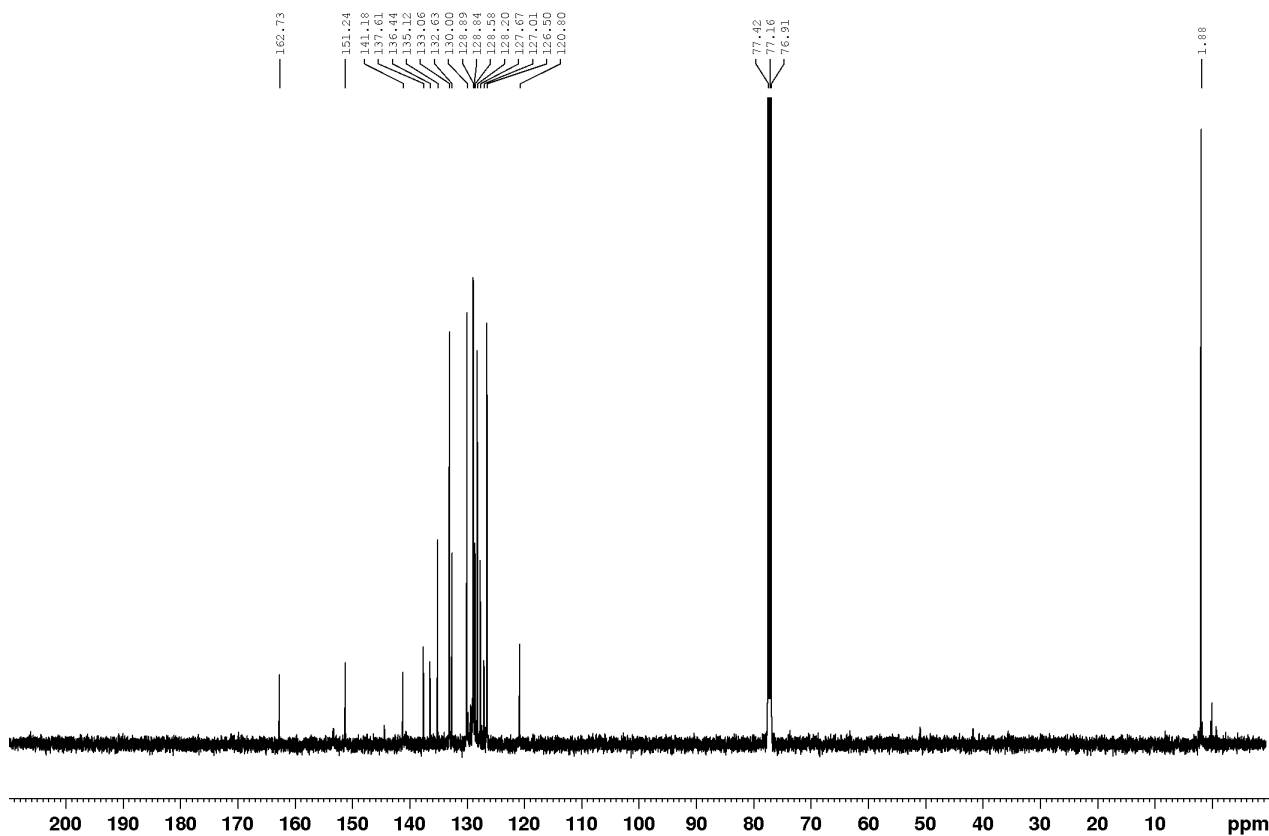

$^{11}\text{B}$  NMR (160 MHz,  $\text{CDCl}_3$ )

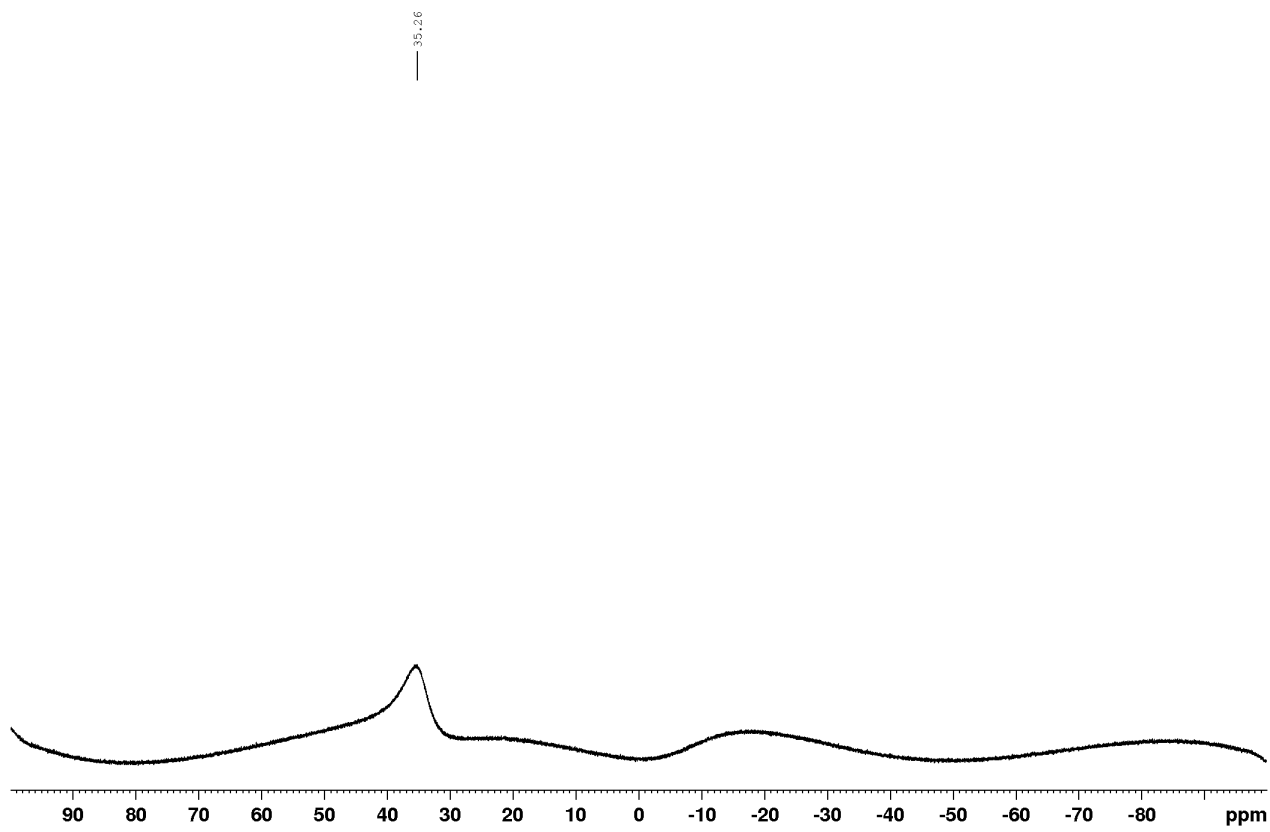

**3-(4-Chlorophenyl)-7-(dimethyl(phenyl)silyl)-5-phenyl-6-vinyl-4,5-dihydroisoxazolo[5,4-e][1,2]azaborinine (5u)**

**<sup>1</sup>H NMR (500 MHz, CDCl<sub>3</sub>)**

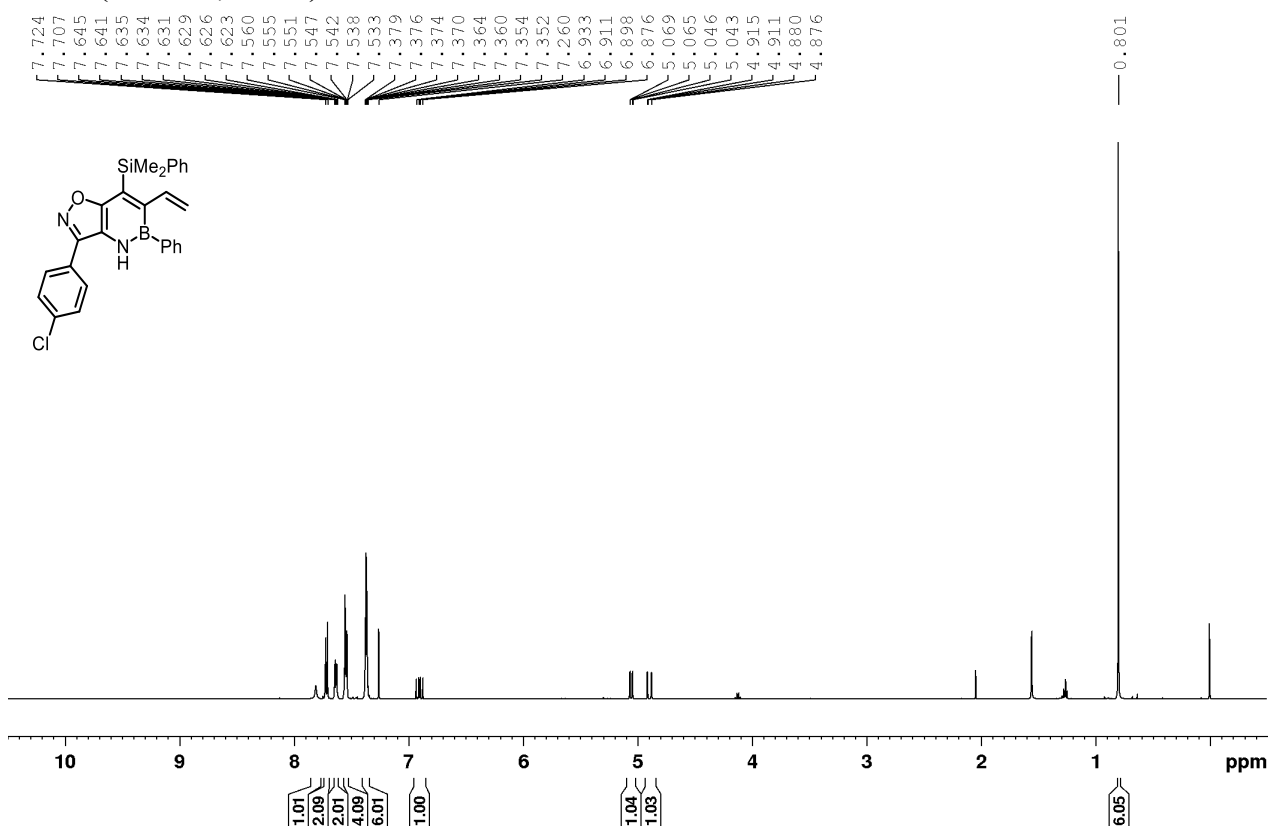

**<sup>13</sup>C NMR (125 MHz, CDCl<sub>3</sub>)**

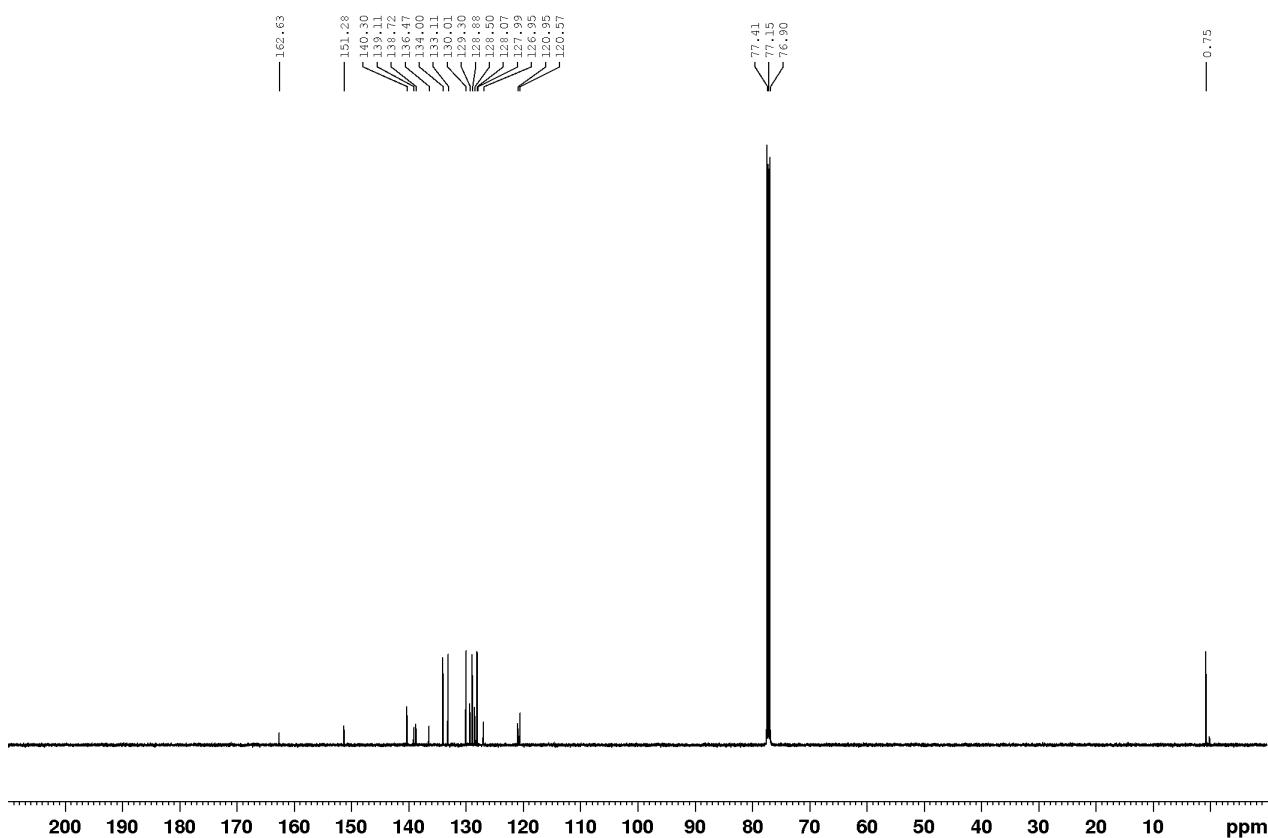



$^{11}\text{B}$  NMR (160 MHz,  $\text{CDCl}_3$ )

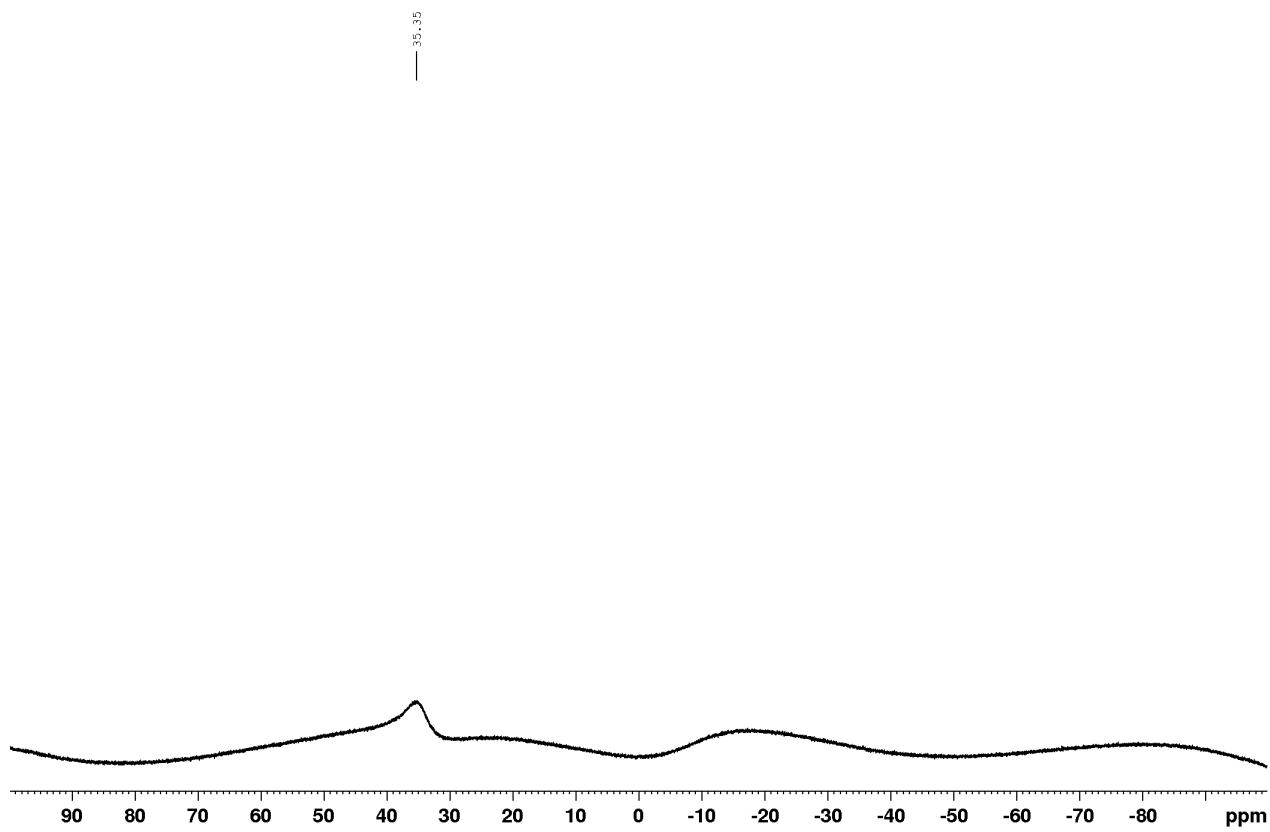

**8-(4-Chlorophenyl)-2-phenyl-4-(trimethylsilyl)-3-vinyl-2,6-dihydro-1H-[1,2]azaborinino[6,5-e][1,3]oxazine**  
**(6)**

<sup>1</sup>H NMR (500 MHz, CDCl<sub>3</sub>)

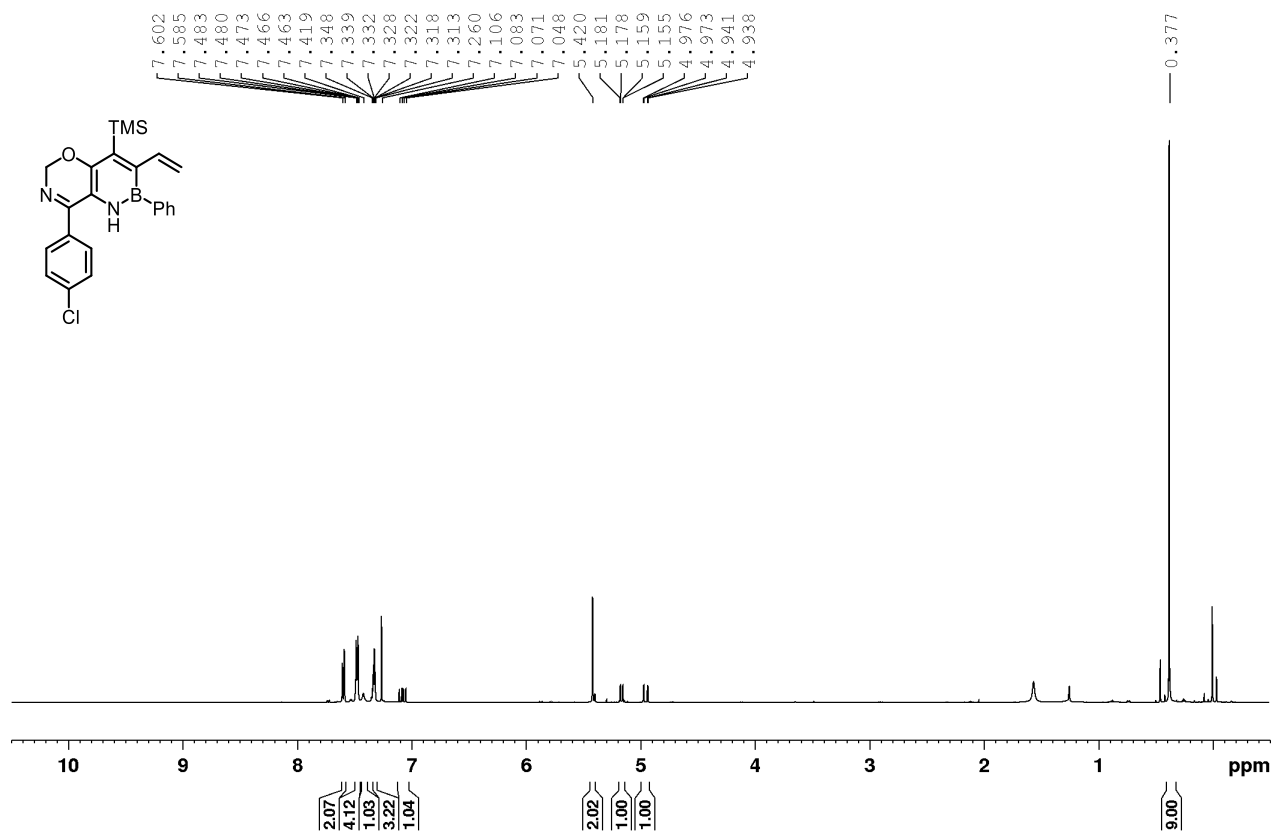

<sup>13</sup>C NMR (125 MHz, CDCl<sub>3</sub>)

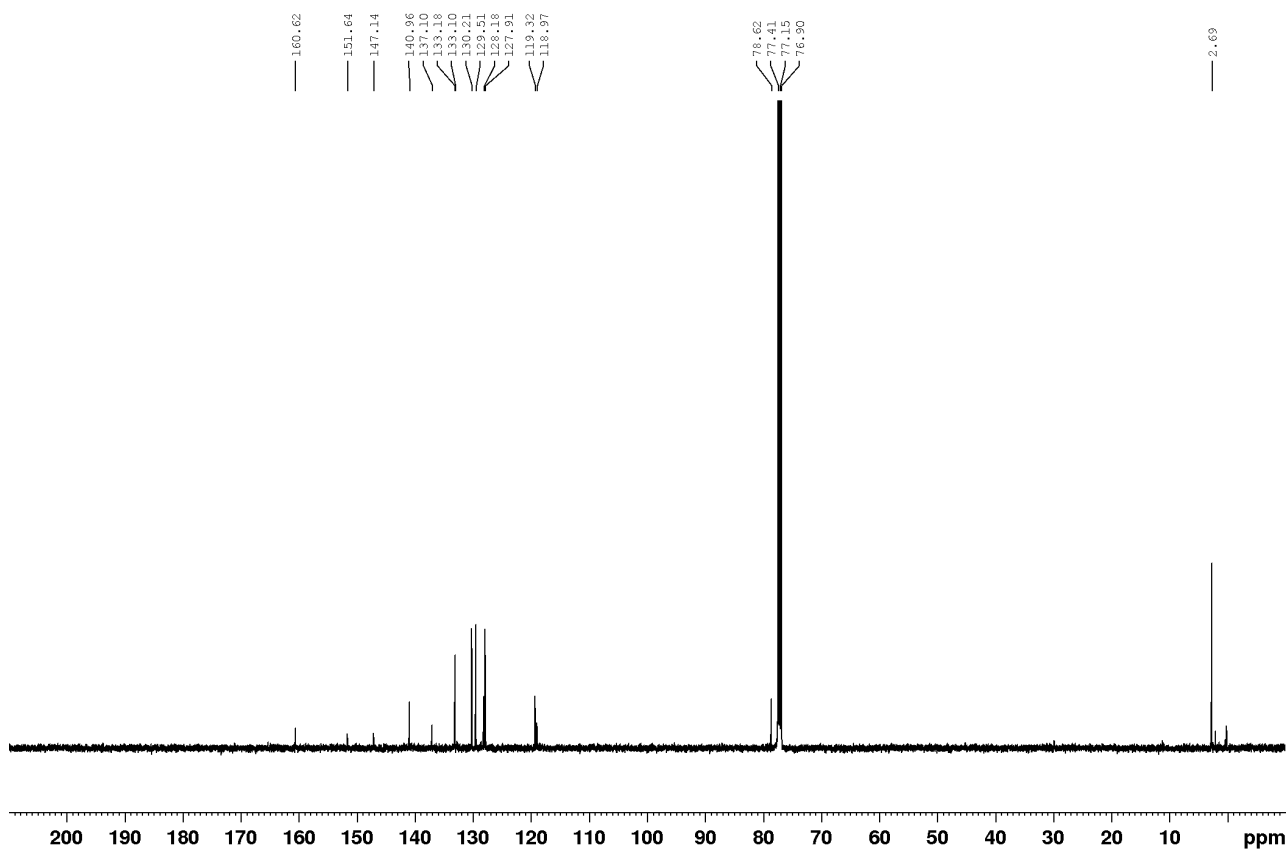

$^{11}\text{B}$  NMR (160 MHz,  $\text{CDCl}_3$ )

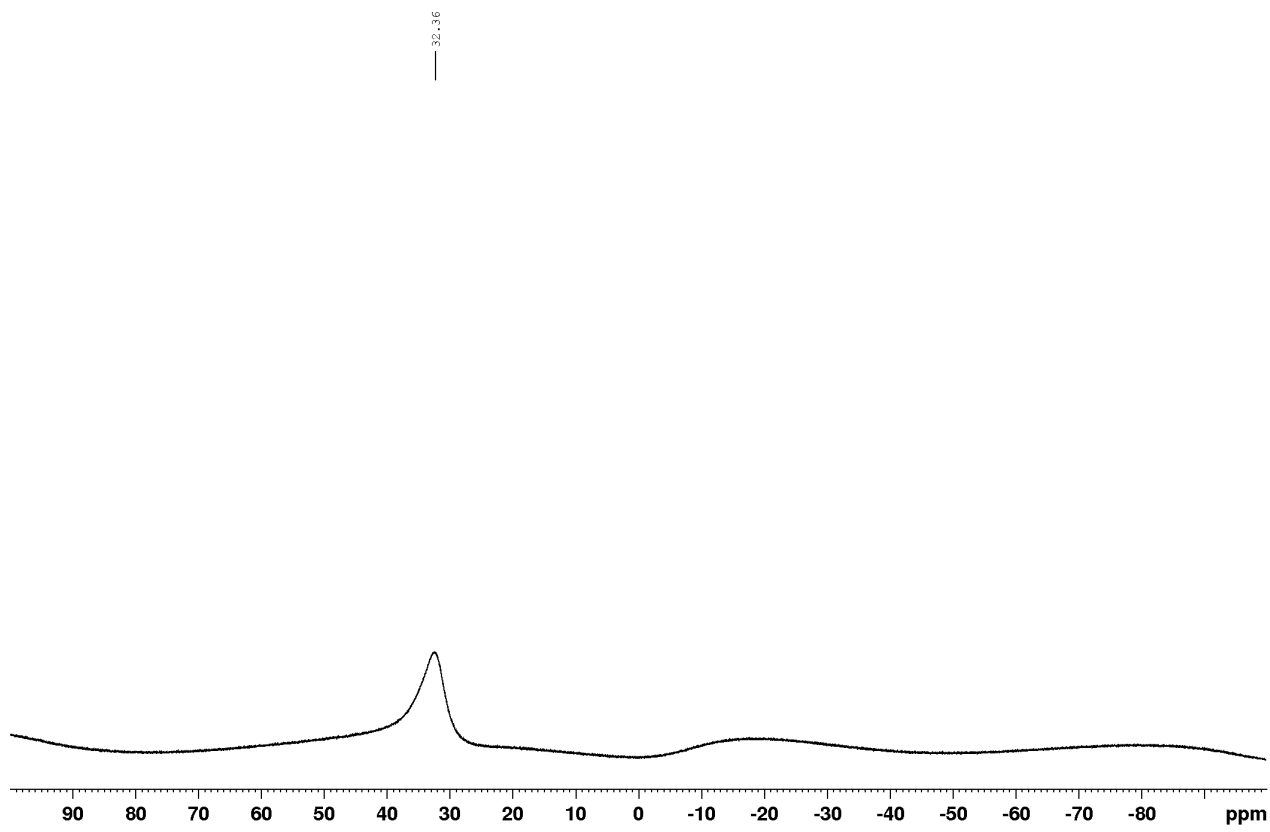

Supplement: d1cc07002a1.pdf [file d1cc07002a1.pdf]
